# Supplementary material for: Diastereo- and enantioselective nitro-Mannich reaction of α-substituted nitroacetates to N-phosphoryl imines catalyzed by cinchona alkaloid thiourea organocatalysts
Source: Royal Society of Chemistry journal article supplement (doi:10.1039/c3ob40335a), 2013-01-01
Supplement: c3ob40335a.pdf [file c3ob40335a.pdf]

**Diastereo- and Enantioselective Nitro-Mannich Reaction of  $\alpha$ -Substituted  
Nitroacetates to *N*-Phosphoryl imines Catalyzed by Cinchona Alkaloid Thiourea  
Organocatalysts**

Weidong Fan,<sup>a</sup> Shasha Kong,<sup>a</sup> Yan Cai,<sup>a</sup> Guiping Wu,<sup>a</sup> and Zhiwei Miao<sup>a,\*</sup>

<sup>a</sup> *State Key Laboratory and Institute of Elemento-Organic Chemistry, Nankai University, Tianjin 300071, P. R. China Fax:*

*(+86)-22-2350-2351; e-mail: miaozhiwei@nankai.edu.cn*

## Supporting Information

### List of contents (pages)

|                                                                                               |    |
|-----------------------------------------------------------------------------------------------|----|
| 1. General comments.....                                                                      | S1 |
| 2. General procedure for the synthesis of $\beta$ -nitro ethylphosphoramidates <b>6</b> ..... | S1 |

#### General Comments.

All reactions were carried out under an inert atmosphere and in heat-dried glassware. Solvents were dried and distilled prior to use according to the standard methods. Unless otherwise indicated, all materials were obtained from commercial sources, and used as purchased without dehydration. Chiral thiourea-based organocatalysts were prepared on the base of the literature.<sup>[1,2,3]</sup> Flash column chromatography was performed on silica gel (particle size 10-40  $\mu\text{m}$ , Ocean Chemical Factory of Qingdao, China).  $^1\text{H}$  NMR,  $^{13}\text{C}$  NMR and  $^{31}\text{P}$  NMR spectra were recorded in  $\text{CDCl}_3$  at Bruker 400 MHz spectrometers, TMS served as internal standard ( $\delta = 0$  ppm) for  $^1\text{H}$  NMR and  $^{13}\text{C}$  NMR,  $\text{H}_3\text{PO}_4$  served as internal standard ( $\delta = 0$  ppm) for  $^{31}\text{P}$  NMR. HPLC analyses were recorded on a chiral column Daicel Chiralcel AD-H column or a AS-H column, at 220 nm). The crystal structure was determined on a Bruker SMART 1000 CCD diffractometer. Mass spectra were recorded on a LCQ advantage spectrometer with ESI resource. HR-MS were recorded on APEXII and ZAB-HS spectrometer. Optical rotations were recorded on a Perkin Elemer 241 Polarimeter. Melting points were determined on a T-4 melting point apparatus (uncorrected).

#### General procedure for the synthesis of $\beta$ -nitro ethylphosphoramidates **6**:

To a solution of *N*-phosphoryl imines **4** (0.3 mmol) and chiral catalyst **3a** (0.015 mmol, 5 mol%) in toluene (3.0 mL) was added 2-nitropropanoate **5** (0.45 mmol, 1.5 equiv) at  $-20\text{ }^\circ\text{C}$  under a nitrogen atmosphere. The mixture was stirred for corresponding time at  $-20\text{ }^\circ\text{C}$  (monitored by TLC). Then saturated  $\text{NH}_4\text{Cl}$  aq (3 mL) was added, and the mixture was extracted with ethyl acetate (3 $\times$ 5 mL). The organic layers were washed with brine solution (2 mL), dried over  $\text{MgSO}_4$ , filtered and concentrated *in vacuo* to yield the crude products **6**, which were purified by flash column chromatography on silica gel [petroleum ether/ethyl acetate, 1:1 (v/v)] to provide pure products **6**.

**Methyl 3-((diethylphosphoryl)amino)-2-methyl-2-nitro-3-phenylpropanoate (6a):**

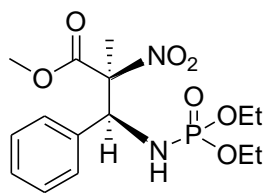

White solid; mp 114-117 °C;  $[\alpha]_D^{20} = 48.8^\circ$  ( $c = 0.005$ ,  $\text{CH}_2\text{Cl}_2$ );  $^1\text{H}$  NMR (400

MHz,  $\text{CDCl}_3$ )  $\delta$  7.30-7.38 (m, 5H), 4.92 (dd,  $J = 11.5, 9.7$  Hz, 1H), 4.83 (t,  $J =$

11.5 Hz, 1H), 3.73-3.95 (m, 6H), 3.50-3.65 (m, 1H), 1.70 (s, 3H), 1.20 (t,  $J = 7.0$

Hz, 3H), 1.02 (t,  $J = 7.0$  Hz, 3H);  $^{13}\text{C}$  NMR (101 MHz,  $\text{CDCl}_3$ )  $\delta$  165.96, 136.74, 128.74, 128.61,

128.50, 94.89 (d,  $J = 8.1$  Hz), 62.49 (d,  $J = 5.0$  Hz), 62.37 (d,  $J = 5.0$  Hz), 62.00, 53.60, 22.56, 16.00 (d,

$J = 7.5$  Hz), 15.77 (d,  $J = 7.5$  Hz);  $^{31}\text{P}$  NMR (162 MHz,  $\text{CDCl}_3$ )  $\delta$  5.86, 5.67; HRMS (MALDI)

calculated for  $[\text{C}_{15}\text{H}_{23}\text{N}_2\text{O}_7\text{P}+\text{H}]^+$ : 375.1321, Found: 375.1315; HPLC (Chiralcel AD-H, hexane/*i*PrOH,

85:15 v/v, 1.0mL/min, 23°C, UV 220 nm): tr (minor) = 10.848 min, tr (major) = 14.388 min, tr (major)

= 15.401 min, tr (major) = 17.012 min.

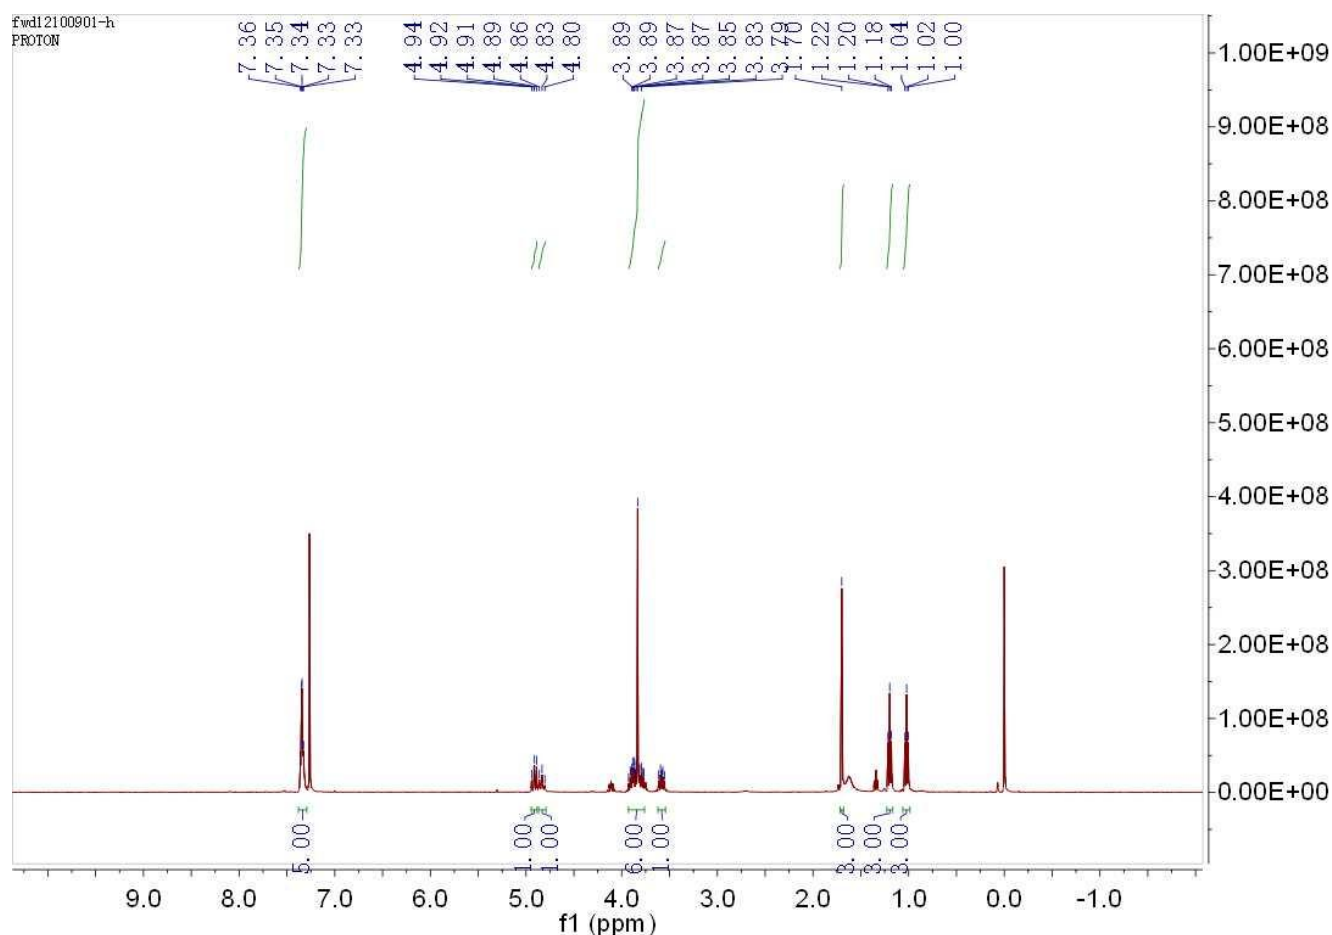

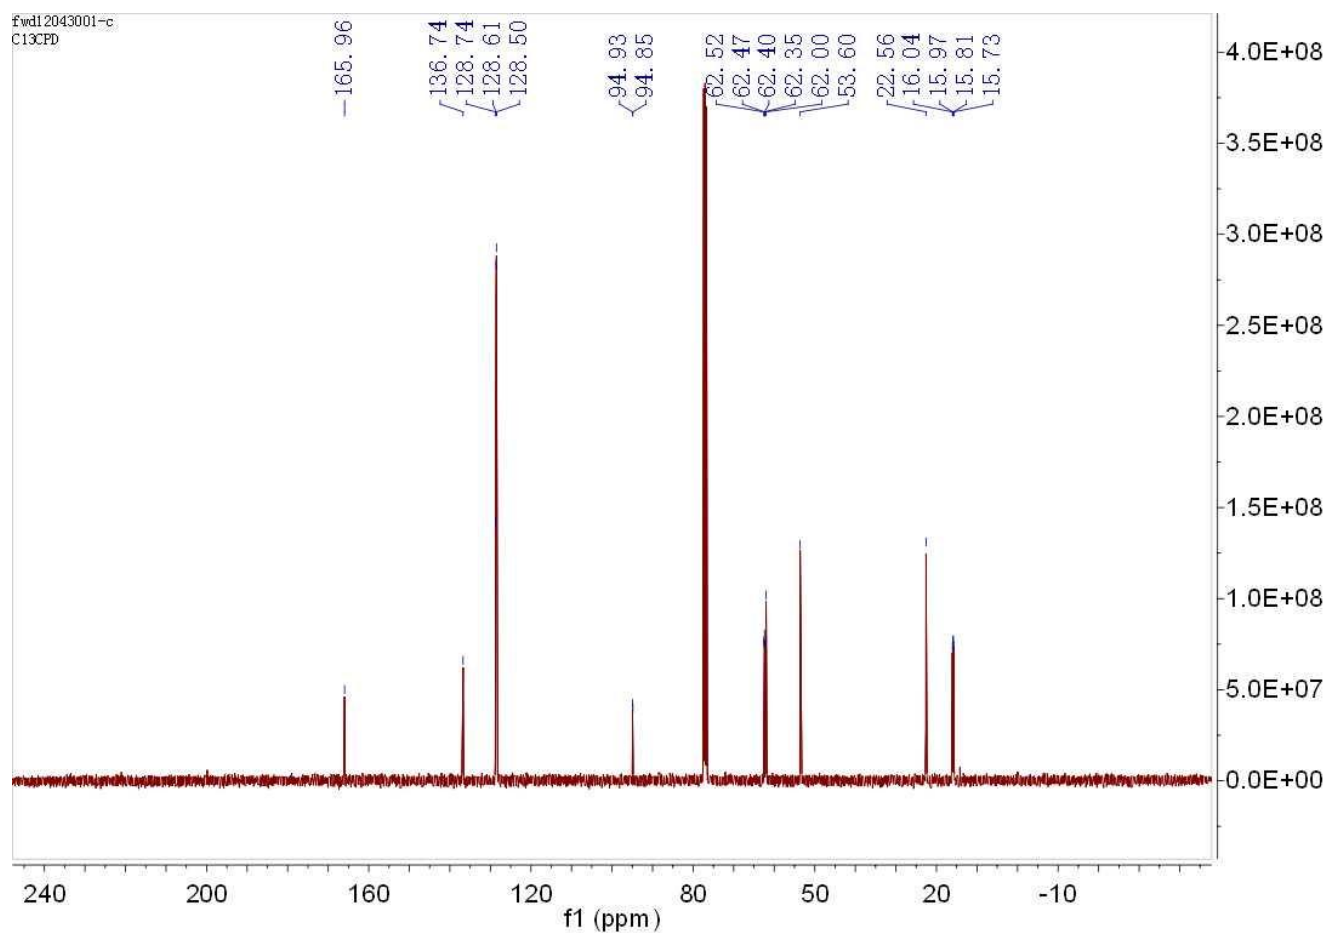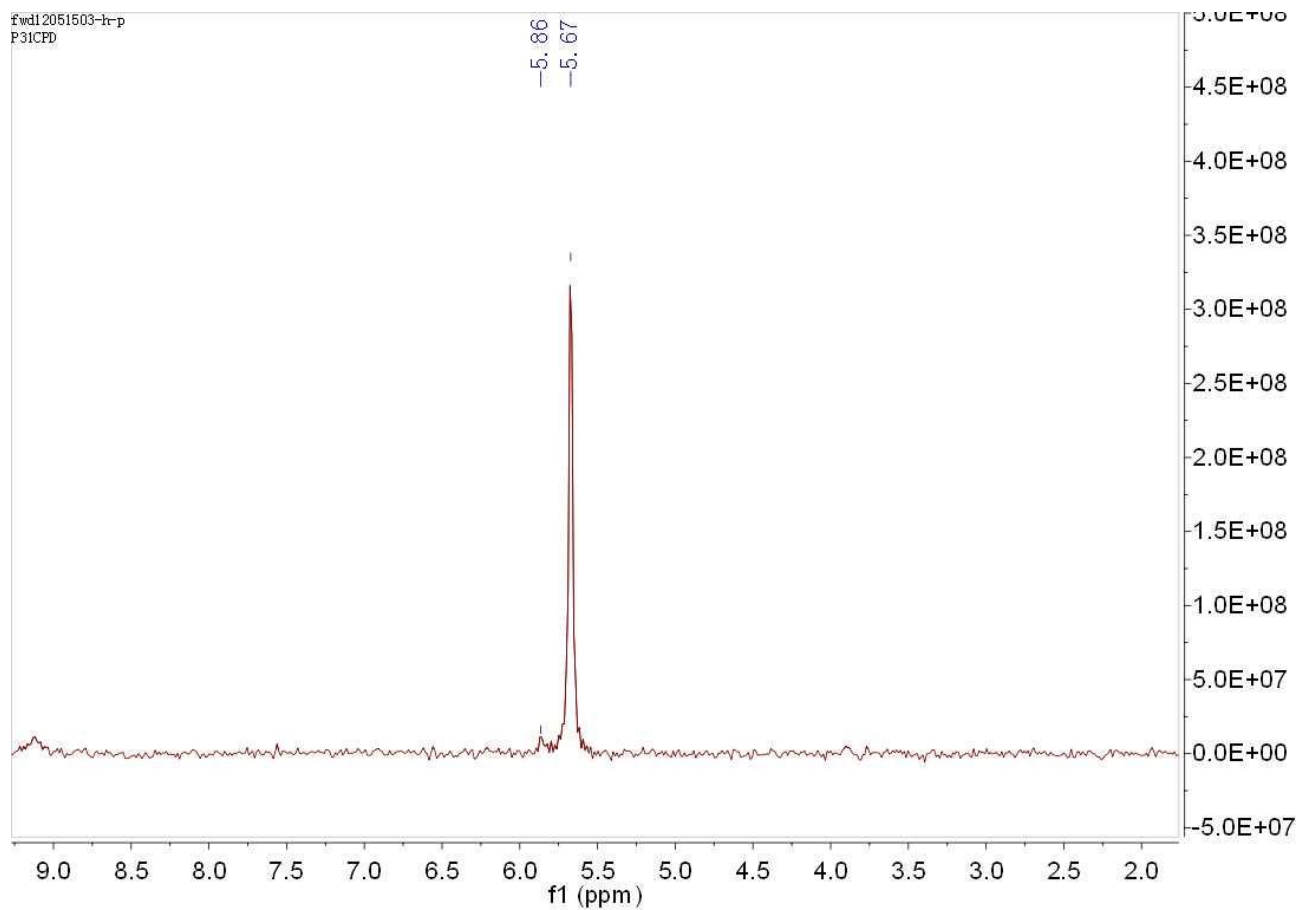

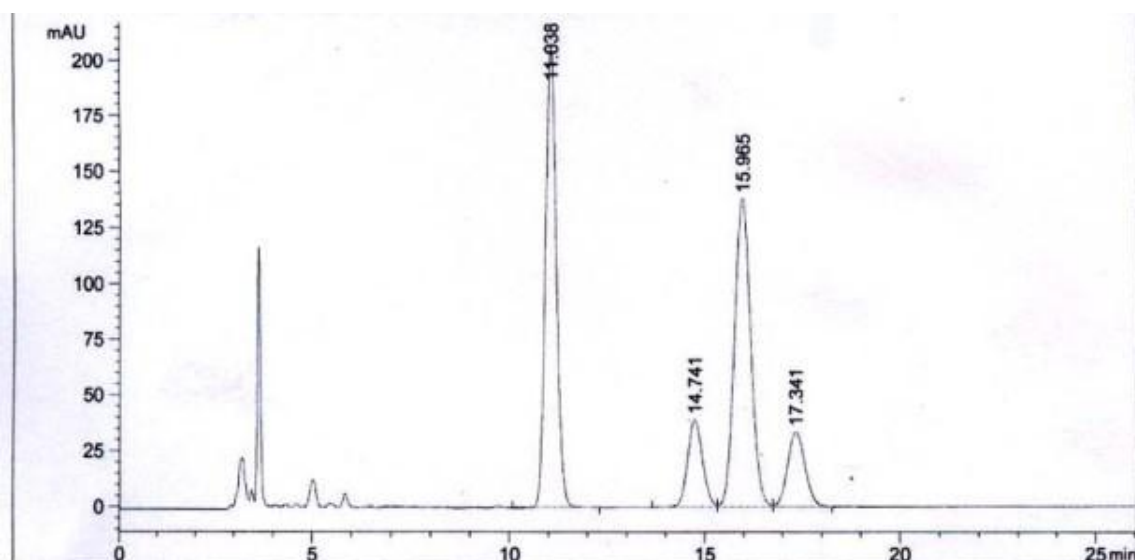

| # | [min]  |    | [min]  | mAU        | *s        | [mAU ]  | % |
|---|--------|----|--------|------------|-----------|---------|---|
| 1 | 11.038 | VB | 0.3013 | 4004.04199 | 207.03935 | 39.4843 |   |
| 2 | 14.741 | VV | 0.4202 | 1056.84265 | 39.09988  | 10.4216 |   |
| 3 | 15.965 | VV | 0.4534 | 4027.57129 | 138.26025 | 39.7163 |   |
| 4 | 17.341 | VV | 0.4877 | 1052.39746 | 33.60102  | 10.3778 |   |

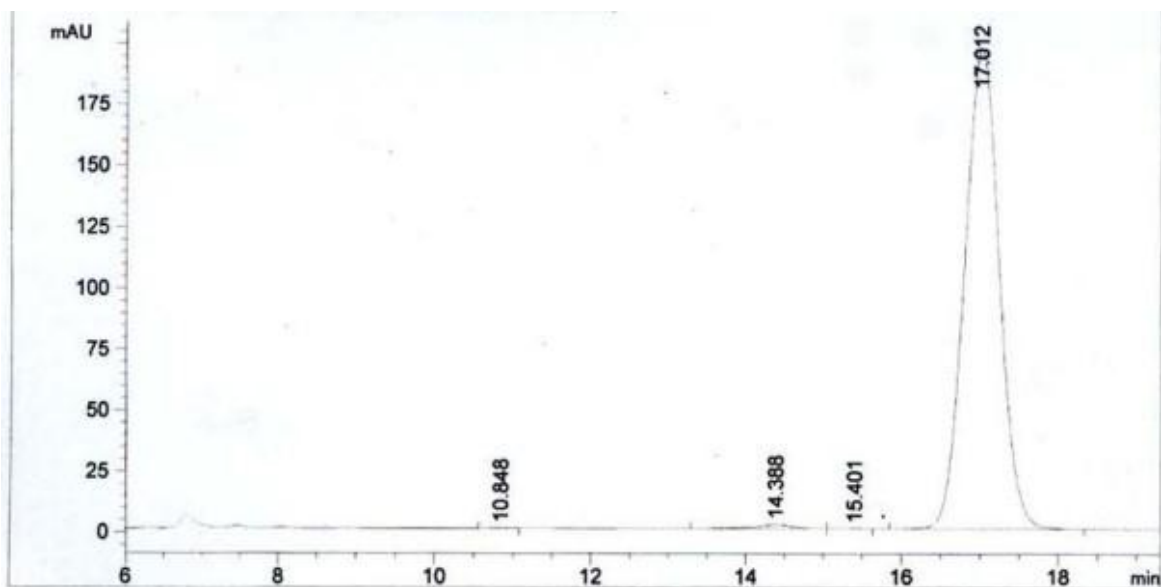

| # | [min]  |    | [min]  | mAU        | *s         | [mAU]   | % |
|---|--------|----|--------|------------|------------|---------|---|
| 1 | 10.848 | VV | 0.2435 | 3.99938    | 2.03771e-1 | 0.0652  |   |
| 2 | 14.388 | BV | 0.4405 | 54.30903   | 1.73672    | 0.8854  |   |
| 3 | 15.401 | VV | 0.2538 | 2.37142    | 1.14247e-1 | 0.0387  |   |
| 4 | 17.012 | VV | 0.4800 | 6073.36621 | 197,26630  | 99.0108 |   |

**Methyl 3-((diethylphosphoryl)amino)-3-(2-fluorophenyl)-2-methyl-2-nitropropanoate (6b):**

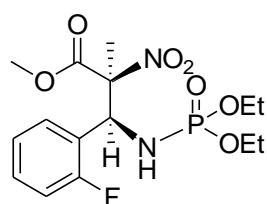

White solid; mp 68-71 °C;  $[\alpha]_D^{20} = 56.4^\circ$  ( $c = 0.005$ ,  $\text{CH}_2\text{Cl}_2$ );  $^1\text{H}$  NMR (300

MHz,  $\text{CDCl}_3$ )  $\delta$  7.28-7.39 (m, 2H), 7.12-7.21 (m, 1H), 7.01-7.12 (m, 1H), 5.37

(dd,  $J = 11.4, 10.4$  Hz, 1H), 4.75 (t,  $J = 11.4$  Hz, 1H), 3.79-4.01 (m, 6H),

3.57-3.71 (m, 1H), 1.74 (s, 3H), 1.23 (t,  $J = 7.0$  Hz, 3H), 1.04 (t,  $J = 7.0$  Hz, 3H);  $^{13}\text{C}$  NMR (101 MHz,

$\text{CDCl}_3$ )  $\delta$  165.81, 160.20 (d,  $J = 247.2$  Hz), 130.46, 129.46, 124.68, 124.36, 115.50 (d,  $J = 22.9$  Hz),

94.81 (d,  $J = 7.9$  Hz), 62.64 (d,  $J = 5.3$  Hz), 62.39 (d,  $J = 5.4$  Hz), 54.33 (s), 53.64 (s), 21.36 (d,  $J = 2.6$

Hz), 15.98 (d,  $J = 7.4$  Hz), 15.67 (d,  $J = 7.5$  Hz);  $^{31}\text{P}$  NMR (162 MHz,  $\text{CDCl}_3$ )  $\delta$  5.65, 5.39; HRMS

(MALDI) calculated for  $[\text{C}_{15}\text{H}_{22}\text{FN}_2\text{O}_7\text{P}+\text{H}]^+$ : 415.1046, Found 415.1044; HPLC (Chiralcel AD-H,

hexane/*i*PrOH, 85:15 v/v, 1.0mL/min, 23°C, UV 220 nm): tr (minor) = 10.252 min, tr (major) = 12.068

min, tr (major) = 14.155 min, tr (major) = 16.552 min.

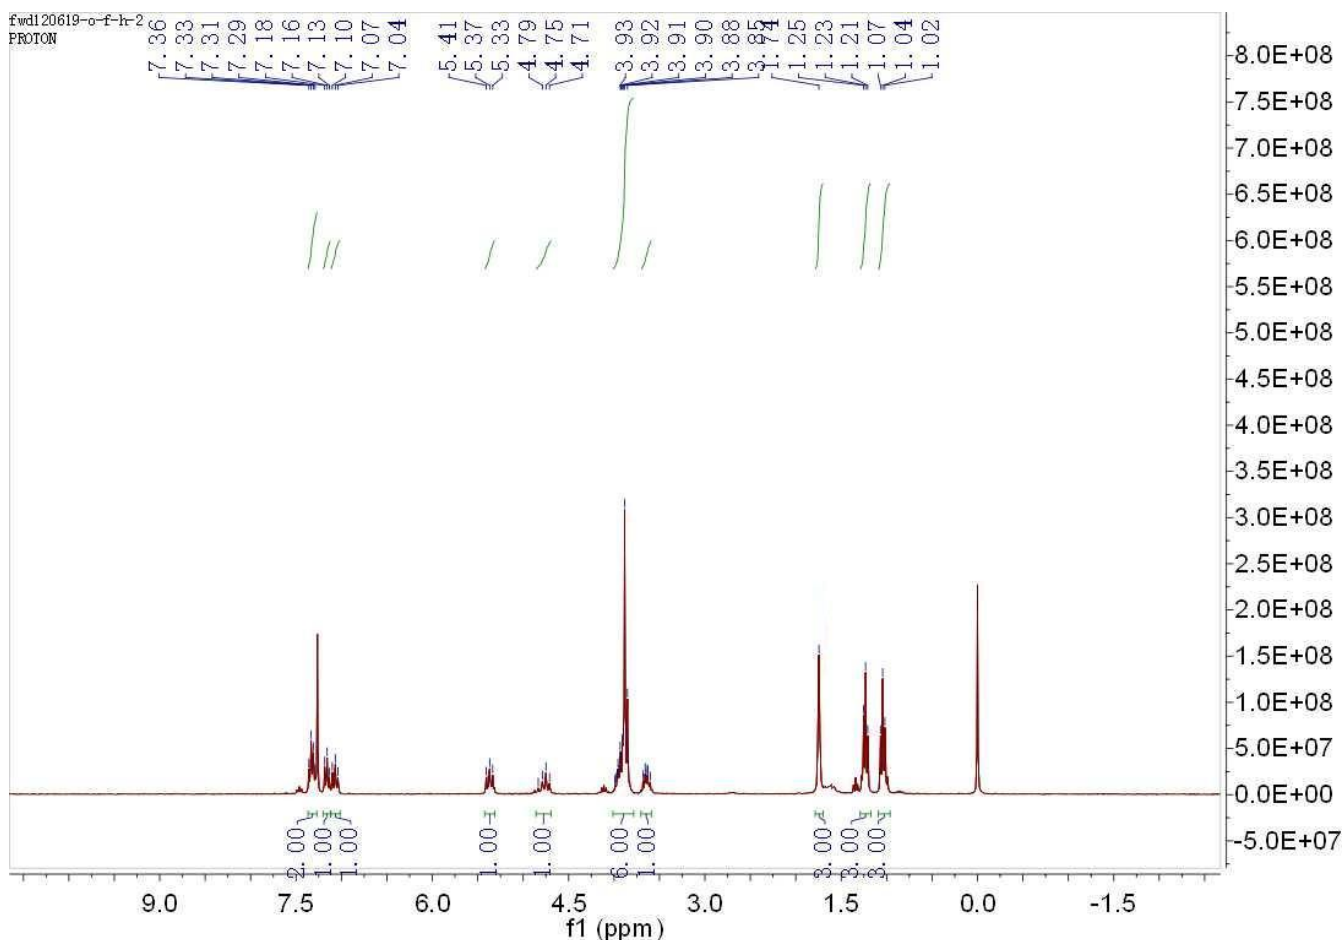

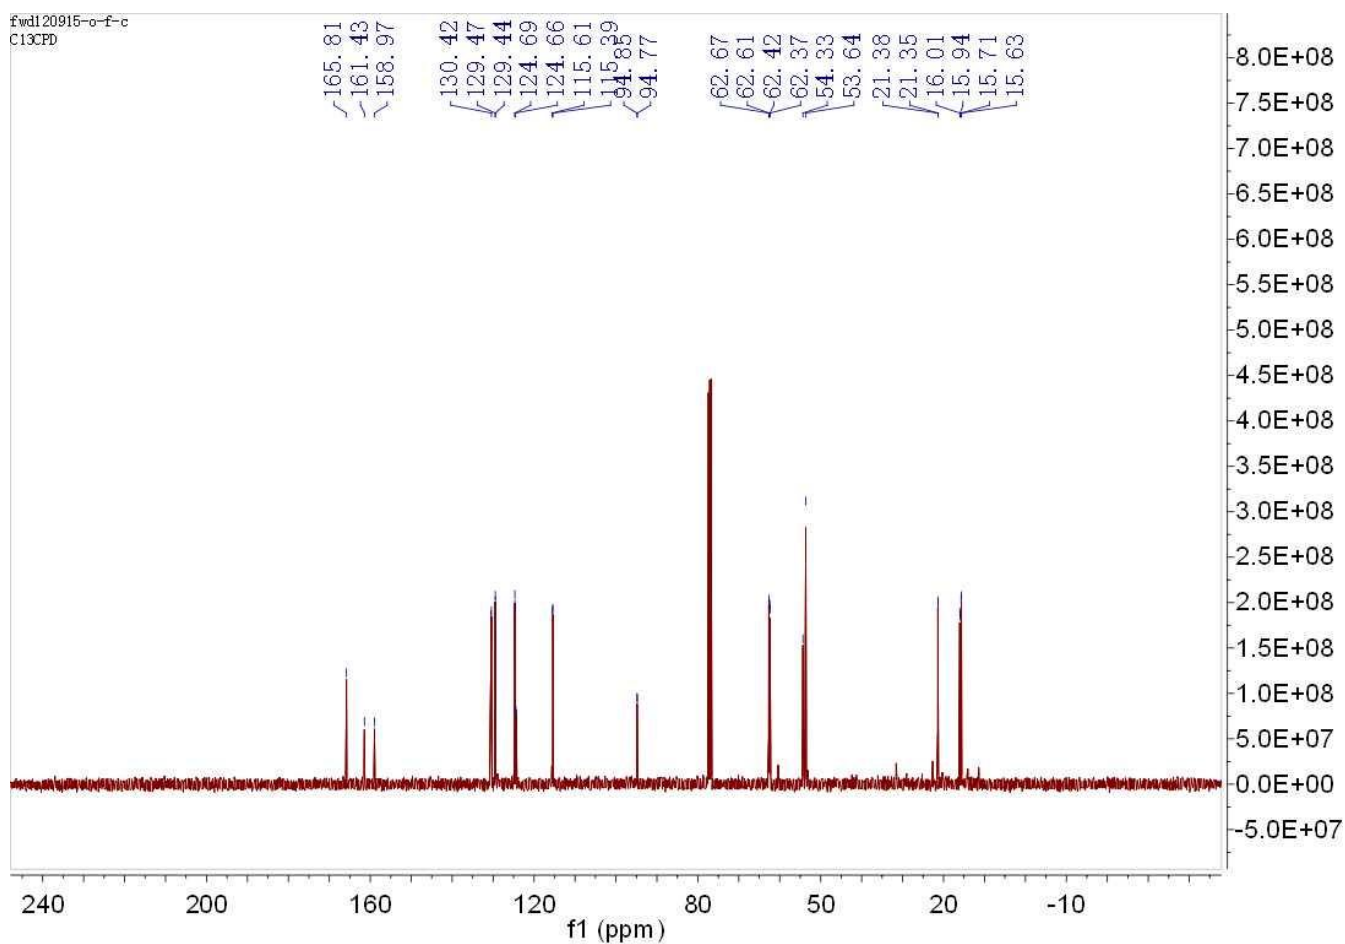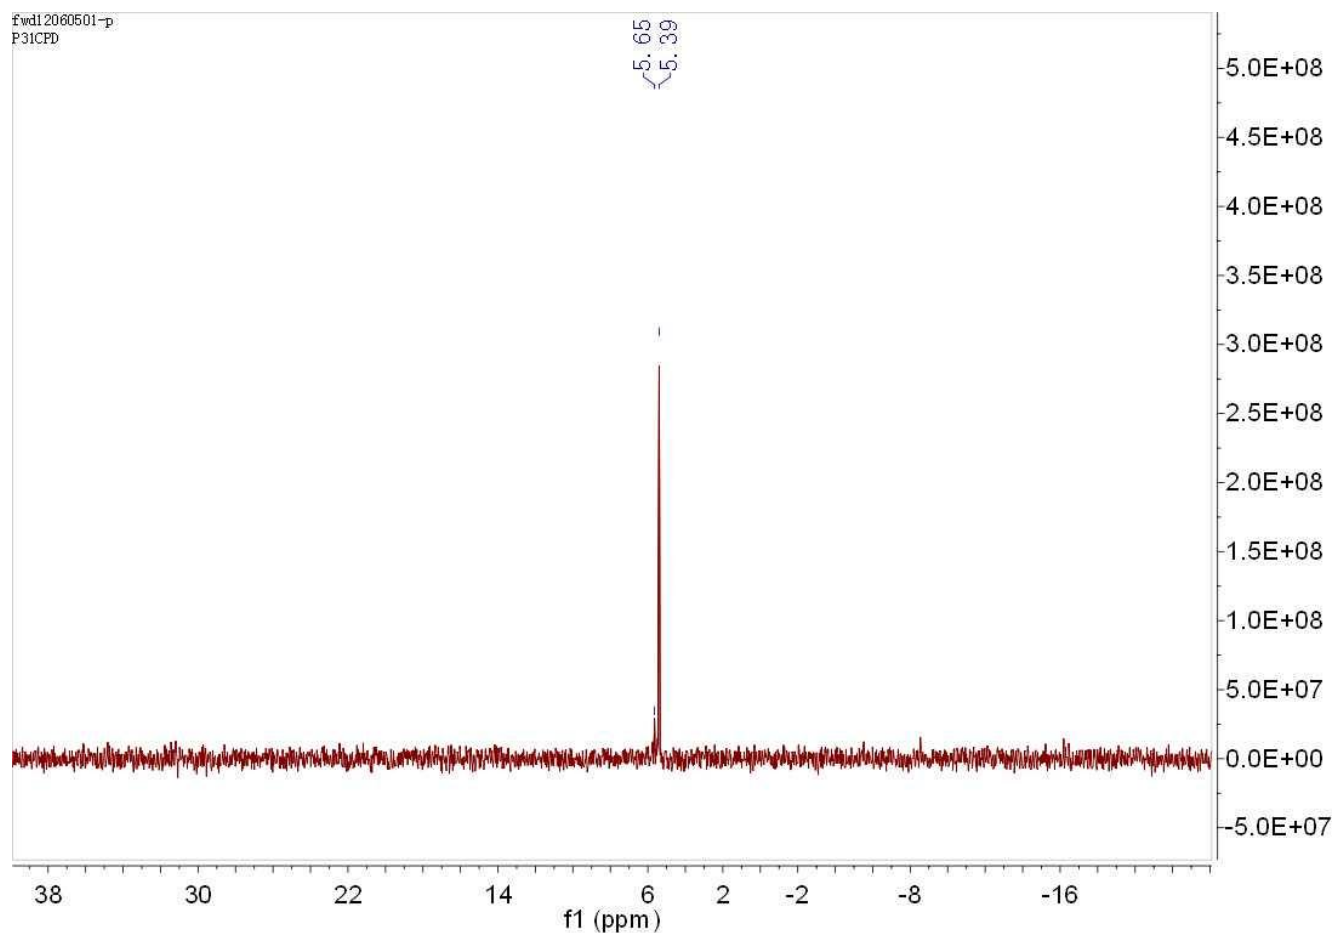

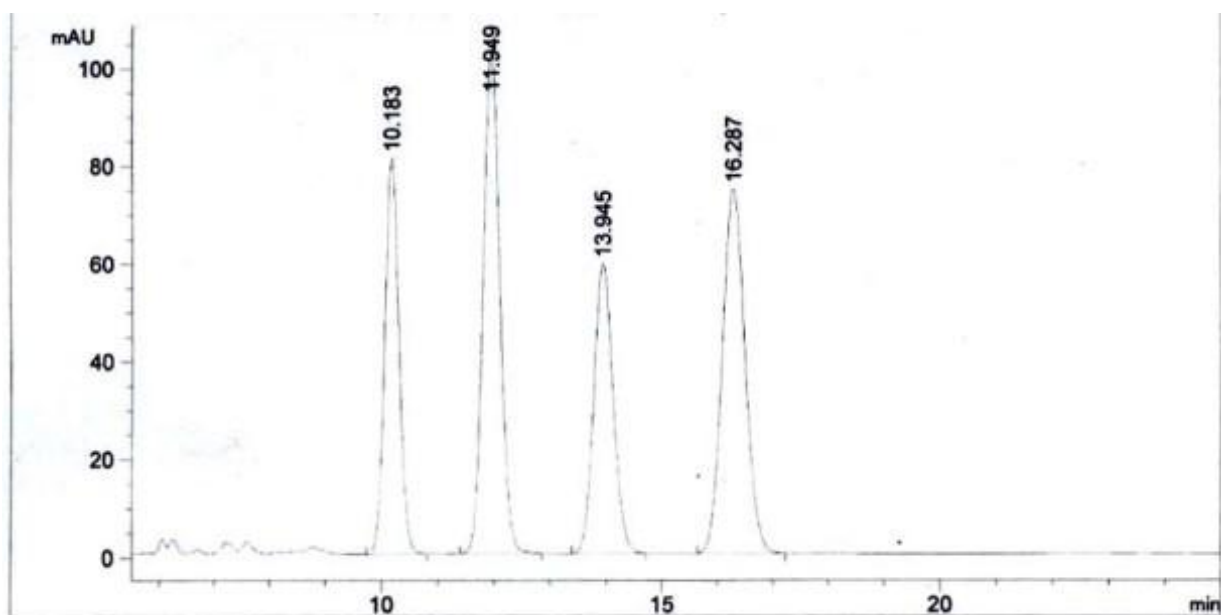

| # | [min]  |    | [min]  | mAU        | *s | [mAU ]    | %       |
|---|--------|----|--------|------------|----|-----------|---------|
| 1 | 10.183 | BB | 0.2701 | 1420.37500 |    | 81.01555  | 20.0056 |
| 2 | 11.949 | BB | 0.3196 | 2130.50952 |    | 103.14367 | 30.0077 |
| 3 | 13.945 | BB | 0.3732 | 1423.87988 |    | 59.33326  | 20.0550 |
| 4 | 16.287 | BB | 0.4426 | 2125.10742 |    | 74.68053  | 29.9316 |

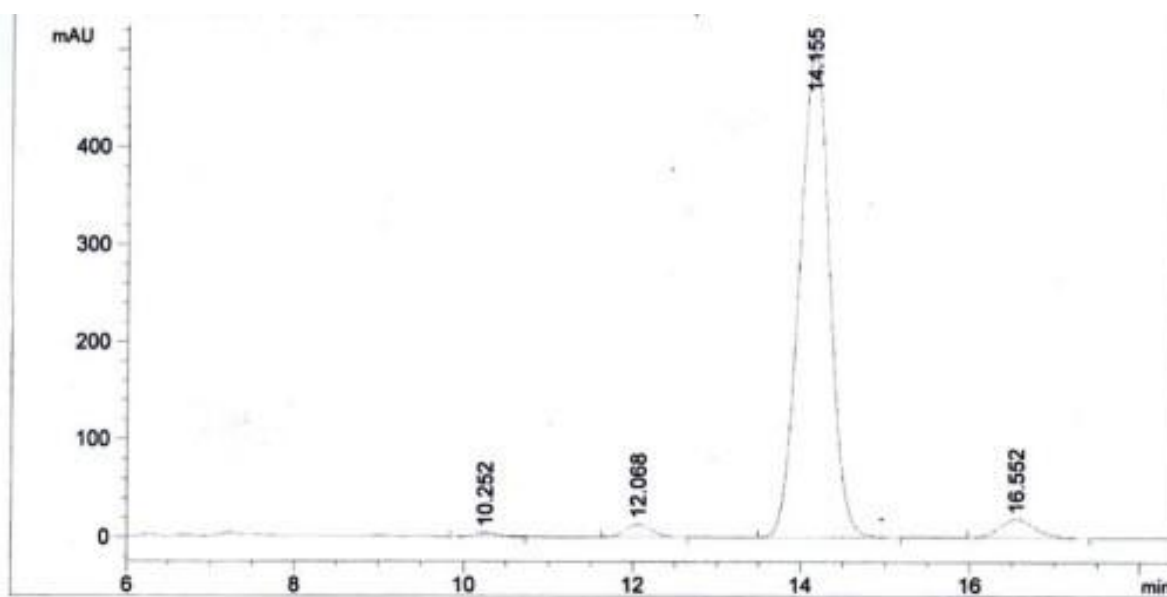

| # | [min]  |    | [min]  | mAU       | *s | [mAU ]    | %       |
|---|--------|----|--------|-----------|----|-----------|---------|
| 1 | 10.252 | VB | 0.2803 | 72.35455  |    | 4.01229   | 0.5399  |
| 2 | 12.068 | BB | 0.3283 | 277.97662 |    | 13.14114  | 2.0743  |
| 3 | 14.155 | BB | 0.3908 | 1.24993e4 |    | 499.74579 | 93.2717 |
| 4 | 16.552 | BB | 0.4525 | 551.32843 |    | 18.97832  | 4.1141  |

**Methyl 3-((diethylphosphoryl)amino)-3-(2-bromophenyl)-2-methyl-2-nitropropanoate (6c):**

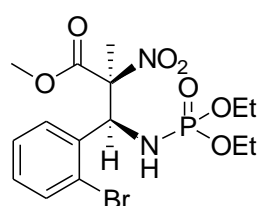

White solid; mp 80-83 °C;  $[\alpha]_D^{20} = 9.8^\circ$  ( $c = 0.01$ ,  $\text{CH}_2\text{Cl}_2$ );  $^1\text{H}$  NMR (300 MHz,  $\text{CDCl}_3$ )  $\delta$  7.49-7.65 (m, 1H), 7.25-7.38 (m, 2H), 7.11-7.24 (m, 1H), 5.66 (t,  $J = 10.3$  Hz, 1H), 4.91 (t,  $J = 11.6$  Hz, 1H), 3.76-4.07 (m, 6H), 3.44-3.61 (m, 1H), 1.75 (s, 3H), 1.28 (t,  $J = 7.0$  Hz, 3H), 1.00 (t,  $J = 7.0$  Hz, 3H);  $^{13}\text{C}$  NMR (101 MHz,  $\text{CDCl}_3$ )  $\delta$  166.72, 136.60, 133.05, 130.22, 128.57, 128.41, 125.33, 96.43 (d,  $J = 8.8$  Hz), 62.79 (d,  $J = 5.6$  Hz), 62.41 (d,  $J = 5.5$  Hz), 57.85, 54.00, 20.60, 16.12 (d,  $J = 7.7$  Hz), 15.74 (d,  $J = 7.7$  Hz);  $^{31}\text{P}$  NMR (162 MHz,  $\text{CDCl}_3$ )  $\delta$  5.27, 5.14; HRMS (MALDI) calculated for  $[\text{C}_{15}\text{H}_{22}\text{BrN}_2\text{O}_7\text{P}+\text{Na}]^+$ : 475.0246, Found 475.0242; HPLC (Chiralcel AD-H, hexane/*i*PrOH, 85:15 v/v, 1.0mL/min, 23°C, UV 220 nm): tr (minor) = 8.617min, tr (major) = 12.468 min, tr (major) = 13.262 min, tr (major) = 17.233 min.

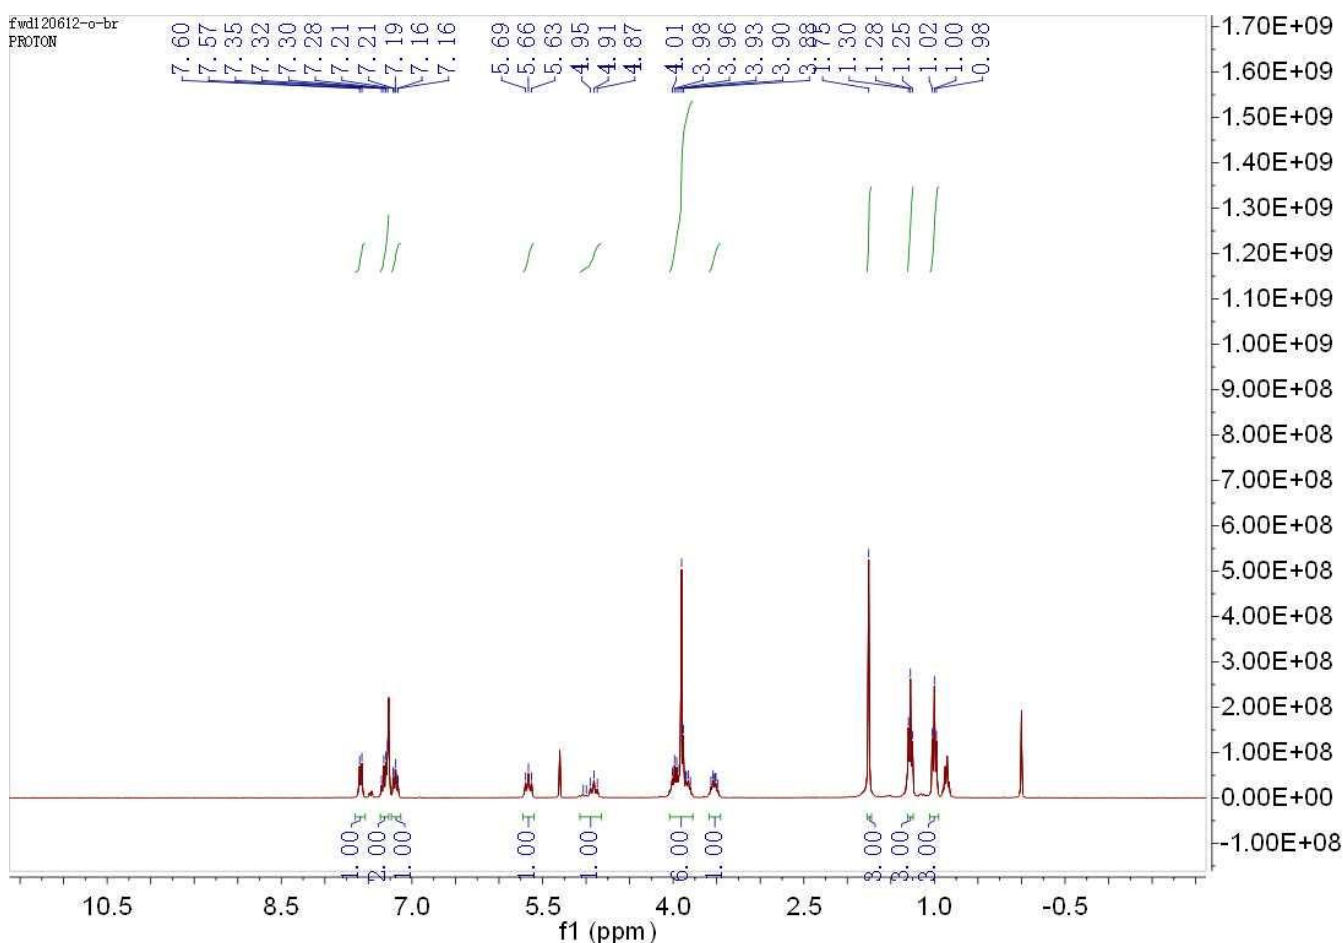

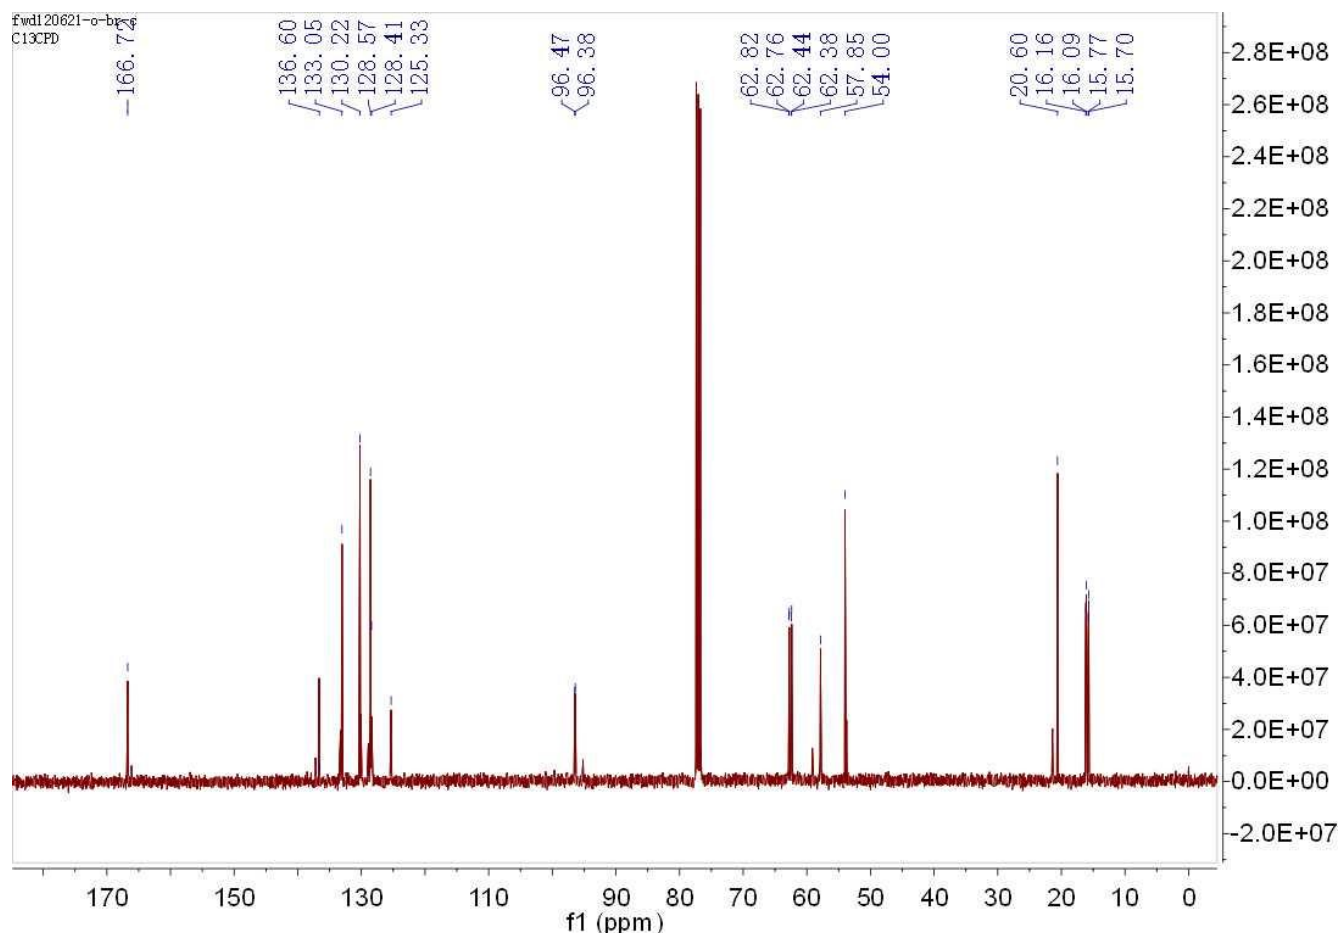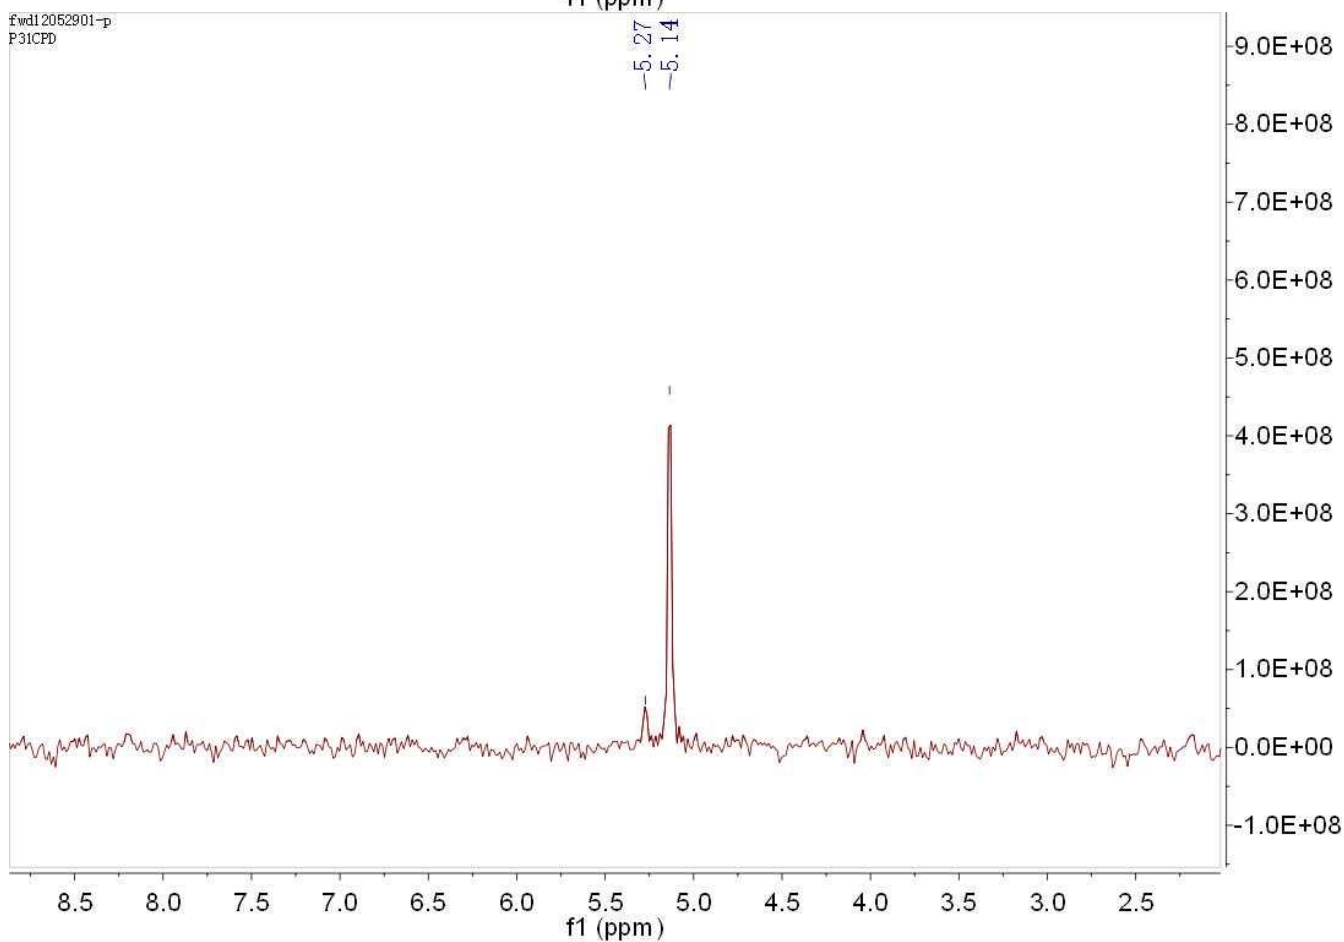

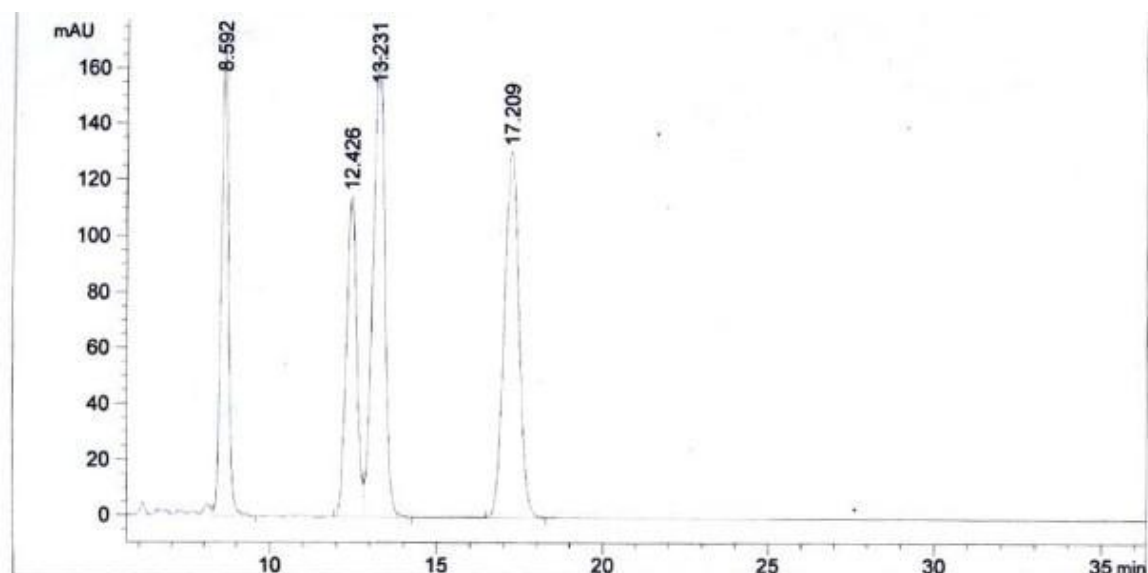

| # | [min]  |    | [min]  | mAU        | *s | [mAU ]    | %       |
|---|--------|----|--------|------------|----|-----------|---------|
| 1 | 8.592  | VB | 0.2361 | 2600.24365 |    | 169.14220 | 19.6698 |
| 2 | 12.426 | BV | 0.3379 | 2491.85205 |    | 114.72330 | 18.8498 |
| 3 | 13.231 | VB | 0.3803 | 4078.69800 |    | 165.71559 | 30.8536 |
| 4 | 17.209 | BB | 0.4795 | 4048.70557 |    | 131.16098 | 30.6268 |

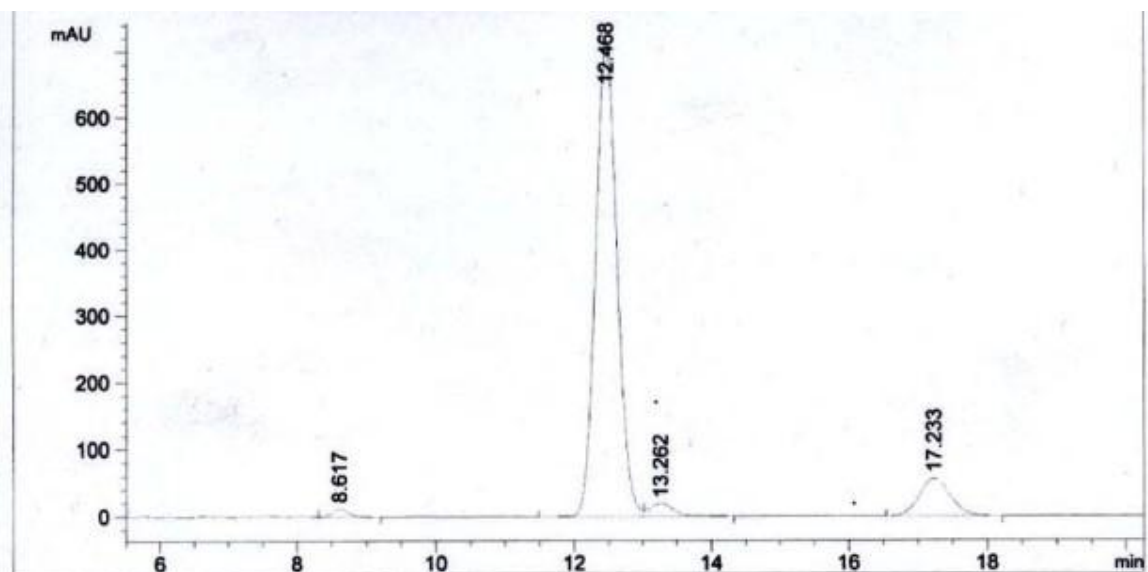

| # | [min]  |    | [min]  | mAU        | *s | [mAU ]    | %       |
|---|--------|----|--------|------------|----|-----------|---------|
| 1 | 8.617  | VB | 0.2440 | 201.84937  |    | 12.67476  | 1.1273  |
| 2 | 12.468 | VV | 0.3400 | 1.54767e4  |    | 710.59247 | 86.4351 |
| 3 | 13.262 | VB | 0.3730 | 476.15884  |    | 19.34979  | 2.6593  |
| 4 | 17.233 | BB | 0.4815 | 1750.85071 |    | 56.40494  | 9.7783  |

**Methyl 3-((diethylphosphoryl)amino)-3-(3-fluorophenyl)-2-methyl-2-nitropropanoate (6d):**

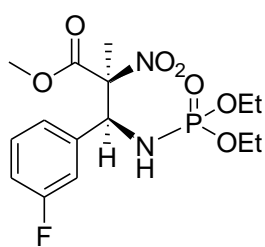

White solid; mp 90-93 °C;  $[\alpha]_D^{20} = 51.2^\circ$  ( $c = 0.005$ ,  $\text{CH}_2\text{Cl}_2$ );  $^1\text{H}$  NMR (300 MHz,  $\text{CDCl}_3$ )  $\delta$  7.27-7.38 (m, 1H), 6.97-7.20 (m, 3H), 4.92 (dd,  $J = 11.5, 9.4$  Hz, 1H), 4.79 (t,  $J = 11.5$  Hz, 1H), 3.75-3.99 (m, 6H), 3.51-3.75 (m, 1H), 1.71 (s, 3H), 1.21 (t,  $J = 7.1$  Hz, 3H), 1.07 (t,  $J = 7.1$  Hz, 3H);  $^{13}\text{C}$  NMR (101 MHz,  $\text{CDCl}_3$ )  $\delta$  165.87, 162.64 (d,  $J = 247.3$  Hz), 139.38, 130.11, 124.47, 115.75, 115.43, 94.72 (d,  $J = 7.9$  Hz), 62.59 (d,  $J = 5.3$  Hz), 62.48 (d,  $J = 5.2$  Hz), 61.48, 53.72, 22.27, 15.99 (d,  $J = 7.4$  Hz), 15.79 (d,  $J = 7.4$  Hz);  $^{31}\text{P}$  NMR (162 MHz,  $\text{CDCl}_3$ )  $\delta$  5.88, 5.66; HRMS (MALDI) calculated for  $[\text{C}_{15}\text{H}_{22}\text{FN}_2\text{O}_7\text{P}+\text{Na}]^+$ : 415.1046, Found 415.1043; HPLC (Chiralcel AD-H, hexane/*i*PrOH, 85:15 v/v, 1.0mL/min, 23°C, UV 220 nm): tr (minor) = 8.831 min, tr (major) = 12.005 min, tr (major) = 13.113 min, tr (major) = 15.505 min.

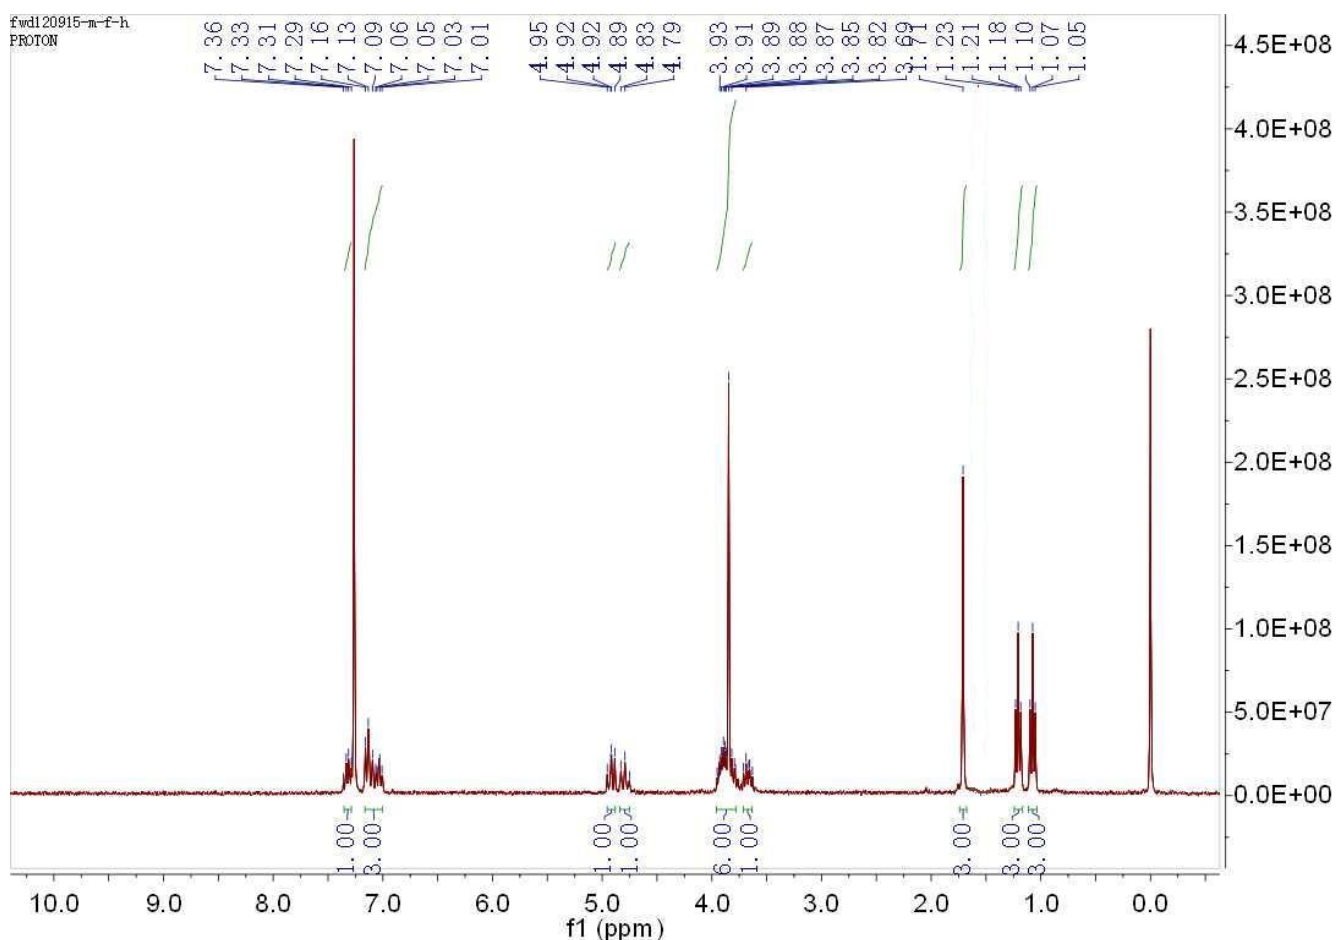

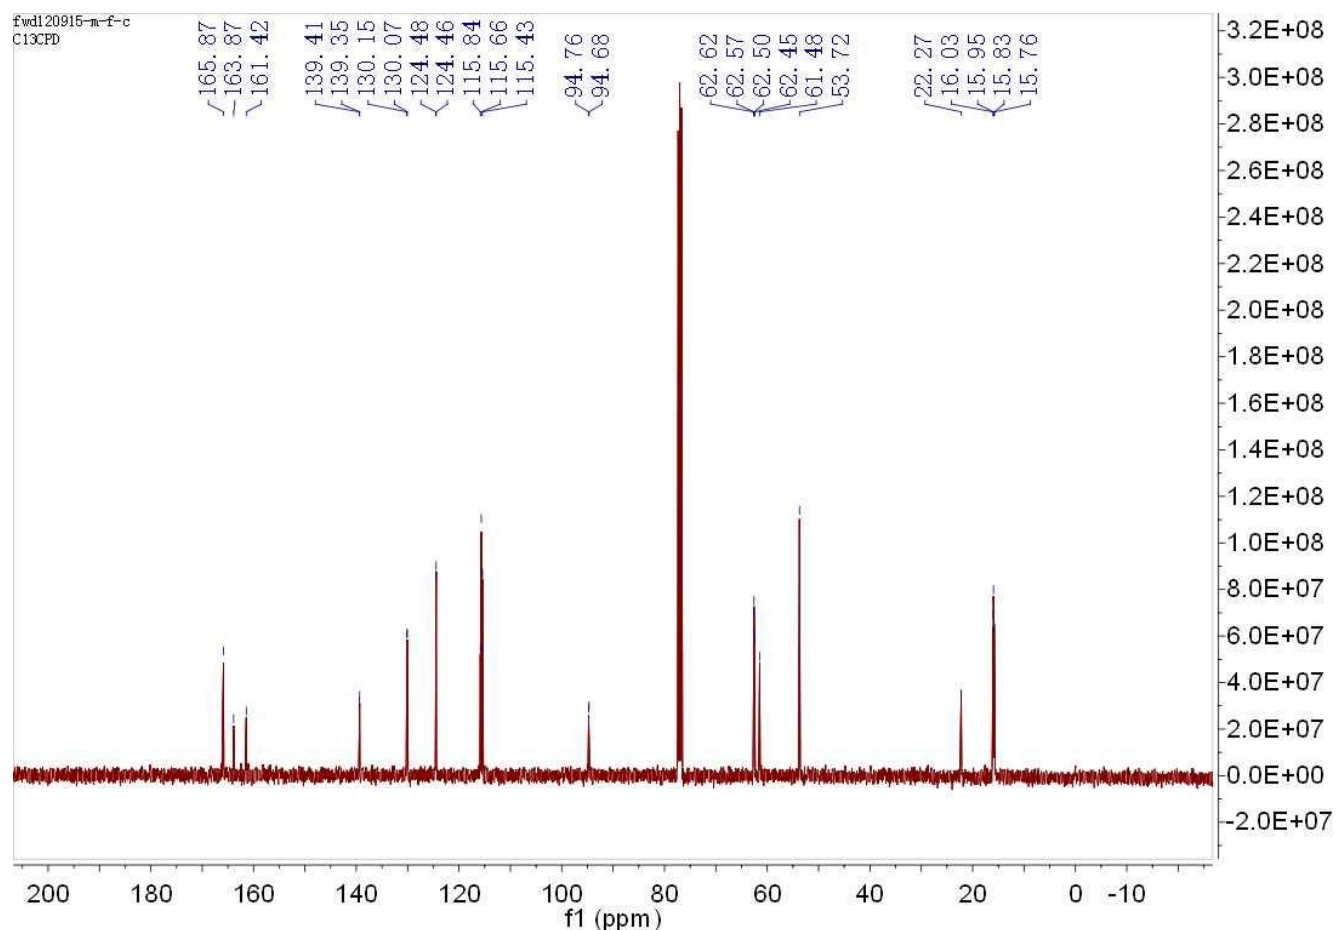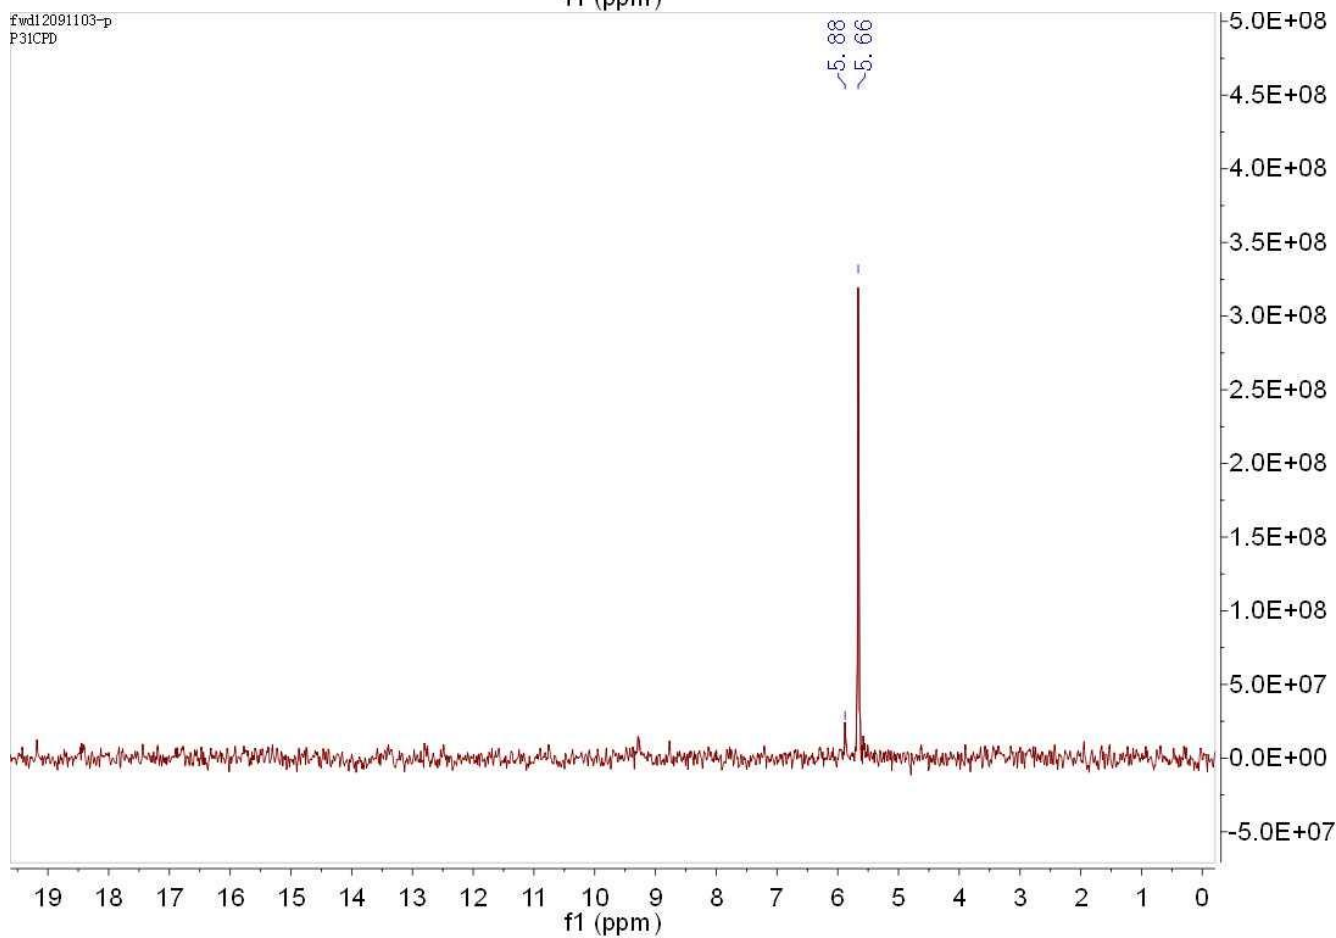

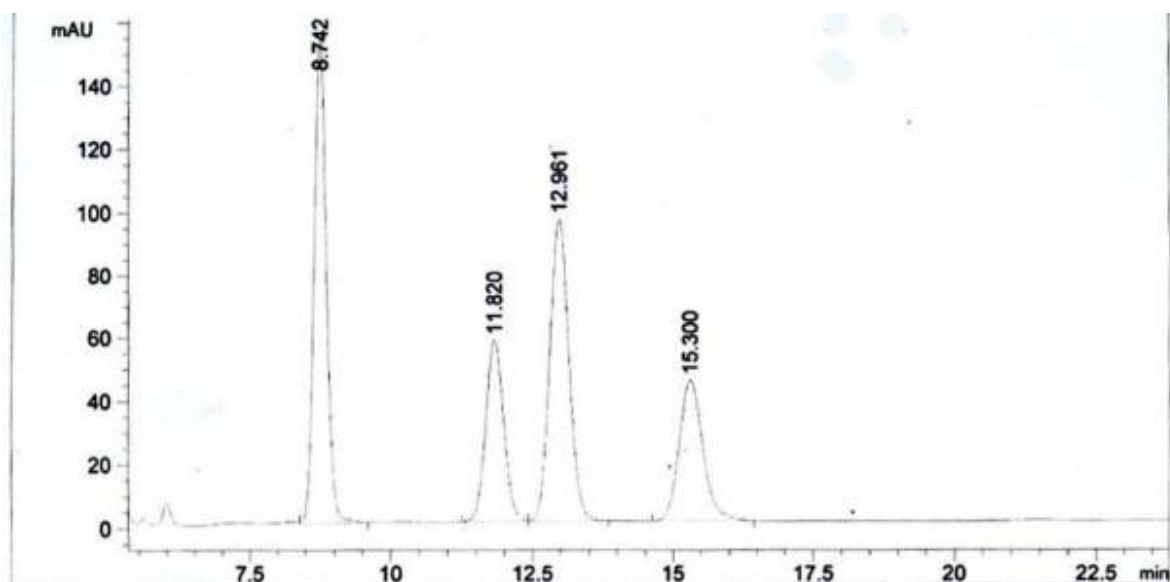

| # | [min]  |    | [min]  | mAU        | *s        | [mAU ]  | % |
|---|--------|----|--------|------------|-----------|---------|---|
| 1 | 8.742  | VB | 0.2353 | 2311.87158 | 152.30722 | 32.3189 |   |
| 2 | 11.820 | BV | 0.3420 | 1262.78503 | 57.20149  | 17.6531 |   |
| 3 | 12.961 | VB | 0.3656 | 2261.33594 | 95.80389  | 31.6124 |   |
| 4 | 15.300 | BB | 0.4577 | 1317.32996 | 44.28624  | 18.4156 |   |

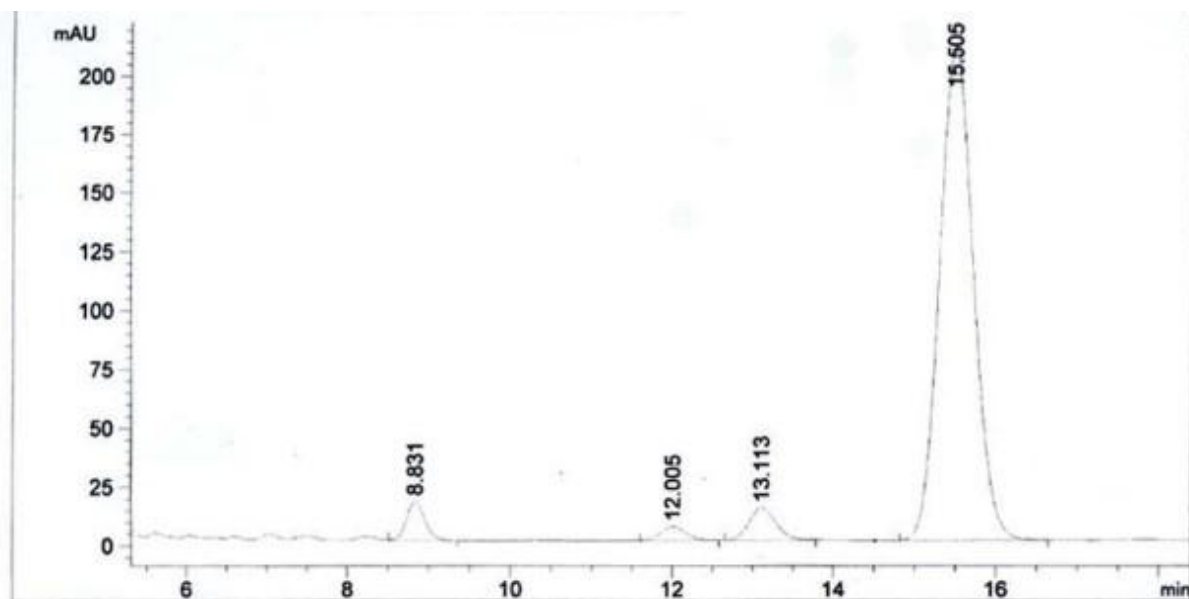

| # | [min]  |    | [min]  | mAU        | *s        | [mAU ]  | % |
|---|--------|----|--------|------------|-----------|---------|---|
| 1 | 8.831  | VB | 0.2413 | 260.33157  | 16.58973  | 3.8231  |   |
| 2 | 12.005 | BB | 0.3415 | 133.20288  | 6.04572   | 1.9562  |   |
| 3 | 13.113 | BB | 0.3701 | 331.46655  | 13.96321  | 4.8678  |   |
| 4 | 15.505 | BB | 0.4505 | 6084.39600 | 210.66946 | 89.3529 |   |

**Methyl 3-((diethoxyphosphoryl)amino)-3-(3-chlorophenyl)-2-methyl-2-nitropropanoate (6e):**

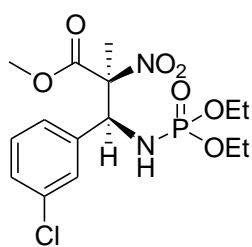

White solid; mp 89-92 °C;  $[\alpha]_D^{20} = 50.8^\circ$  ( $c = 0.005$ ,  $\text{CH}_2\text{Cl}_2$ );  $^1\text{H}$  NMR (300

MHz,  $\text{CDCl}_3$ )  $\delta$  7.35-7.43 (m, 1H), 7.28-7.35 (m, 3H), 4.66-4.99 (m, 2H),

3.75-3.99 (m, 6H), 3.58-3.74 (m, 1H), 1.72 (s, 3H), 1.21 (t,  $J = 7.0$  Hz, 3H), 1.07

(t,  $J = 7.0$  Hz, 3H);  $^{13}\text{C}$  NMR (101 MHz,  $\text{CDCl}_3$ )  $\delta$  165.84, 138.90, 134.52,

129.83, 128.90, 128.74, 126.83, 94.70 (d,  $J = 8.1$  Hz), 62.63 (d,  $J = 5.3$  Hz), 62.50 (d,  $J = 5.2$  Hz),

61.44, 53.73, 22.28, 16.00 (d,  $J = 7.4$  Hz), 15.79 (d,  $J = 7.4$  Hz);  $^{31}\text{P}$  NMR (162 MHz,  $\text{CDCl}_3$ )  $\delta$  5.87

(s), 5.65 (s); HRMS (MALDI) calculated for  $[\text{C}_{15}\text{H}_{22}\text{ClN}_2\text{O}_7\text{P}+\text{Na}]^+$ : 431.0751, Found 431.0748;

HPLC (Chiralcel AD-H, hexane/*i*PrOH, 85:15 v/v, 1.0mL/min, 23°C, UV 220 nm): tr (minor) = 8.626

min, tr (major) = 11.287 min, tr (major) = 14.668 min, tr (major) = 18.758 min.

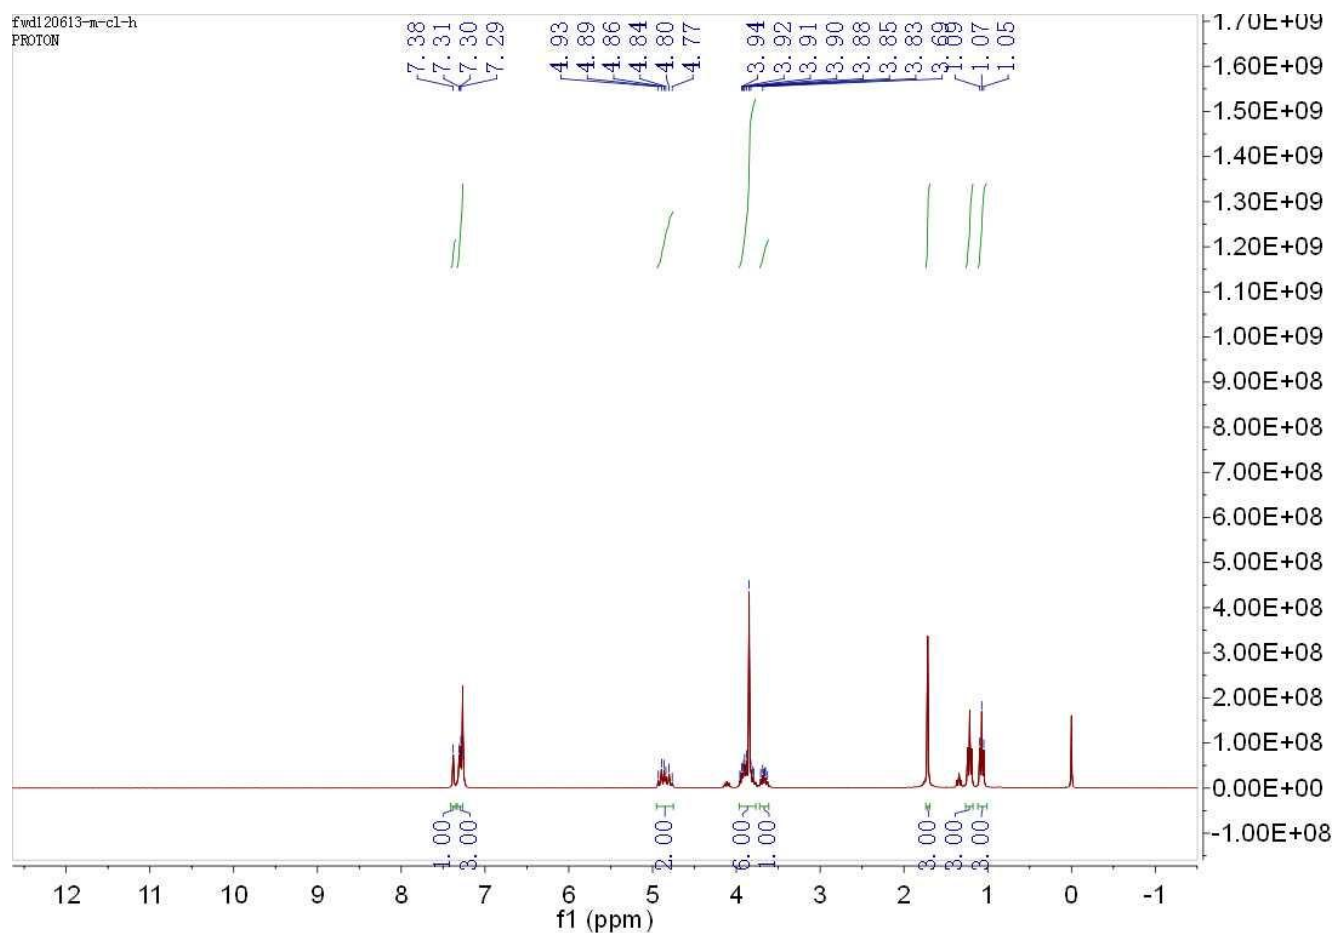

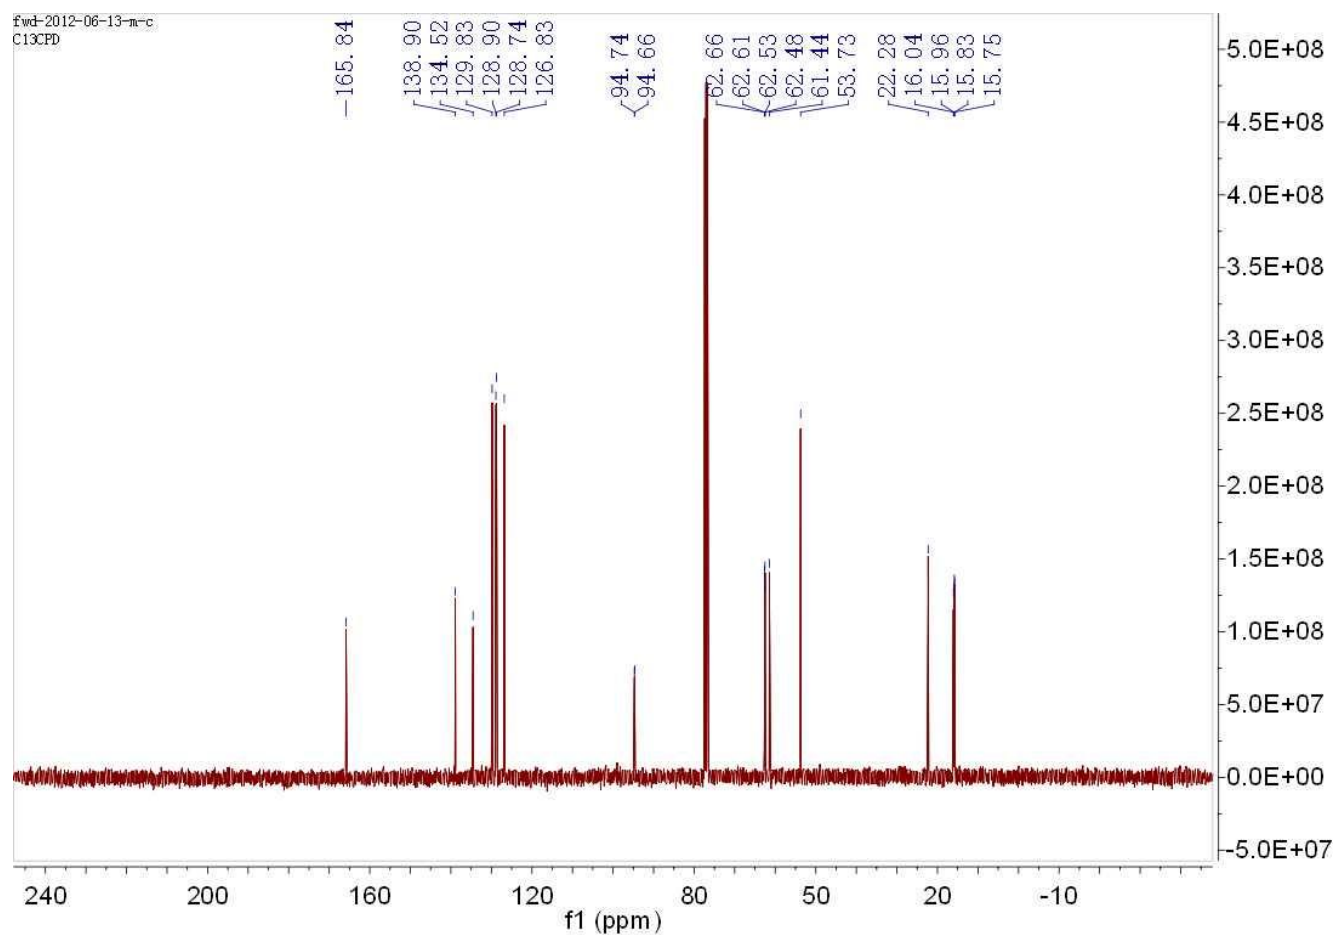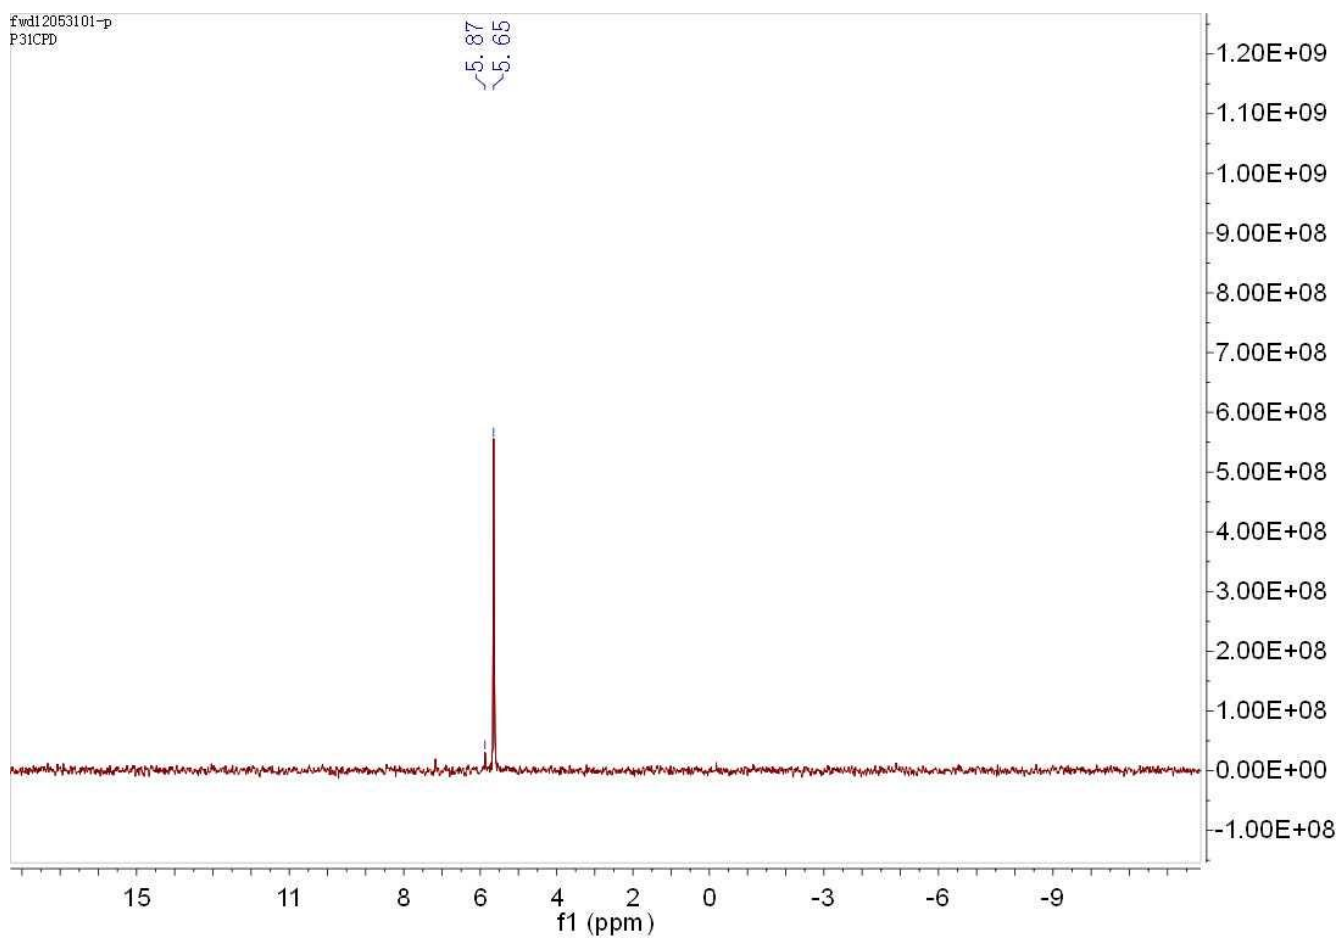

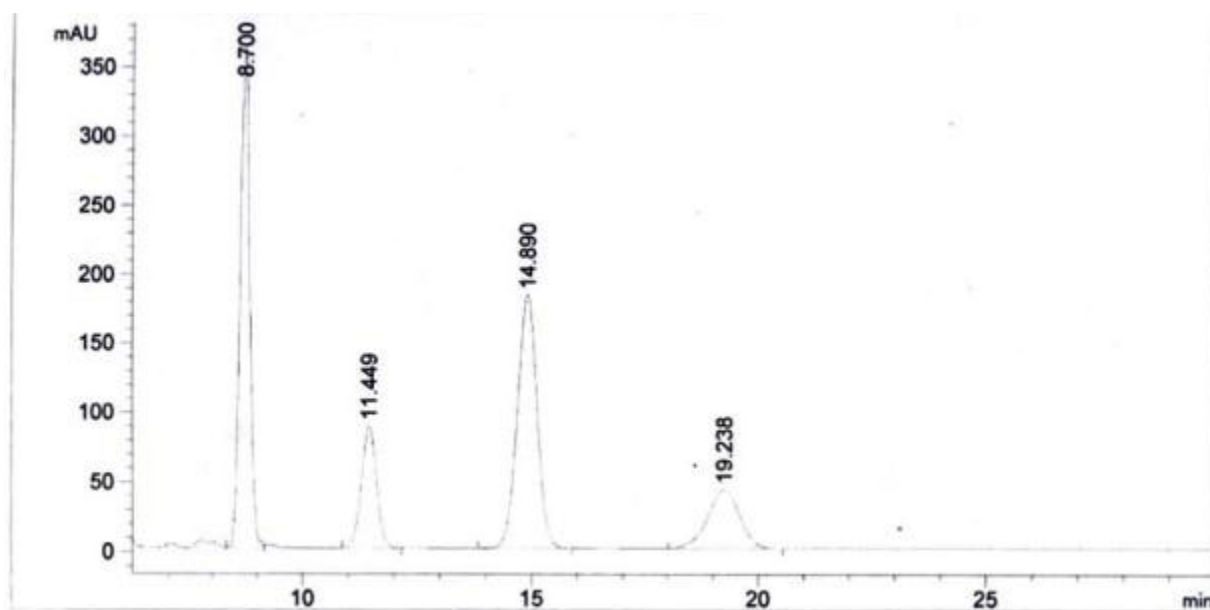

| # | [min]  |    | [min]  | mAU        | *s | [mAU ]    | %       |
|---|--------|----|--------|------------|----|-----------|---------|
| 1 | 8.700  | VV | 0.2319 | 5386.86914 |    | 361.85449 | 36.0214 |
| 2 | 11.449 | BB | 0.3571 | 2010.90027 |    | 87.43375  | 13.4467 |
| 3 | 14.890 | BB | 0.4638 | 5466.33447 |    | 182.86984 | 36.5528 |
| 4 | 19.238 | BB | 0.7664 | 2090.53931 |    | 42.47835  | 13.9792 |

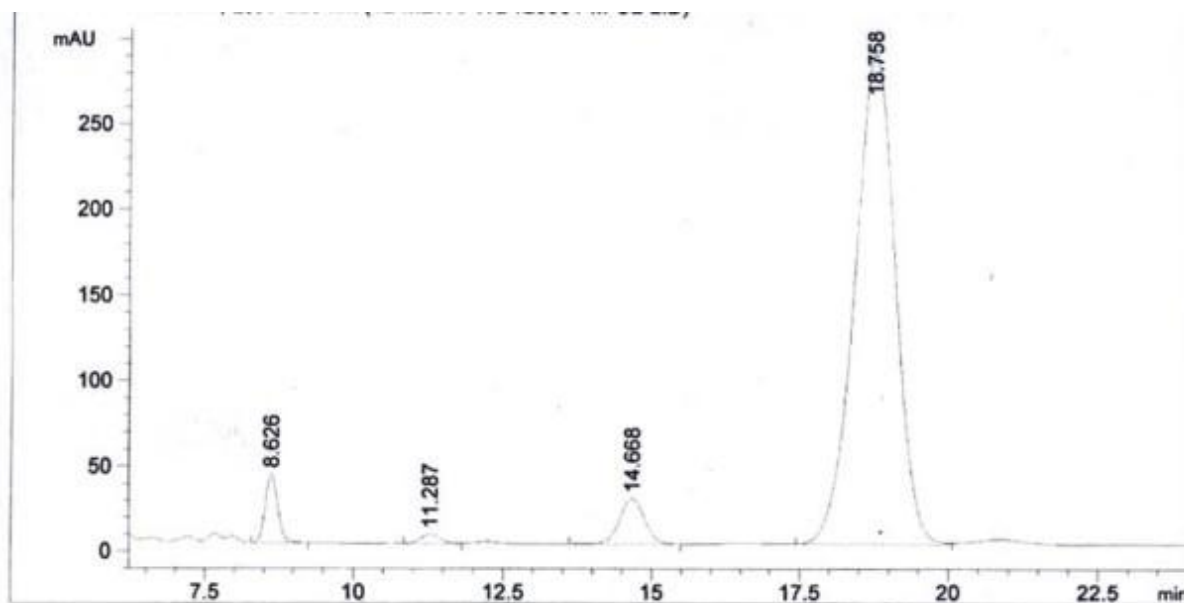

| # | [min]  |    | [min]  | mAU       | *s | [mAU ]    | %       |
|---|--------|----|--------|-----------|----|-----------|---------|
| 1 | 8.626  | VB | 0.2284 | 599.02533 |    | 40.73059  | 3.9190  |
| 2 | 11.287 | VV | 0.3470 | 128.95047 |    | 5.76222   | 0.8436  |
| 3 | 14.668 | BB | 0.4560 | 805.46228 |    | 27.43838  | 5.2696  |
| 4 | 18.758 | BB | 0.7377 | 1.37516e4 |    | 287.93399 | 89.9677 |

**Methyl 3-((diethoxyphosphoryl)amino)-3-(3-bromophenyl)-2-methyl-2-nitropropanoate (6f):**

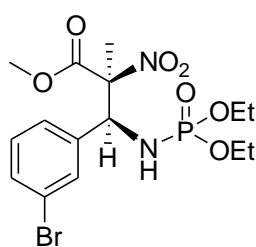

White solid; mp 73-75 °C;  $[\alpha]_D^{20} = 50.8^\circ$  ( $c = 0.005$ ,  $\text{CH}_2\text{Cl}_2$ );  $^1\text{H}$  NMR (400

MHz,  $\text{CDCl}_3$ )  $\delta$  7.50-7.56 (m, 1H), 7.43-7.50 (m, 1H), 7.28-7.34 (m, 1H),

7.19-7.25 (m, 1H), 4.88 (dd,  $J = 11.5, 9.2$  Hz, 1H), 4.79 (t,  $J = 11.5$  Hz, 1H),

3.76-3.97 (m, 6H), 3.62-3.72 (m, 1H), 1.72 (s, 3H), 1.22 (t,  $J = 7.0$  Hz, 3H), 1.07

(t,  $J = 7.0$  Hz, 3H);  $^{13}\text{C}$  NMR (101 MHz,  $\text{CDCl}_3$ )  $\delta$  165.83, 139.15, 131.85, 131.66, 130.11, 127.25,

122.61, 94.69 (d,  $J = 7.8$  Hz), 62.64 (d,  $J = 5.2$  Hz), 62.52 (d,  $J = 5.2$  Hz), 61.45, 53.74, 22.38, 16.02 (d,

$J = 7.5$  Hz), 15.81 (d,  $J = 7.5$  Hz);  $^{31}\text{P}$  NMR (162 MHz,  $\text{CDCl}_3$ )  $\delta$  5.87, 5.64; HRMS (MALDI)

calculated for  $[\text{C}_{15}\text{H}_{22}\text{BrN}_2\text{O}_7\text{P}+\text{Na}]^+$ : 475.0246, Found 475.0243; HPLC (Chiralcel AD-H,

hexane/*i*PrOH, 85:15 v/v, 1.0mL/min, 23°C, UV 220 nm): tr (minor) = 8.888 min, tr (major) = 11.594

min, tr (major) = 15.833 min, tr (major) = 21.252 min.

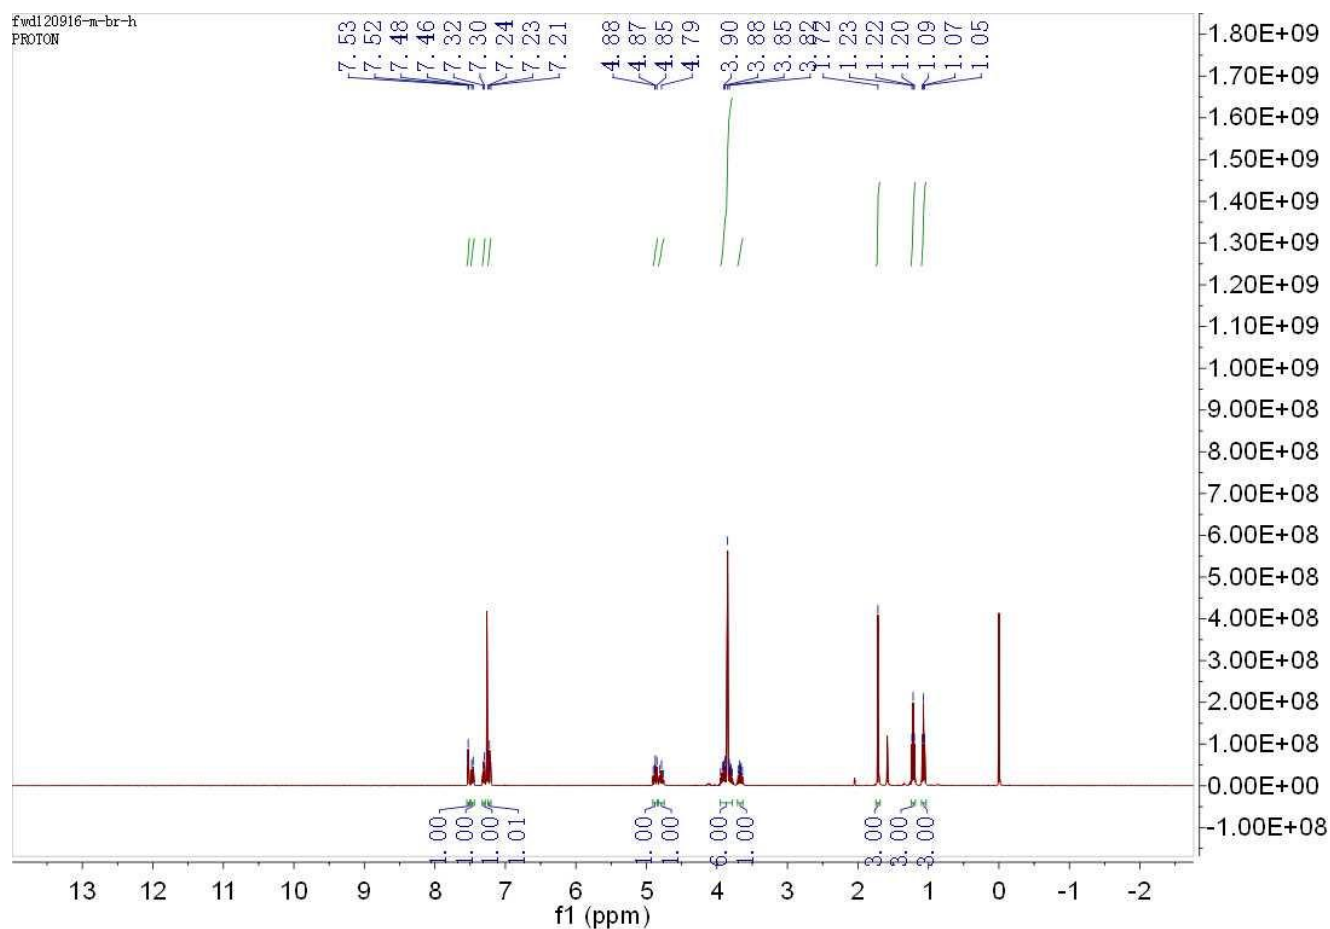

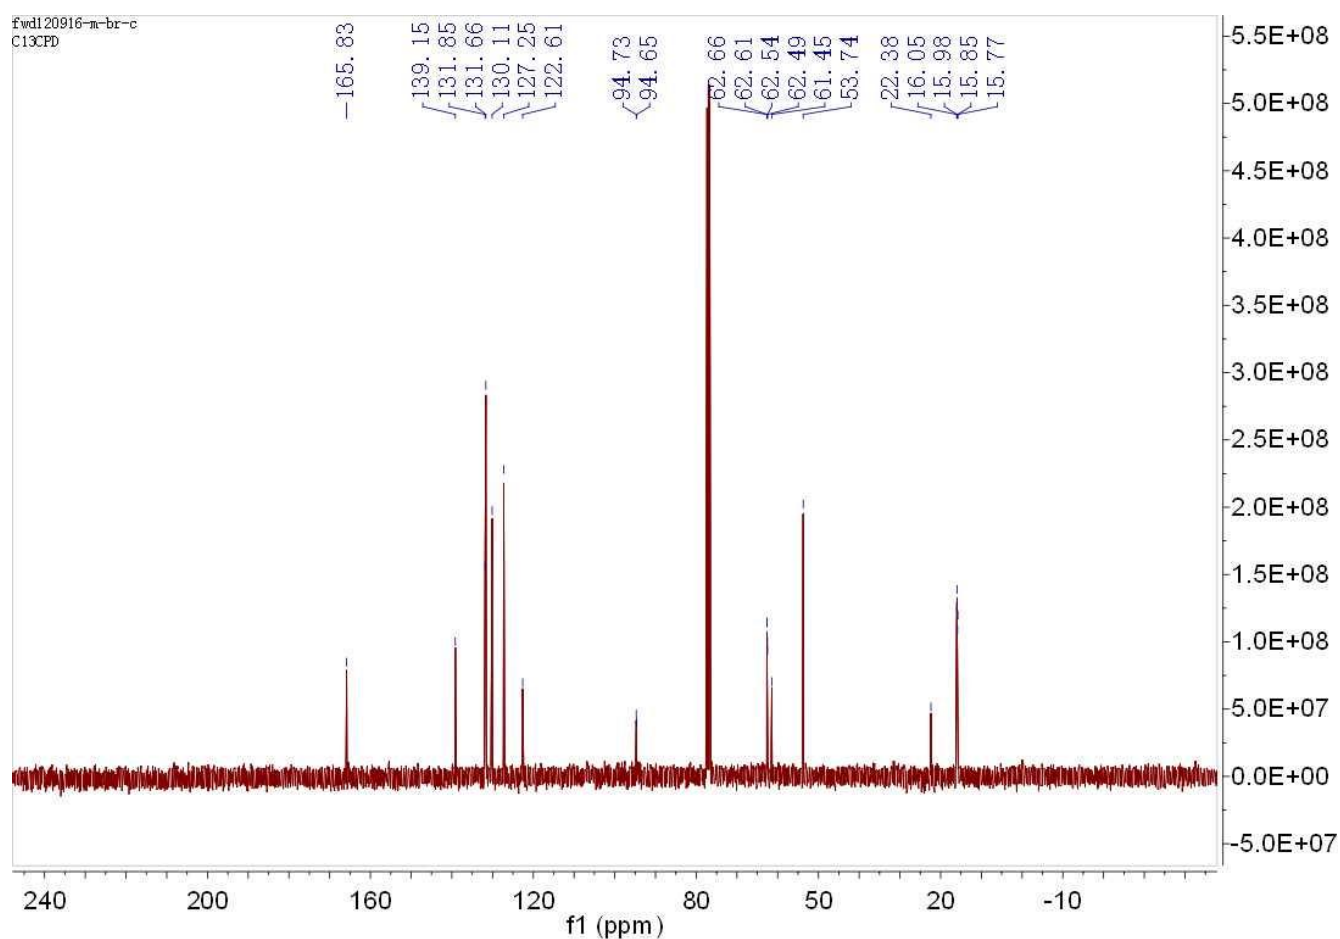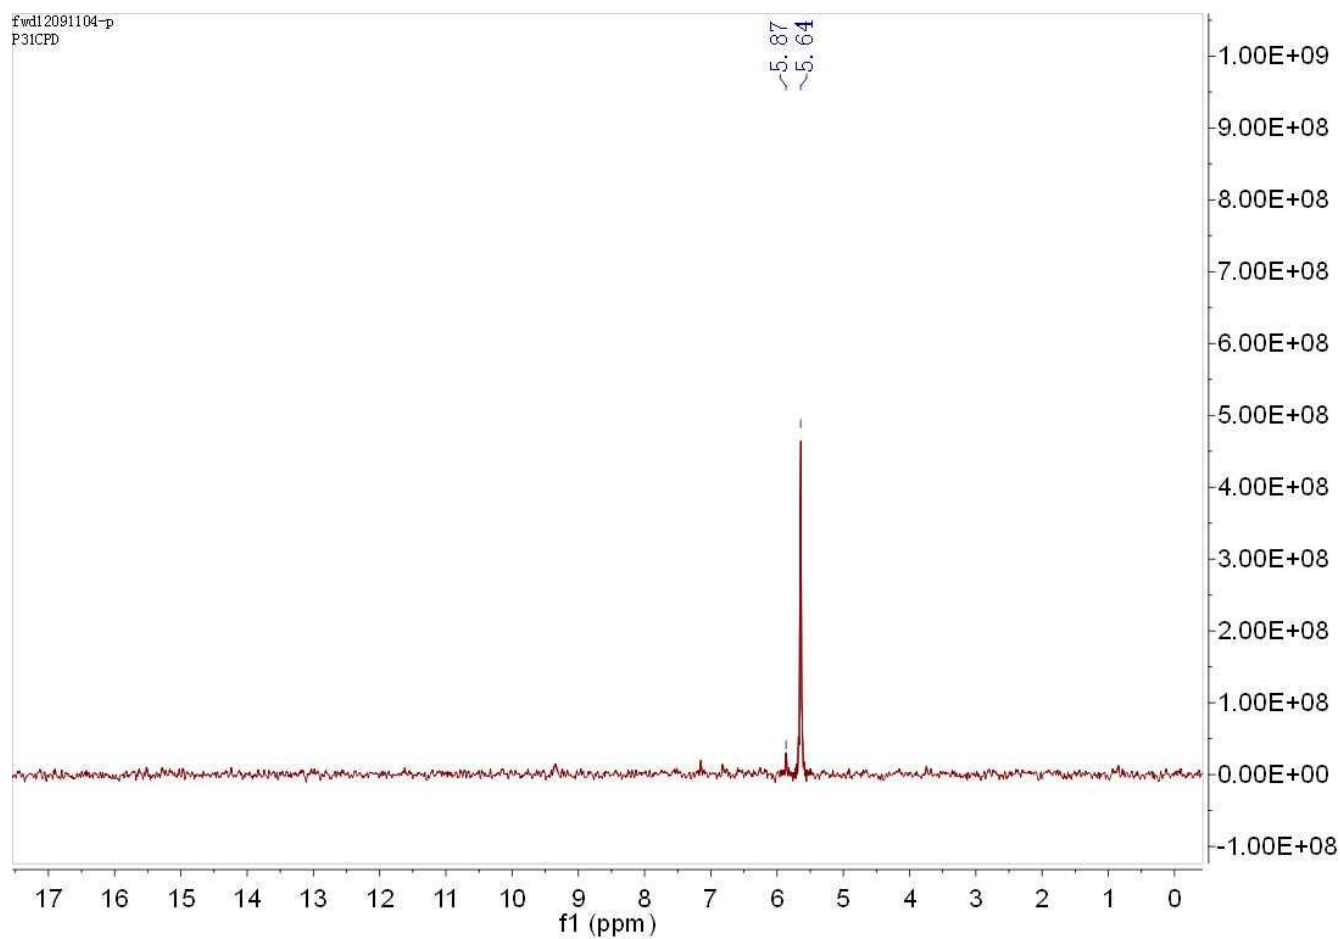

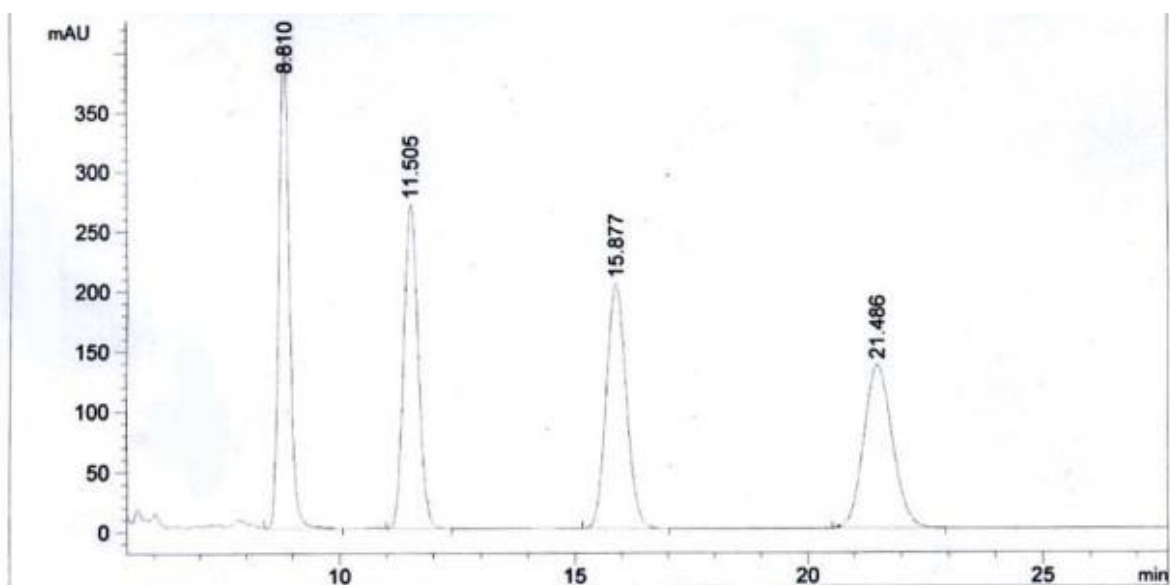

| # | [min]  |    | [min]  | mAU        | *s | [mAU ]    | %       |
|---|--------|----|--------|------------|----|-----------|---------|
| 1 | 8.810  | VB | 0.2400 | 6290.82178 |    | 403.71979 | 26.2784 |
| 2 | 11.505 | VB | 0.3342 | 5760.04395 |    | 269.01837 | 24.0612 |
| 3 | 15.877 | BB | 0.4656 | 6099.05176 |    | 203.81094 | 25.4773 |
| 4 | 21.486 | BB | 0.6606 | 5789.20752 |    | 135.75108 | 24.1830 |

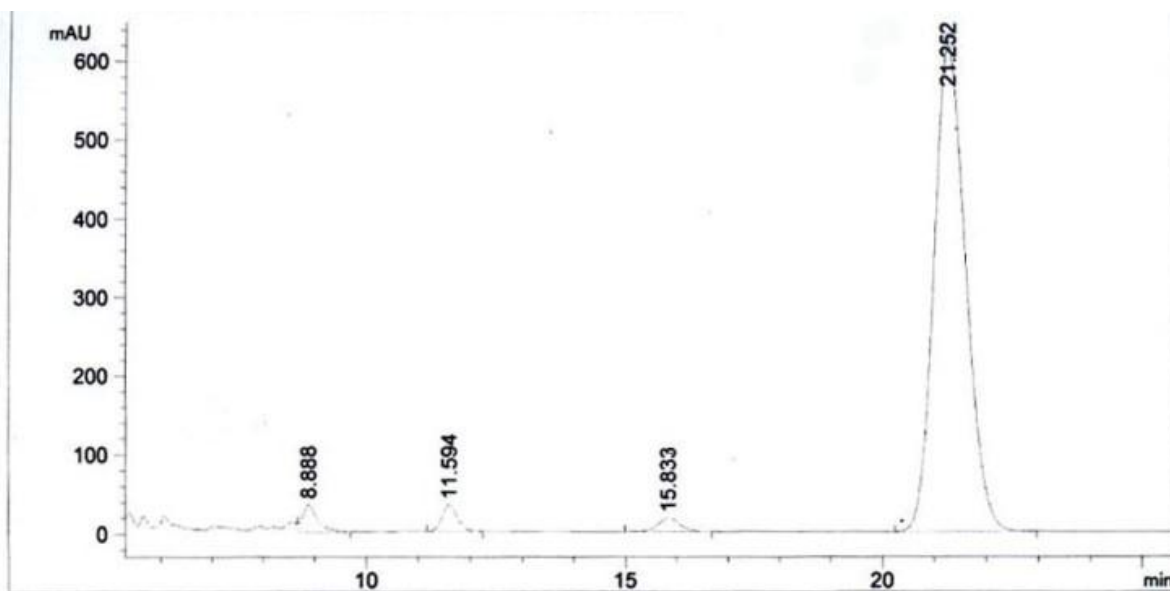

| # | [min]  |    | [min]  | mAU       | *s | [mAU ]    | %       |
|---|--------|----|--------|-----------|----|-----------|---------|
| 1 | 8.888  | VB | 0.2864 | 674.85675 |    | 34.07043  | 2.3926  |
| 2 | 11.594 | BB | 0.3223 | 689.35284 |    | 33.40004  | 2.4440  |
| 3 | 15.833 | BB | 0.4633 | 519.30255 |    | 17.18209  | 1.8411  |
| 4 | 21.252 | BB | 0.6634 | 2.63221e4 |    | 617.34601 | 93.3222 |

**Methyl 3-((diethylphosphoryl)amino)-3-(4-fluorophenyl)-2-methyl-2-nitropropanoate (6g):**

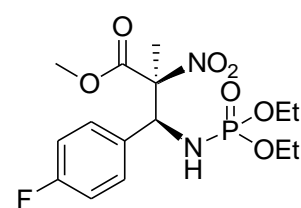

White solid; mp 99-102 °C;  $[\alpha]_D^{20} = 28.0^\circ$  ( $c = 0.005$ ,  $\text{CH}_2\text{Cl}_2$ );  $^1\text{H}$  NMR (400 MHz,  $\text{CDCl}_3$ )  $\delta$  7.34-7.42 (m, 2H), 7.01-7.11 (m, 2H), 4.93 (dd,  $J = 11.5, 9.2$  Hz, 1H), 4.80 (t,  $J = 11.5$  Hz, 1H), 3.77-3.98 (m, 6H), 3.62-3.73 (m, 1H), 1.72 (s, 3H), 1.22 (3,  $J = 7.2$  Hz, 3H), 1.09 (t,  $J = 7.2$  Hz, 3H);  $^{13}\text{C}$  NMR (101 MHz,  $\text{CDCl}_3$ )  $\delta$  165.94, 162.73 (d,  $J = 248.6$  Hz), 132.70, 130.35, 115.55, 94.84 (d,  $J = 8.1$  Hz), 62.58 (d,  $J = 5.3$  Hz), 62.49 (d,  $J = 5.3$  Hz), 61.38, 53.67, 22.48, 16.02 (d,  $J = 7.4$  Hz), 15.84 (d,  $J = 7.4$  Hz);  $^{31}\text{P}$  NMR (162 MHz,  $\text{CDCl}_3$ )  $\delta$  6.05, 5.84; HRMS (MALDI) calculated for  $[\text{C}_{15}\text{H}_{22}\text{FN}_2\text{O}_7\text{P} + \text{Na}]^+$ : 415.1046, Found 415.1044; HPLC (Chiralcel AD-H, hexane/*i*PrOH, 85:15 v/v, 1.0mL/min, 23°C, UV 220 nm):  $t_r$  (minor) = 11.789 min,  $t_r$  (major) = 17.388 min,  $t_r$  (major) = 19.970 min,  $t_r$  (major) = 21.001 min.

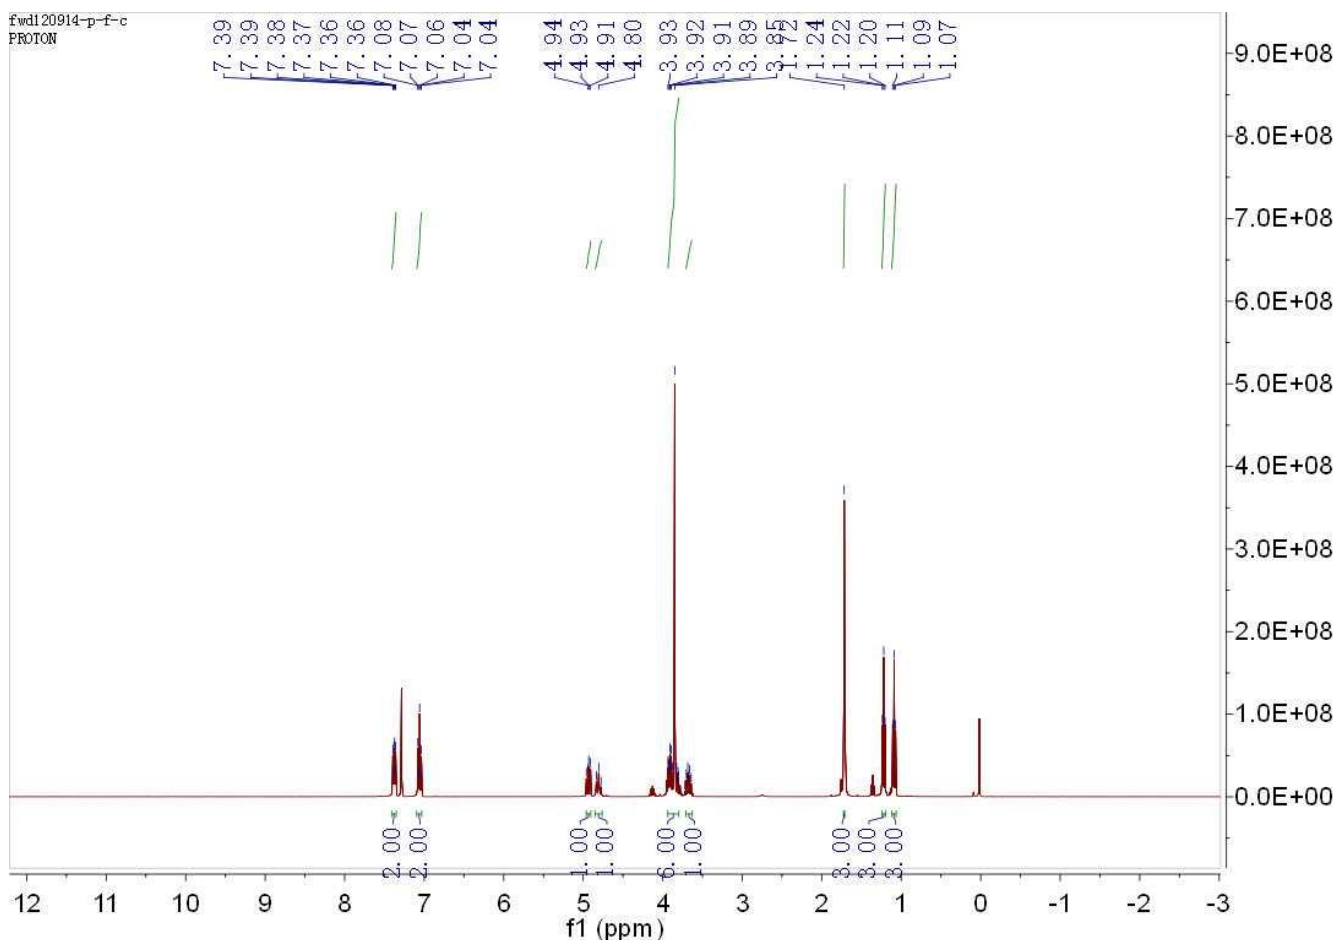

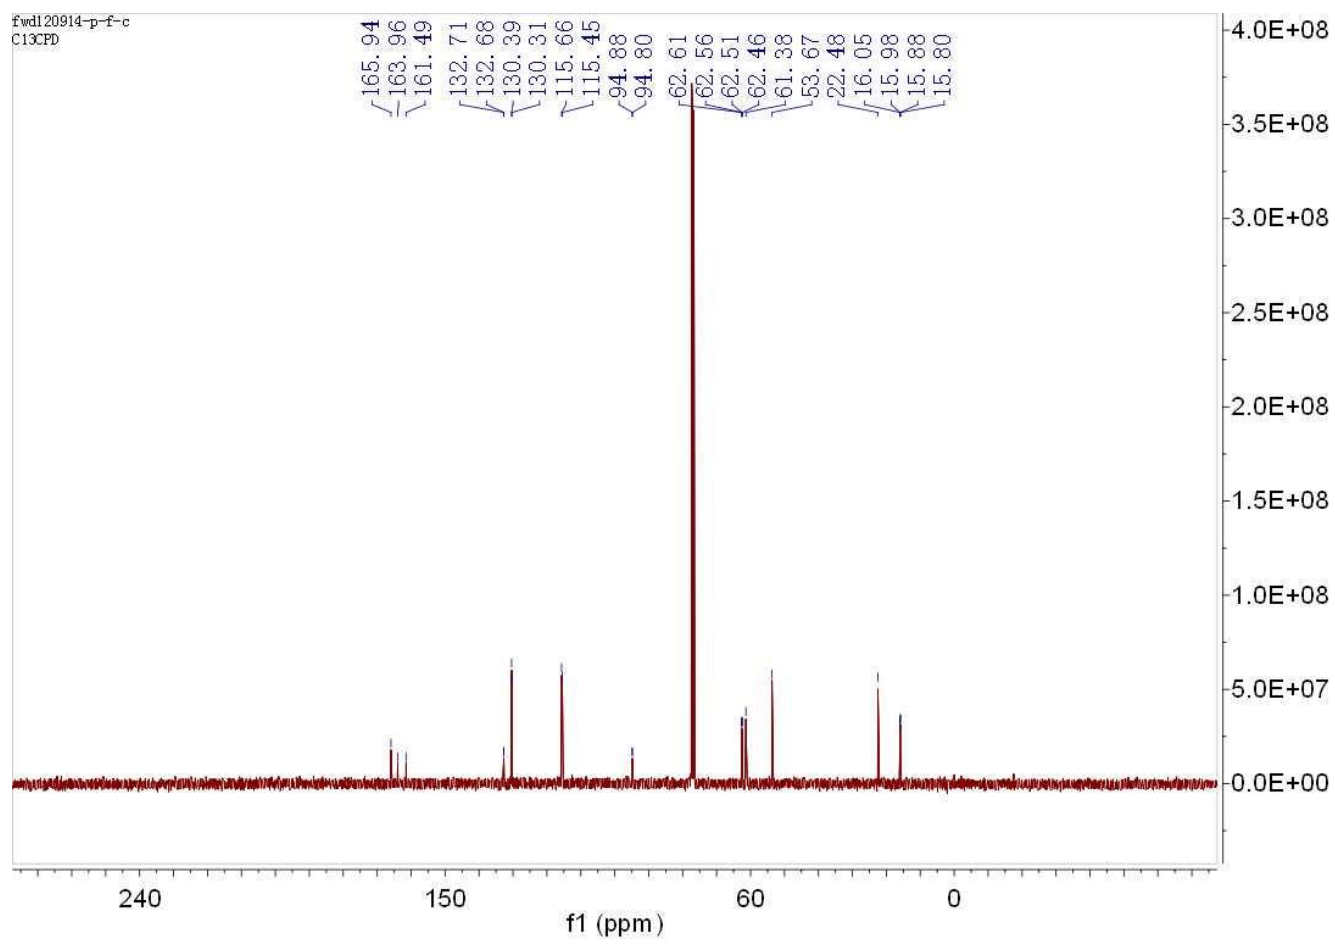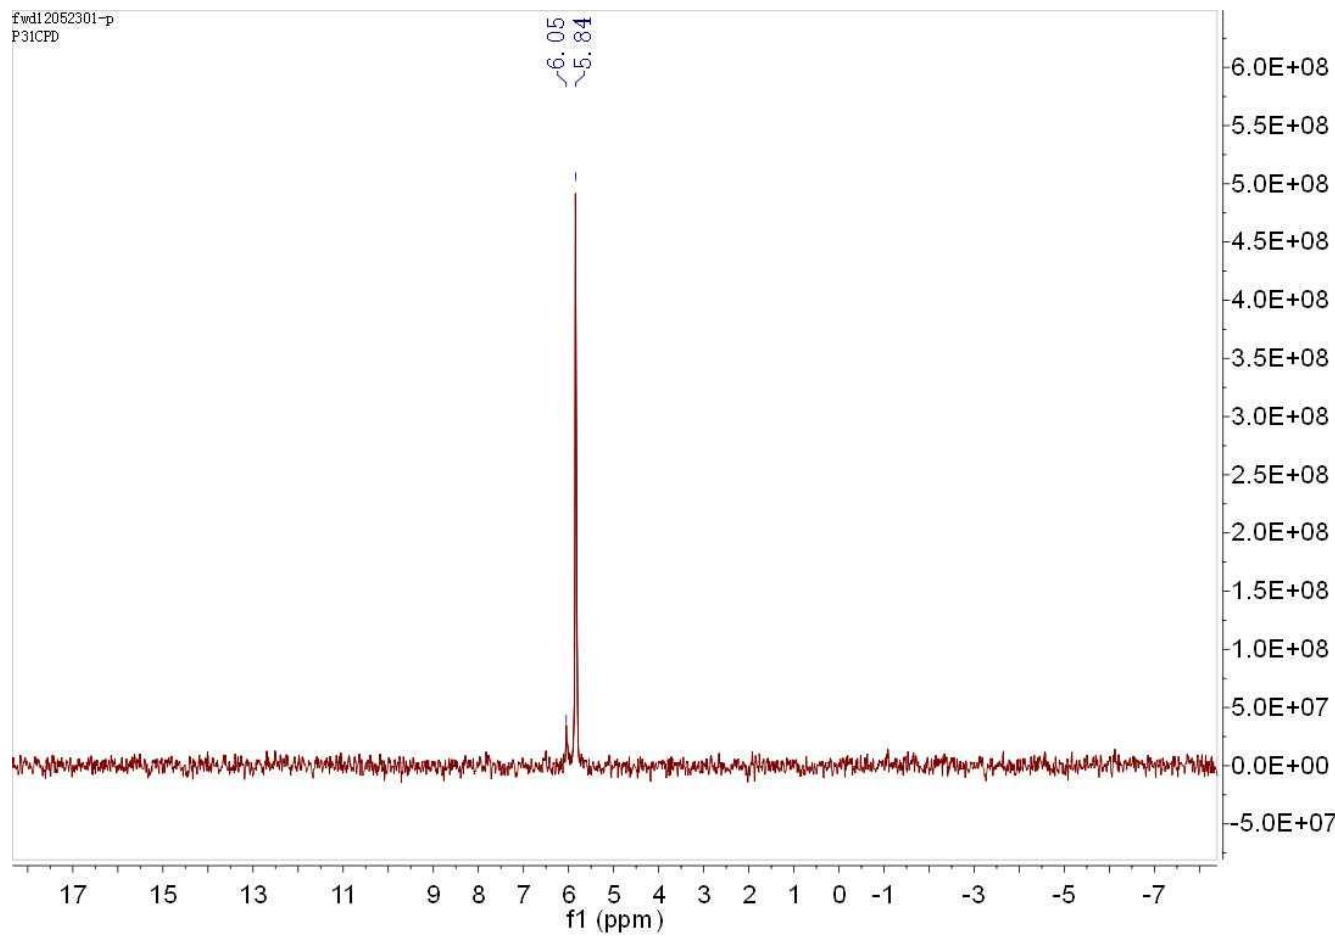

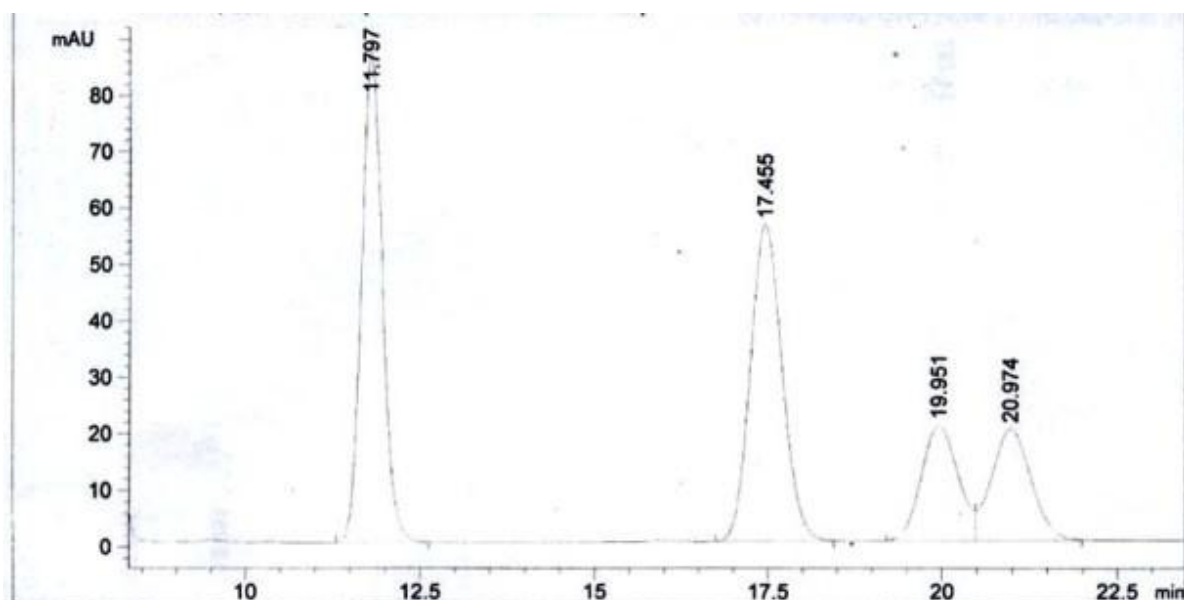

| # | [min]  |    | [min]  | mAU        | *s | [mAU ]   | %       |
|---|--------|----|--------|------------|----|----------|---------|
| 1 | 11.797 | BB | 0.3210 | 1808.09448 |    | 87.03419 | 35.2042 |
| 2 | 17.455 | BB | 0.4988 | 1797.73145 |    | 56.13455 | 35.0024 |
| 3 | 19.951 | BV | 0.5674 | 749.71240  |    | 20.52518 | 14.5972 |
| 4 | 20.974 | VB | 0.6012 | 780.47931  |    | 19.85799 | 15.1962 |

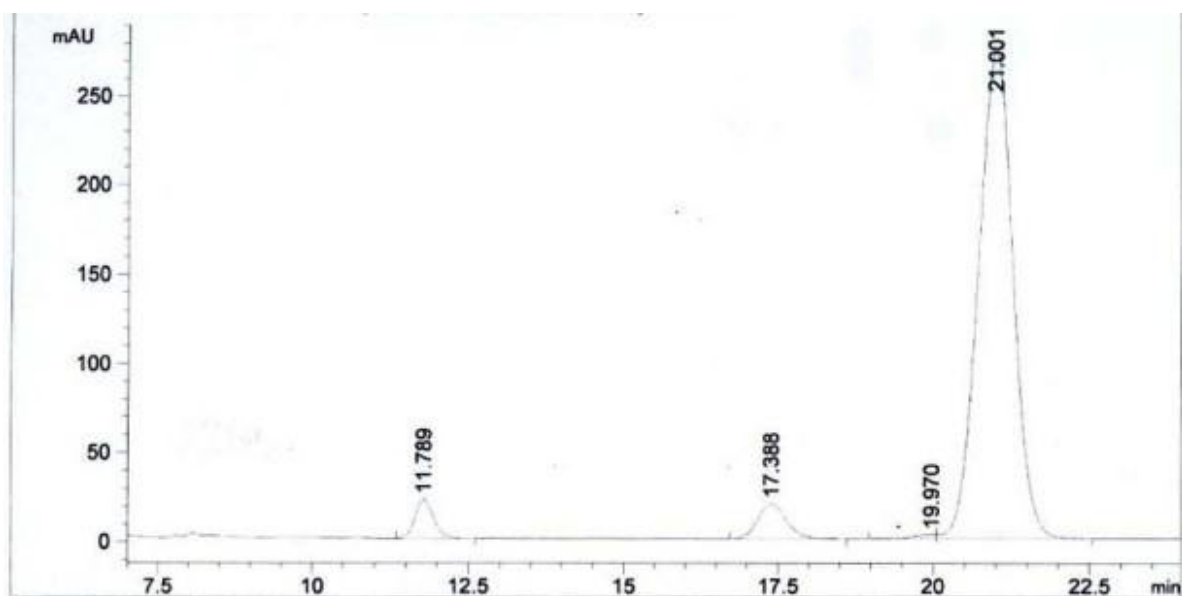

| # | [min]  |    | [min]  | mAU       | *s | [mAU ]    | %       |
|---|--------|----|--------|-----------|----|-----------|---------|
| 1 | 11.789 | BB | 0.3199 | 457.33142 |    | 22.11229  | 3.8728  |
| 2 | 17.388 | BB | 0.5012 | 642.14392 |    | 19.92486  | 5.4379  |
| 3 | 19.970 | BV | 0.3864 | 56.67465  |    | 2.23300   | 0.4799  |
| 4 | 21.001 | VB | 0.6044 | 1.06526e4 |    | 274.34323 | 90.2094 |

**Methyl 3-((diethylphosphoryl)amino)-3-(4-chlorophenyl)-2-methyl-2-nitropropanoate (6h):**

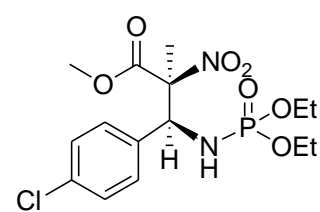

White solid; mp 103-105 °C;  $[\alpha]_D^{20} = 48.0^\circ$  ( $c = 0.005$ ,  $\text{CH}_2\text{Cl}_2$ );  $^1\text{H}$  NMR (300 MHz,  $\text{CDCl}_3$ )  $\delta$  7.28-7.38 (m, 4H), 4.90 (dd,  $J = 11.5, 9.3$  Hz, 1H), 4.79 (t,  $J = 11.5$  Hz, 1H), 3.75-3.98 (m, 6H), 3.61-3.73 (m, 1H), 1.70 (s, 3H), 1.21 (t,  $J = 7.0$  Hz, 3H), 1.08 (t,  $J = 7.0$  Hz, 3H);  $^{13}\text{C}$  NMR (101 MHz,  $\text{CDCl}_3$ )  $\delta$  165.87, 135.33, 134.74, 129.96, 128.76, 94.73 (d,  $J = 7.9$  Hz), 62.64 (d,  $J = 5.3$  Hz), 62.54 (d,  $J = 5.3$  Hz), 61.40 (d,  $J = 2.2$  Hz), 53.71, 22.38, 16.02 (d,  $J = 7.4$  Hz), 15.85 (d,  $J = 7.4$  Hz);  $^{31}\text{P}$  NMR (162 MHz,  $\text{CDCl}_3$ )  $\delta$  5.85, 5.63; HRMS (MALDI) calculated for  $[\text{C}_{15}\text{H}_{22}\text{ClN}_2\text{O}_7\text{P}+\text{Na}]^+$ : 431.0751, Found 431.0747; HPLC (Chiralcel AD-H, hexane/*i*PrOH, 85:15 v/v, 1.0mL/min, 23°C, UV 220 nm): tr (minor) = 12.390 min, tr (major) = 17.051 min, tr (major) = 21.081 min, tr (major) = 23.011 min.

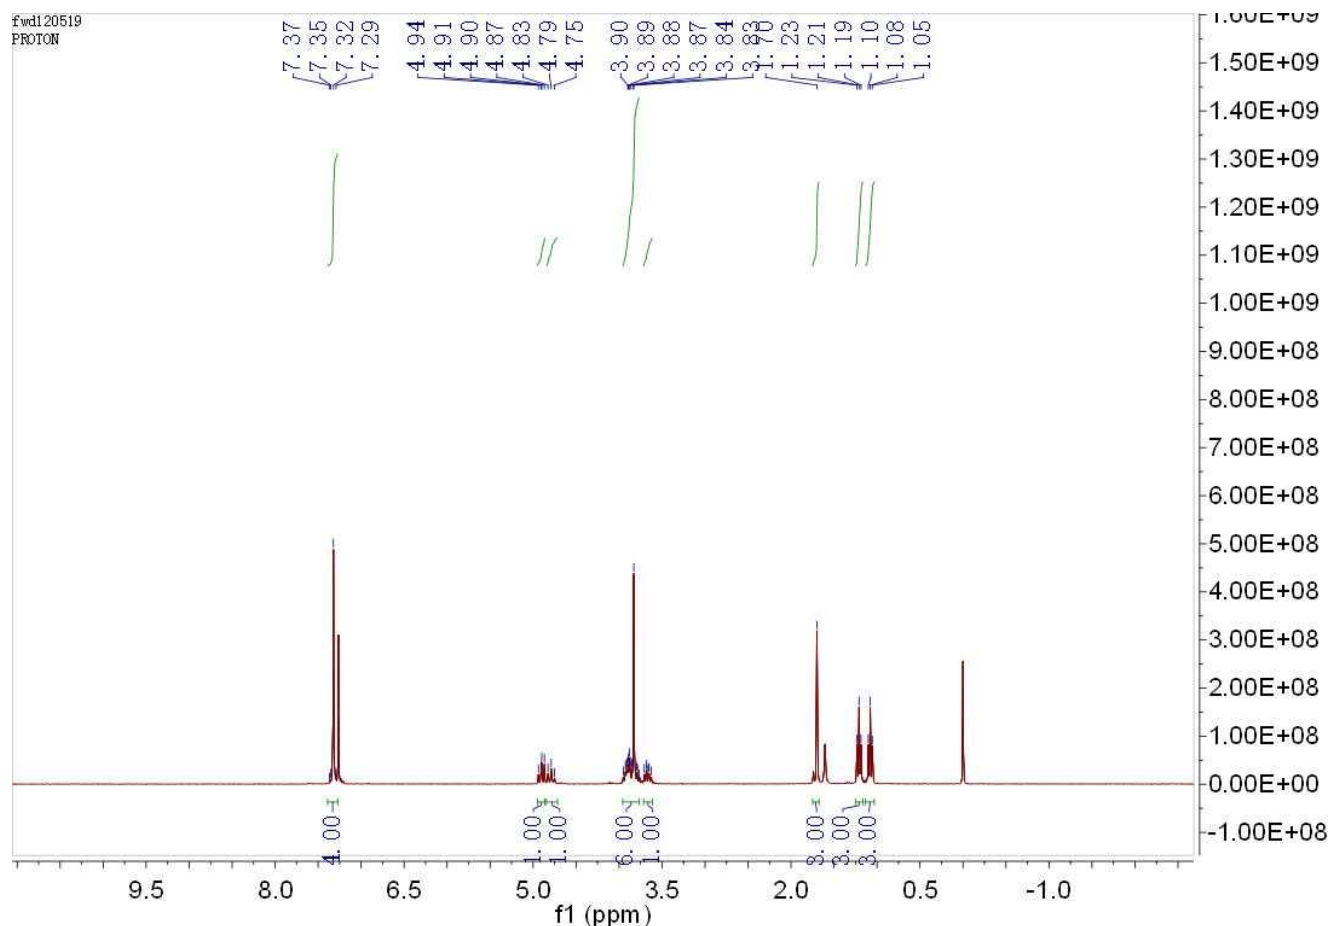

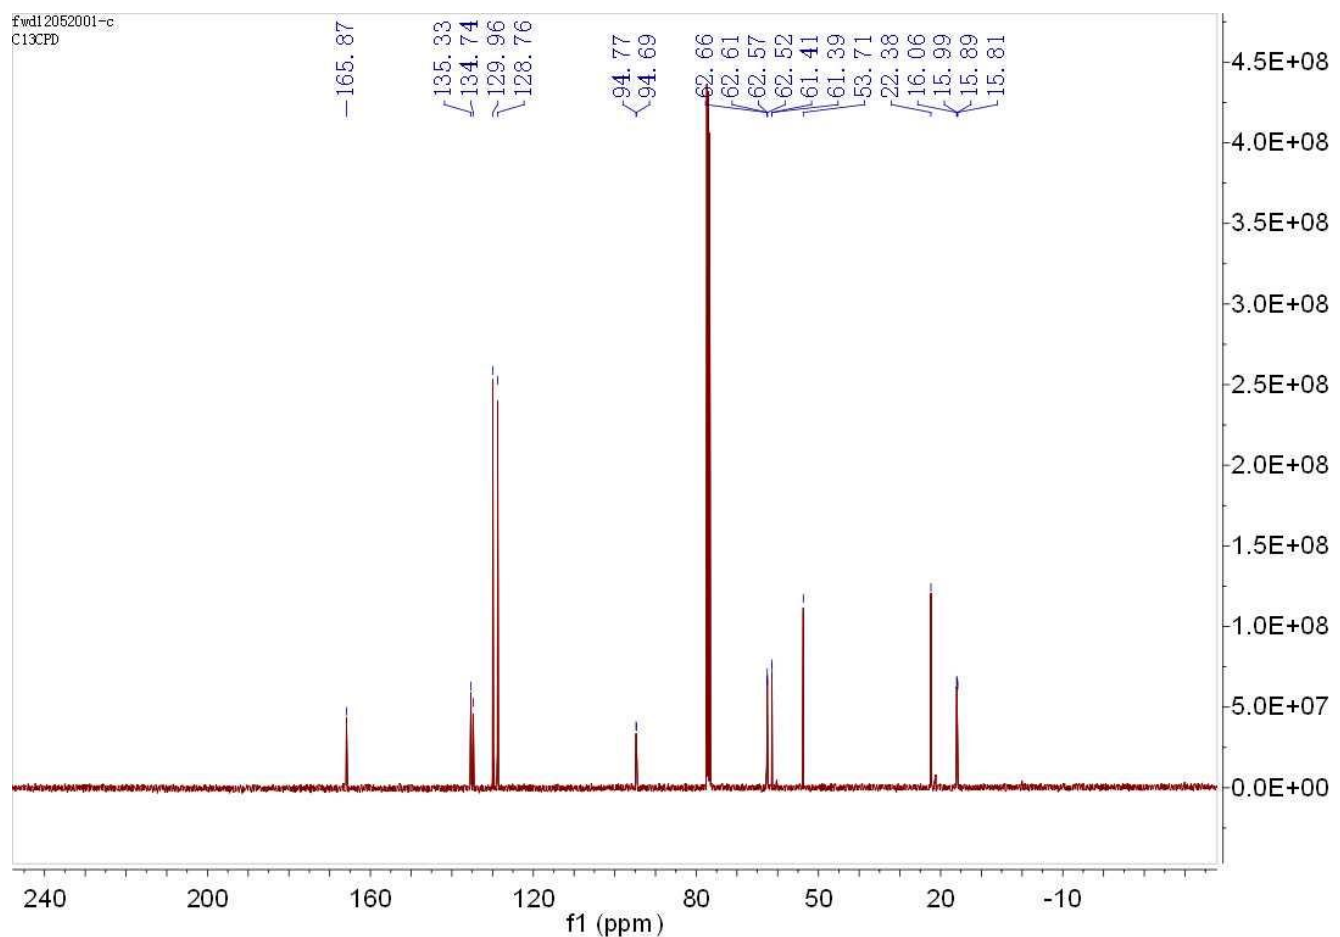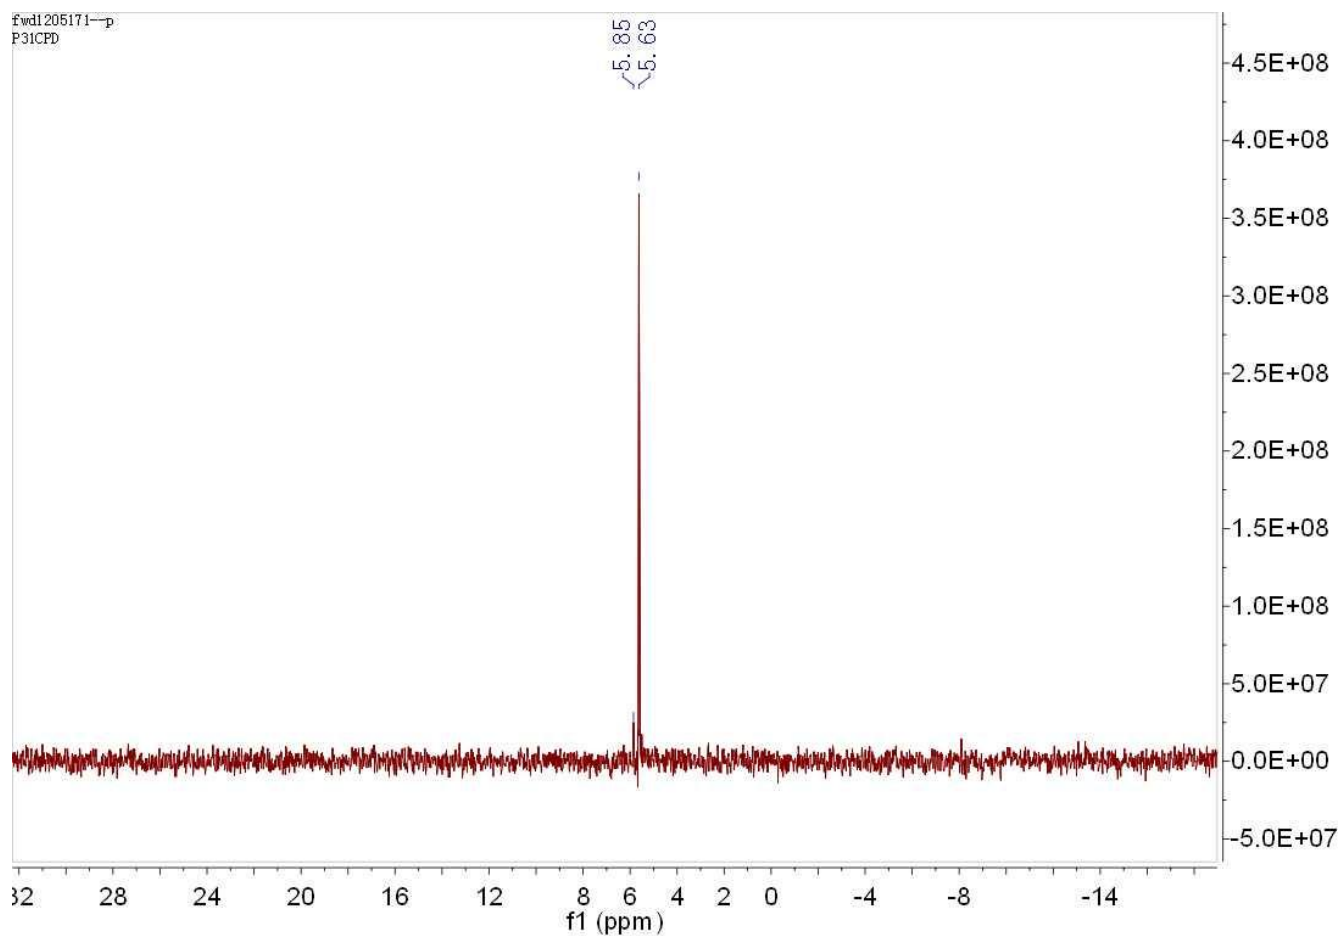

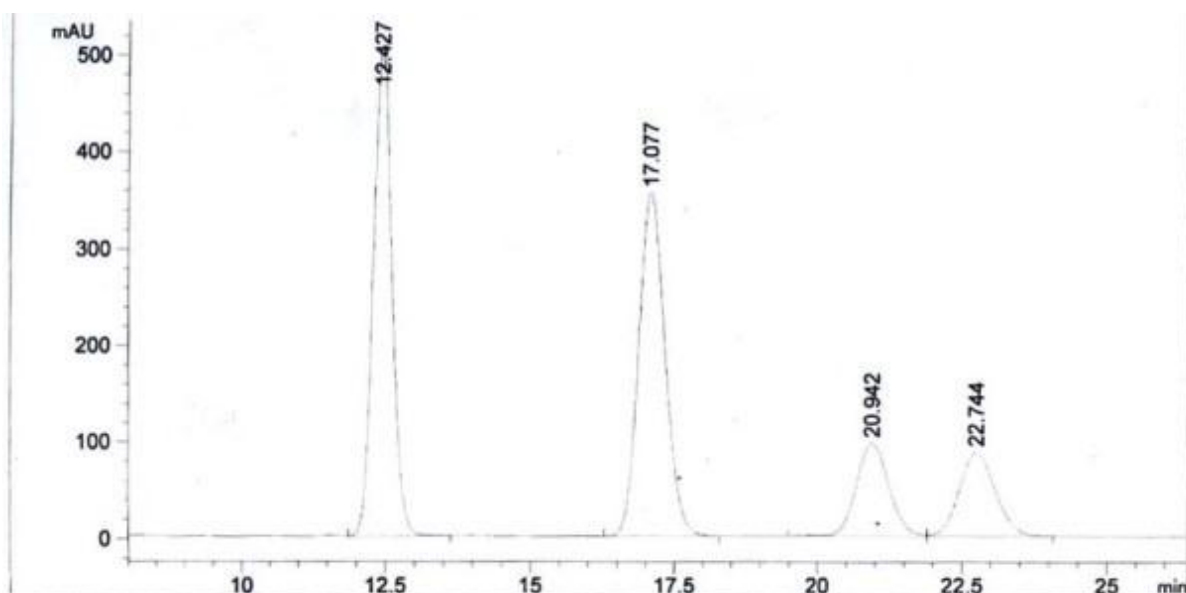

| # | [min]  |    | [min]  | mAU        | *s | [mAU ]    | %       |
|---|--------|----|--------|------------|----|-----------|---------|
| 1 | 12.427 | VB | 0.3476 | 1.14037e4  |    | 508.34262 | 37.6240 |
| 2 | 17.077 | BB | 0.4974 | 1.13861e4  |    | 355.56967 | 37.5659 |
| 3 | 20.942 | BV | 0.6097 | 3773.66455 |    | 96.07207  | 12.4503 |
| 4 | 22.744 | VB | 0.6720 | 3746.22656 |    | 86.62969  | 12.3598 |

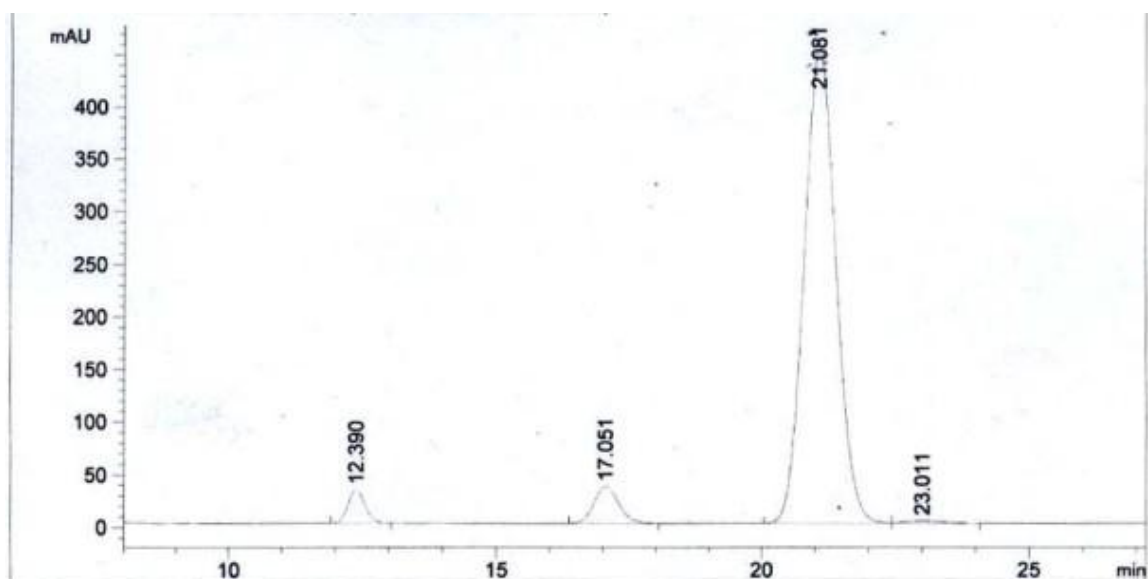

| # | [min]  |    | [min]  | mAU        | *s | [mAU ]    | %       |
|---|--------|----|--------|------------|----|-----------|---------|
| 1 | 12.390 | BB | 0.3444 | 699.04413  |    | 31.55050  | 3.3673  |
| 2 | 17.051 | BB | 0.5038 | 1138.90894 |    | 35.09845  | 5.4861  |
| 3 | 21.081 | BB | 0.6466 | 1.88088e4  |    | 452.44757 | 90.6016 |
| 4 | 23.011 | BB | 0.6723 | 113.14812  |    | 2.44524   | 0.5450  |



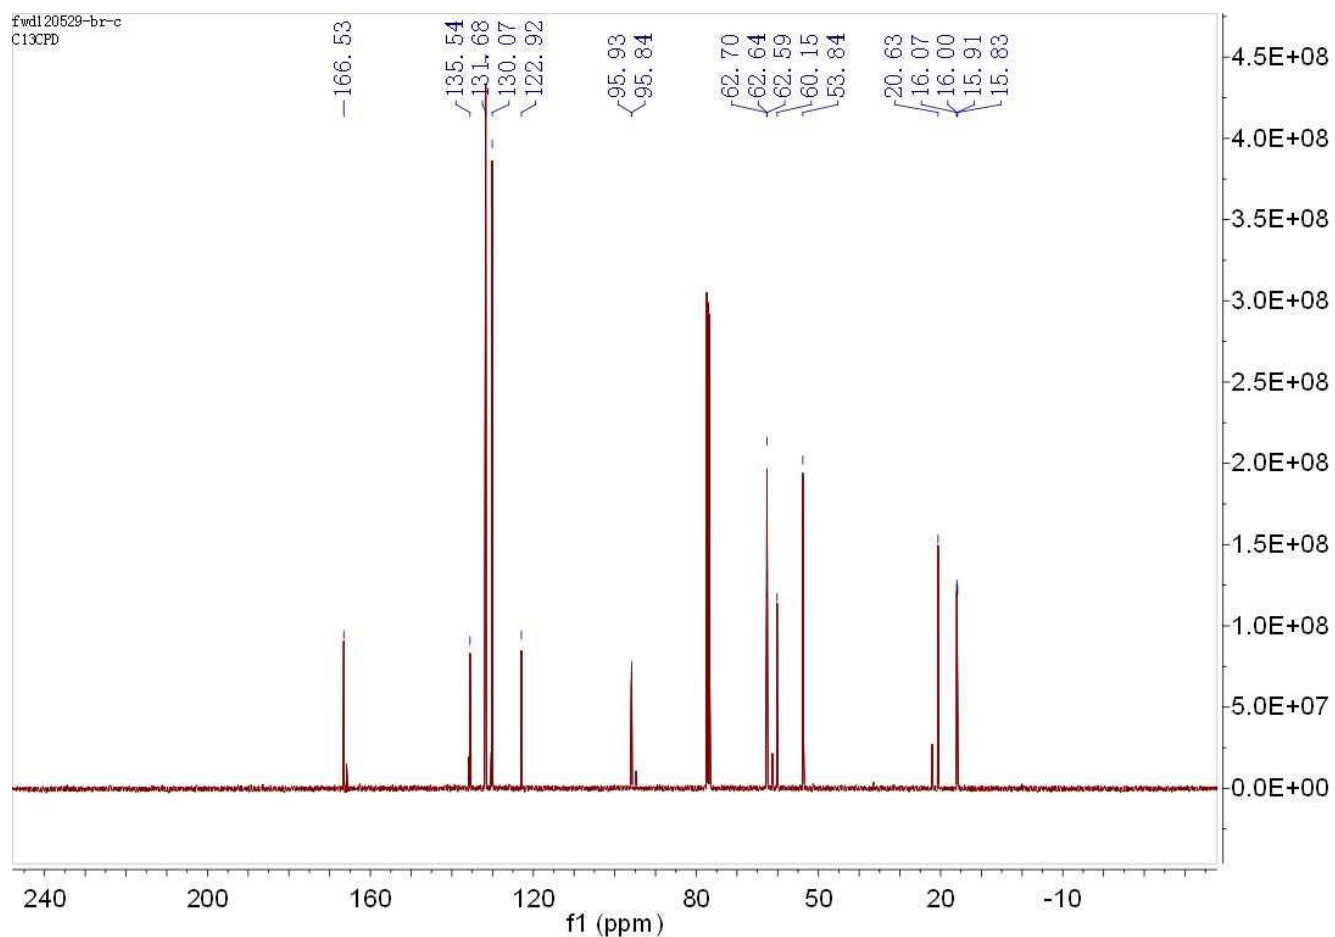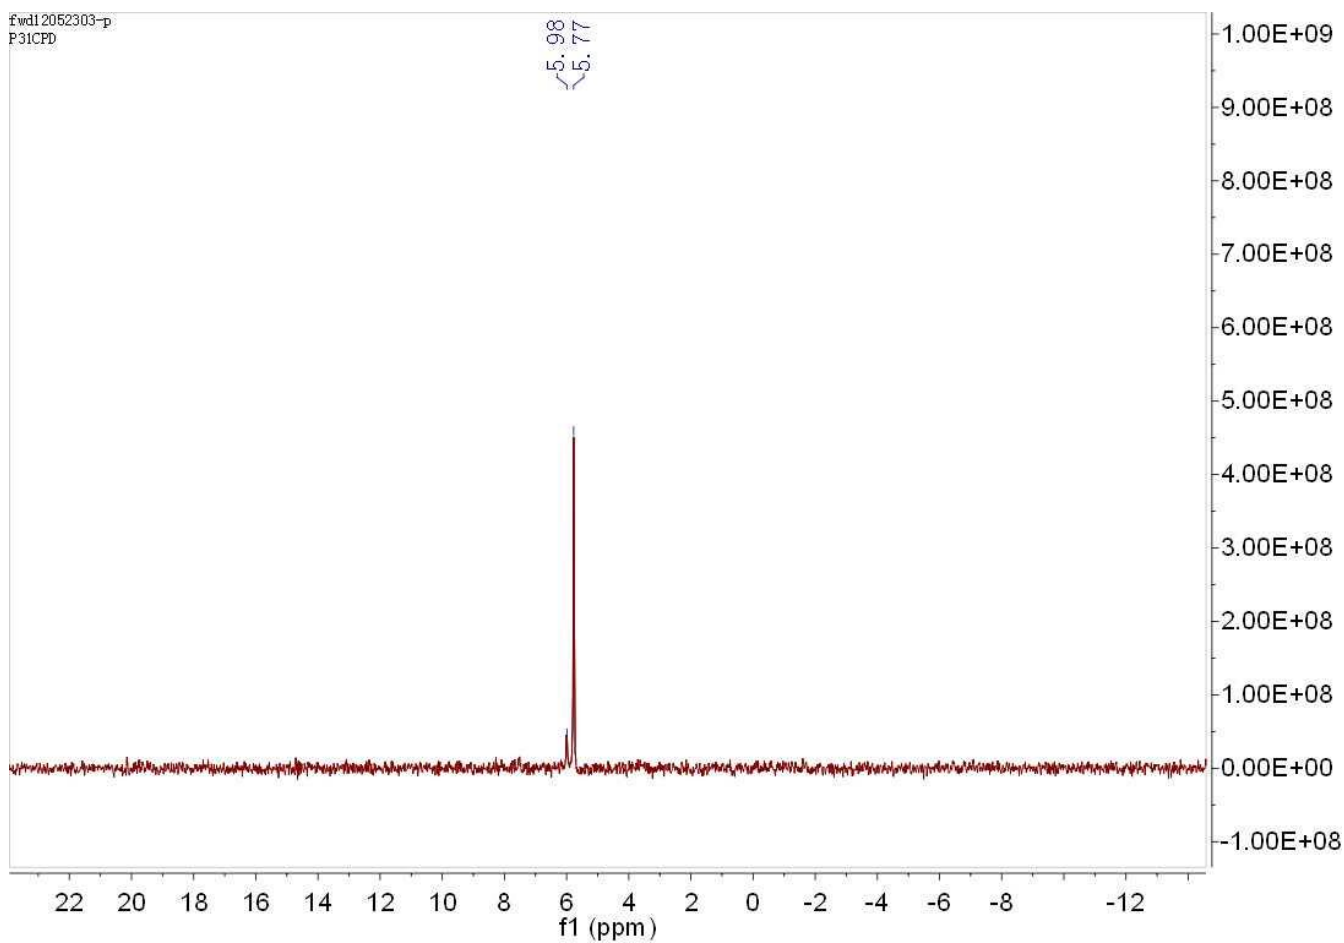

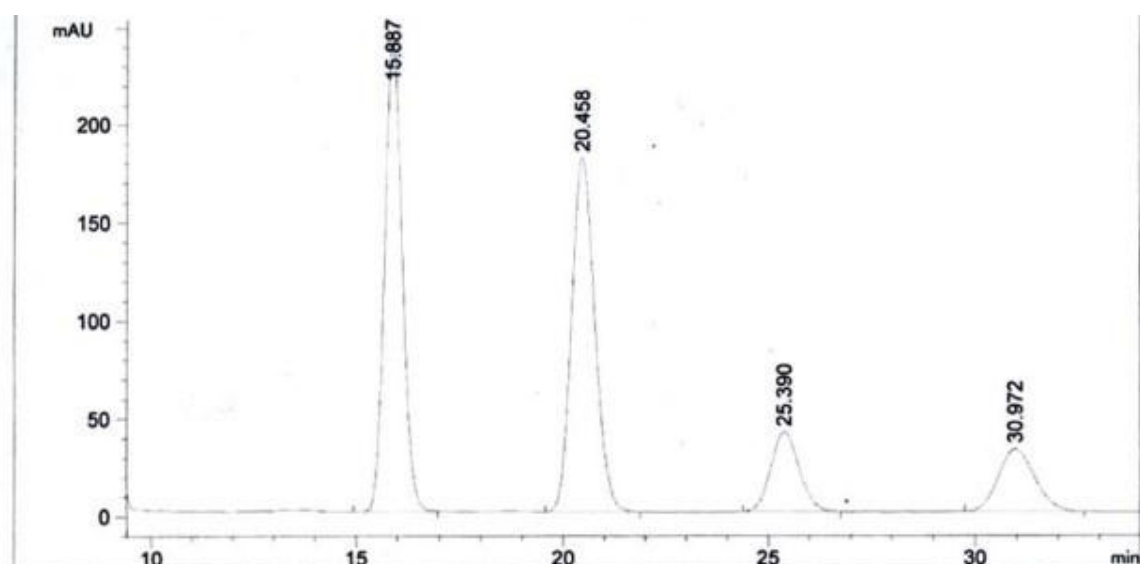

| # | [min]  |    | [min]  | mAU        | *s | [mAU ]    | %       |
|---|--------|----|--------|------------|----|-----------|---------|
| 1 | 15.887 | VB | 0.4616 | 7147.87402 |    | 240.61142 | 39.0839 |
| 2 | 20.458 | BB | 0.6094 | 7138.79443 |    | 181.27058 | 39.0342 |
| 3 | 25.390 | BB | 0.7590 | 1997.45386 |    | 41.00712  | 10.9219 |
| 4 | 30.972 | BB | 0.9628 | 2004.43896 |    | 32.36461  | 10.9601 |

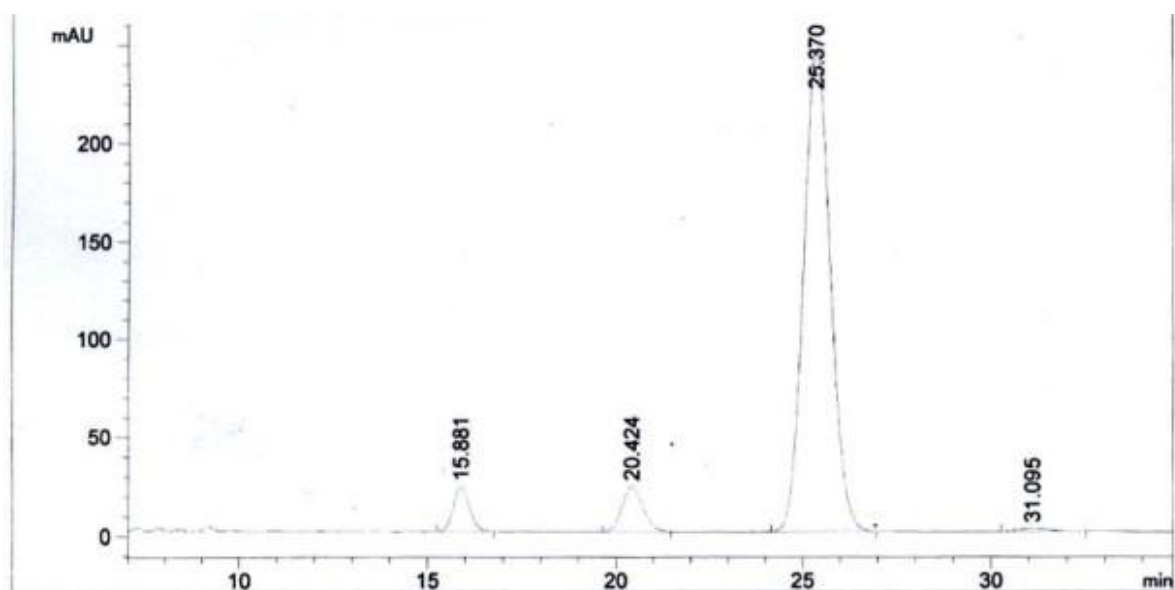

| # | [min]  |    | [min]  | mAU       | *s | [mAU ]    | %       |
|---|--------|----|--------|-----------|----|-----------|---------|
| 1 | 15.881 | BB | 0.4571 | 673.04498 |    | 22.76204  | 4.8610  |
| 2 | 20.424 | BB | 0.6090 | 889.49597 |    | 22.74982  | 6.4242  |
| 3 | 25.370 | BB | 0.7702 | 1.22108e4 |    | 246.47144 | 88.1902 |
| 4 | 31.095 | BB | 0.6341 | 72.63612  |    | 1.37420   | 0.5246  |

**Methyl 3-((diethylphosphoryl)amino)-2-methyl-2-nitro-3-(*p*-tolyl)propanoate (6j):**

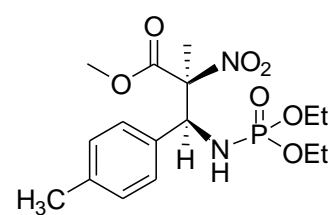

White solid; mp 100-103 °C;  $[\alpha]_D^{20} = 44.0^\circ$  ( $c = 0.005$ ,  $\text{CH}_2\text{Cl}_2$ );  $^1\text{H}$  NMR (400 MHz,  $\text{CDCl}_3$ )  $\delta$  7.23-7.27 (m, 2H), 7.14-7.19 (m, 2H), 4.87-4.95 (m, 1H), 4.81 (t,  $J = 11.4$  Hz, 1H), 3.77-3.99 (m, 6H), 3.57-3.66 (m, 1H), 2.36 (s, 3H), 1.71 (s, 3H), 1.23 (t,  $J = 7.0$  Hz, 3H), 1.07 (t,  $J = 7.0$  Hz, 3H);  $^{13}\text{C}$  NMR (101 MHz,  $\text{CDCl}_3$ )  $\delta$  166.00, 138.59, 133.69, 129.26, 128.35, 94.97 (d,  $J = 8.1$  Hz), 62.47 (d,  $J = 5.1$  Hz), 62.37 (d,  $J = 4.9$  Hz), 61.74, 53.57, 22.60, 21.09, 16.03 (d,  $J = 7.4$  Hz), 15.80 (d,  $J = 7.4$  Hz);  $^{31}\text{P}$  NMR (162 MHz,  $\text{CDCl}_3$ )  $\delta$  6.07, 5.87; HRMS (MALDI) calculated for  $[\text{C}_{16}\text{H}_{25}\text{N}_2\text{O}_7\text{P}+\text{Na}]^+$ : 411.1297, Found 411.1293; HPLC (Chiralcel AD-H, hexane/*i*PrOH, 85:15 v/v, 1.0mL/min, 23°C, UV 220 nm): tr (minor) = 11.737 min, tr (major) = 14.974 min, tr (major) = 19.705 min, tr (major) = 24.333 min.

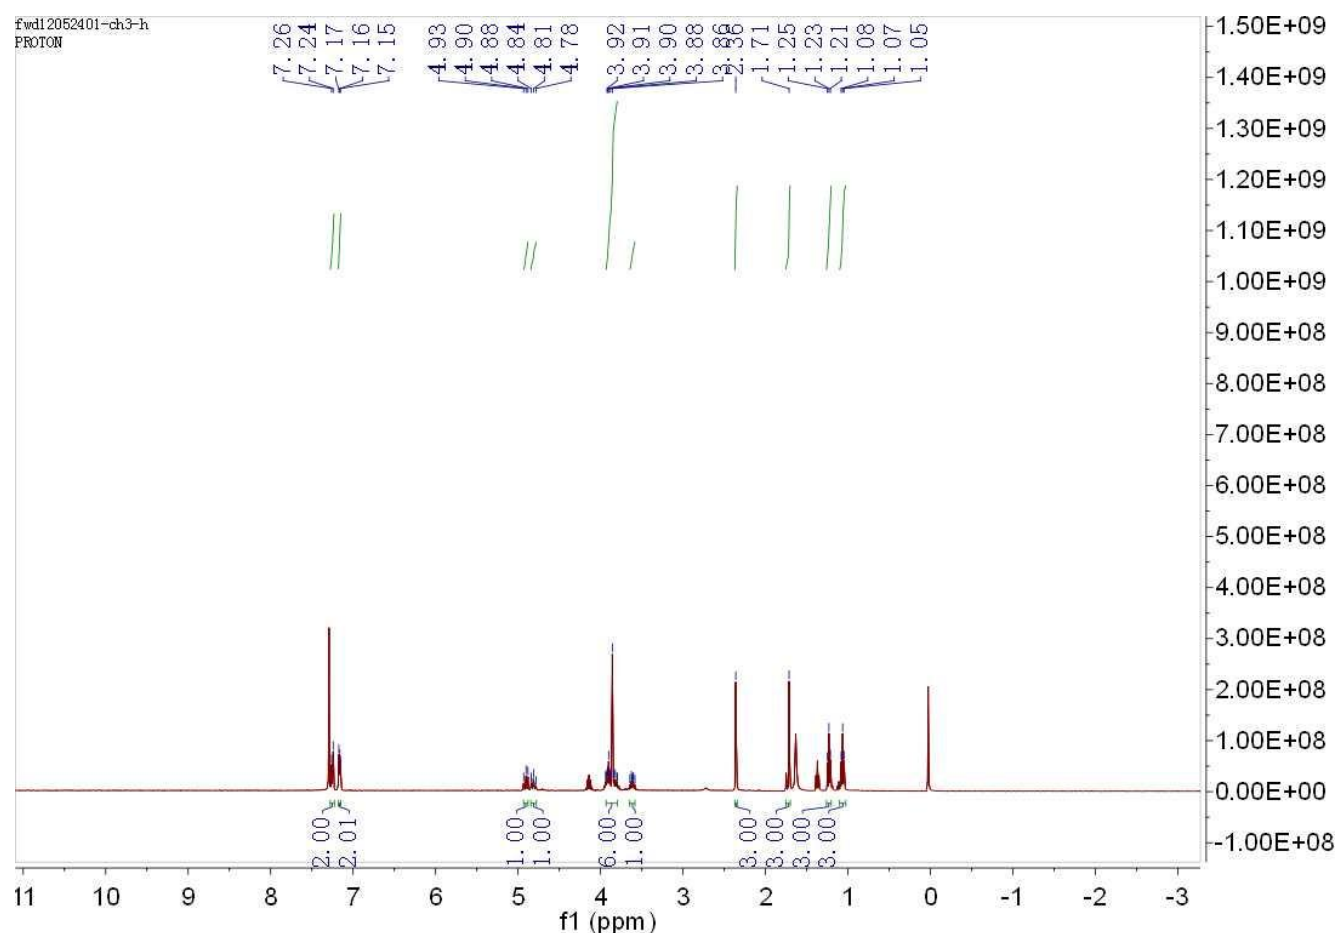

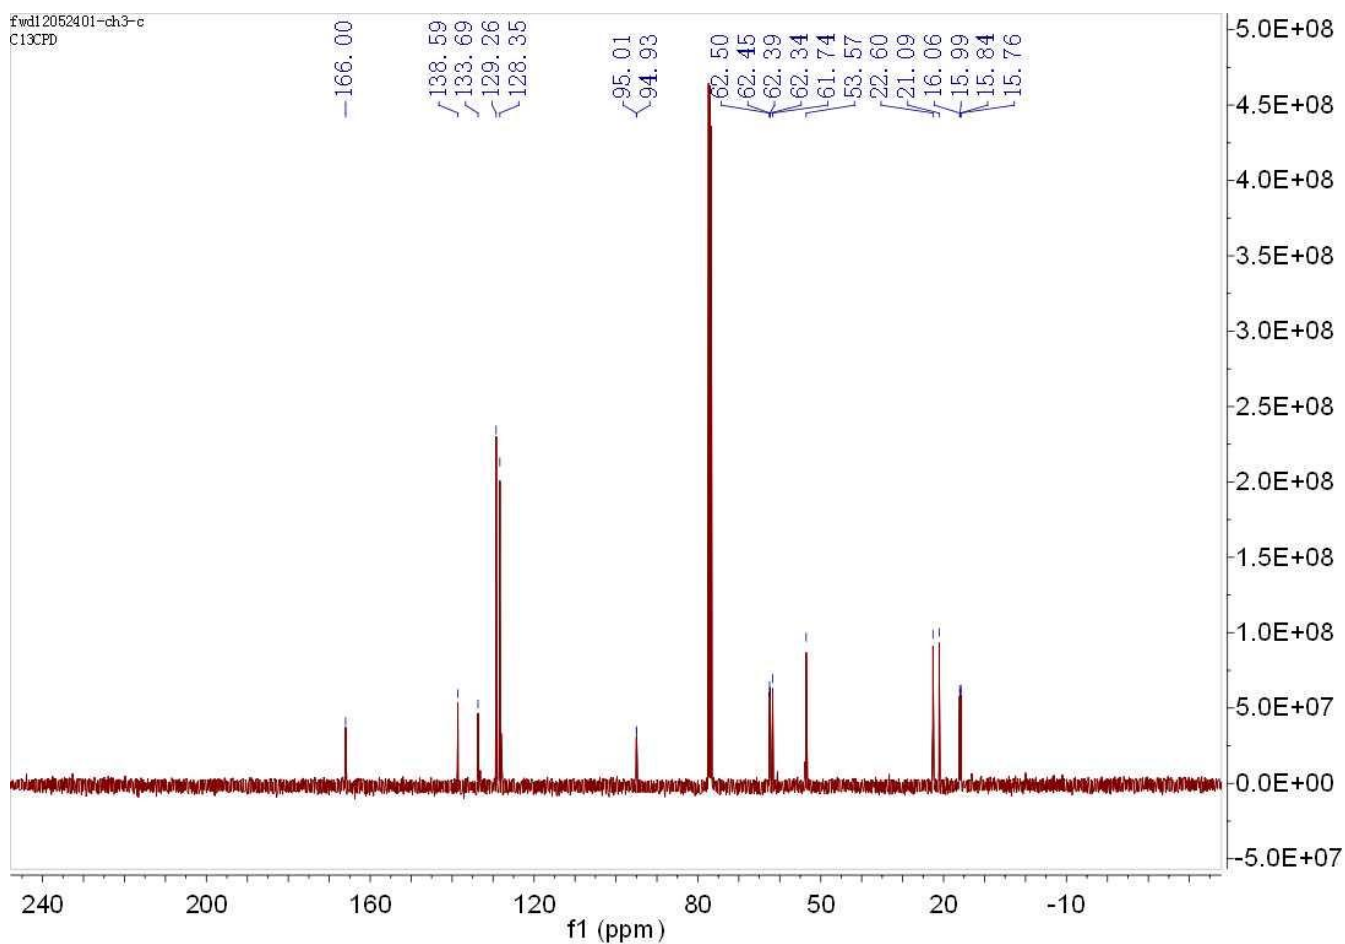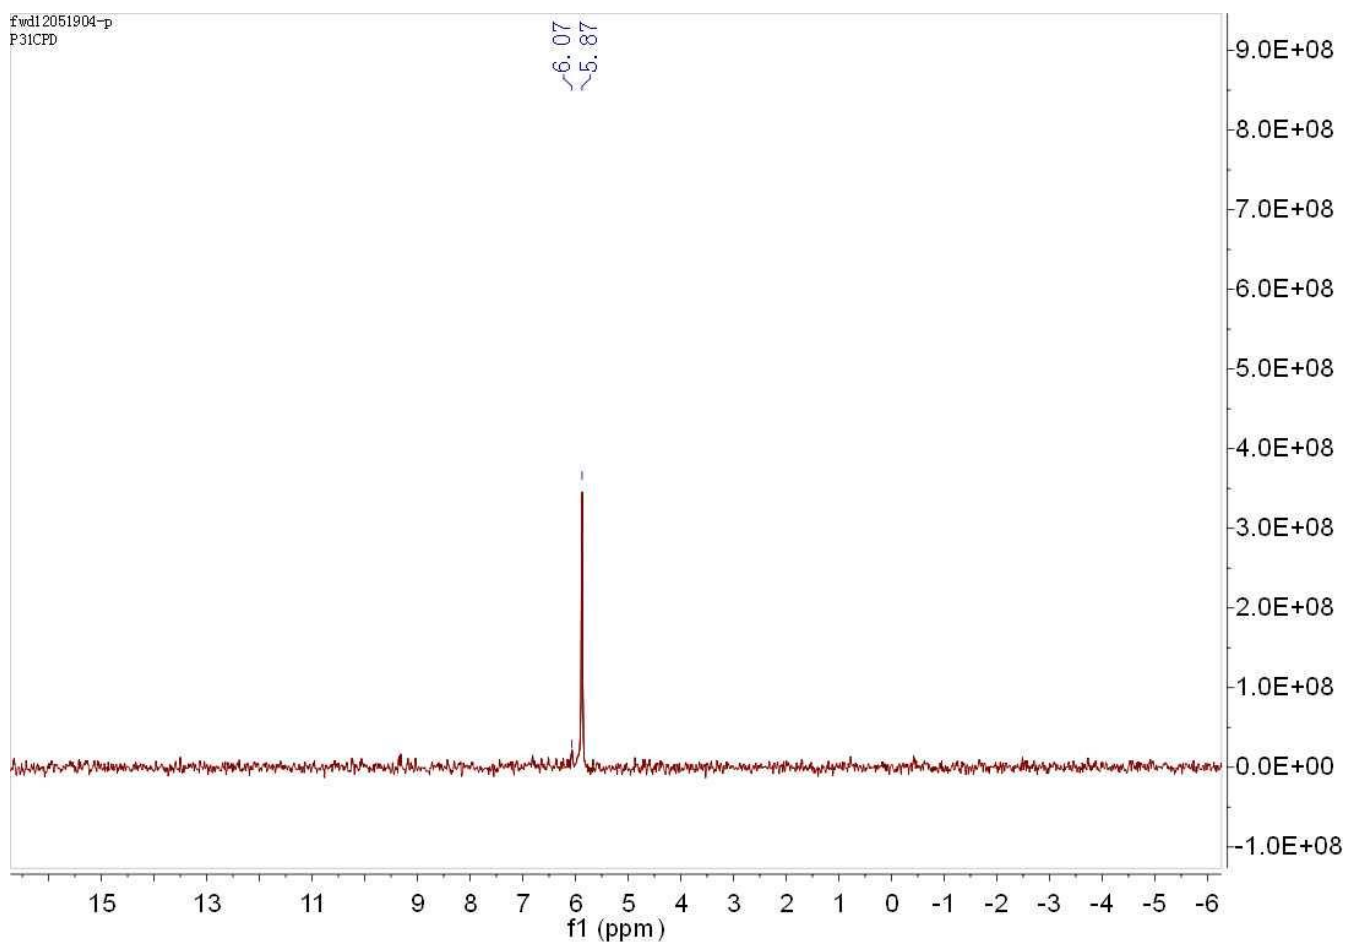

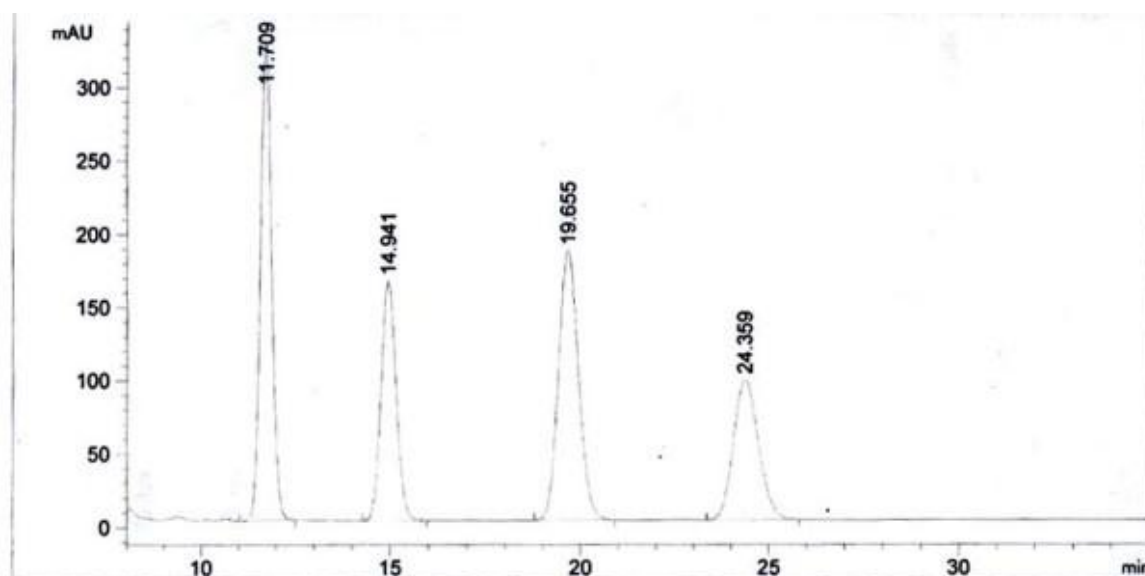

| # | [min]  |    | [min]  | mAU        | *s | [mAU ]    | %       |
|---|--------|----|--------|------------|----|-----------|---------|
| 1 | 11.709 | VB | 0.3240 | 6776.40967 |    | 324.16849 | 30.1468 |
| 2 | 14.941 | VB | 0.4234 | 4474.20410 |    | 163.84016 | 19.9048 |
| 3 | 19.655 | BB | 0.5707 | 6777.65186 |    | 184.12691 | 30.1523 |
| 4 | 24.359 | BB | 0.7223 | 4449.79639 |    | 95.56572  | 19.7962 |

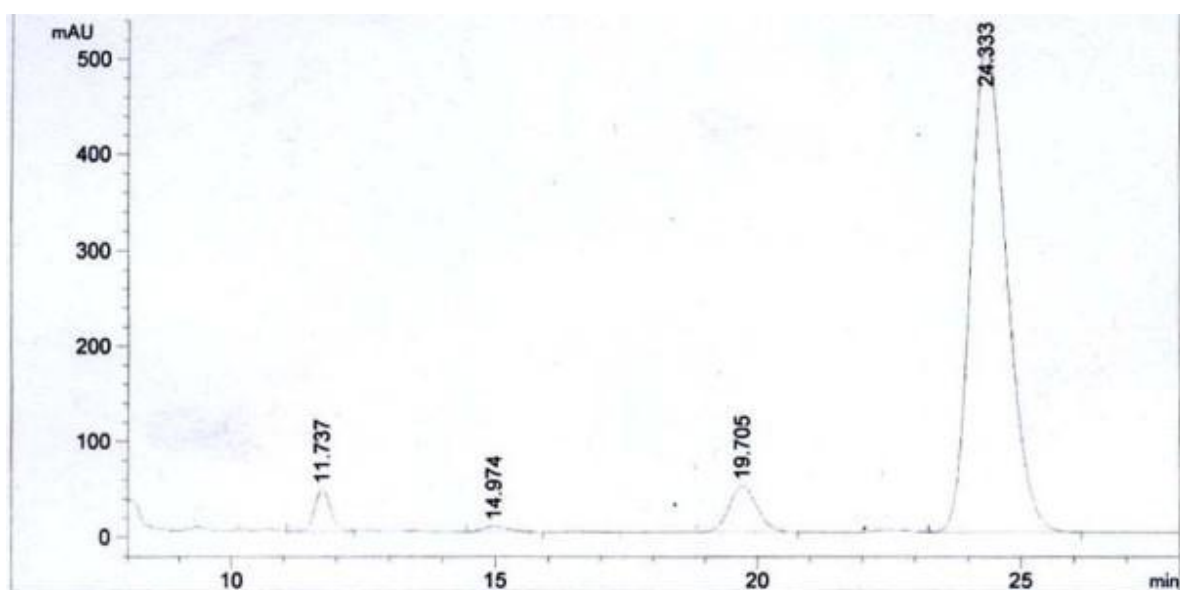

| # | [min]  |    | [min]  | mAU        | *s | [mAU. ]   | %       |
|---|--------|----|--------|------------|----|-----------|---------|
| 1 | 11.737 | VB | 0.3400 | 1000.22113 |    | 44.90058  | 3.6811  |
| 2 | 14.974 | VB | 0.4743 | 202.23769  |    | 6.38663   | 0.7443  |
| 3 | 19.705 | BB | 0.5742 | 1797.81714 |    | 48.60213  | 6.6165  |
| 4 | 24.333 | VB | 0.7341 | 2.41716e4  |    | 509.39432 | 88.9582 |

**Methyl 3-((diethoxyphosphoryl)amino)-2-methyl-2-nitro-3-(m-tolyl)propanoate (6k):**

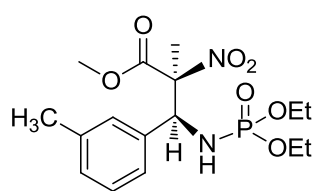

White solid; mp 102-105 °C;  $[\alpha]_D^{20} = 50.9^\circ$  ( $c = 0.005$ ,  $\text{CH}_2\text{Cl}_2$ );  $^1\text{H-NMR}$

(400 MHz,  $\text{CDCl}_3$ ):  $\delta$  7.24-7.29 (m, 2H), 7.12-7.17 (m, 2H), 4.84-4.92 (m, 1H), 4.75-4.83 (m, 1H), 3.74-3.96 (m, 6H), 3.54-3.63 (m, 1H), 2.34 (s, 3H),

1.69 (s, 3H), 1.20 (t,  $J = 7.0$  Hz, 3H), 1.03 (t,  $J = 7.0$  Hz, 3H);  $^{13}\text{C-NMR}$  (101 MHz,  $\text{CDCl}_3$ ):  $\delta$  164.96,

137.24, 135.64, 128.41, 128.23, 127.47, 124.38, 93.86 (d,  $J = 8.0$  Hz), 61.43 (d,  $J = 5.0$  Hz), 61.30 (d,  $J$

$= 5.1$  Hz), 60.96, 52.52, 21.63, 20.41, 14.98 (d,  $J = 7.6$  Hz), 14.74 (d,  $J = 7.6$  Hz);  $^{31}\text{P-NMR}$  (162 MHz,

$\text{CDCl}_3$ ):  $\delta$  5.71; HRMS (MALDI) calculated for  $[\text{C}_{16}\text{H}_{25}\text{N}_2\text{O}_7\text{P}+\text{Na}]^+$ : 411.1297, Found 411.1293;

HPLC (Chiralcel AD-H, hexane/*i*PrOH, 85:15 v/v, 1.0mL/min, 23°C, UV 220 nm): tr (minor) = 8.982

min, tr (major) = 11.691 min, tr (major) = 14.993 min, tr (major) = 16.418 min.

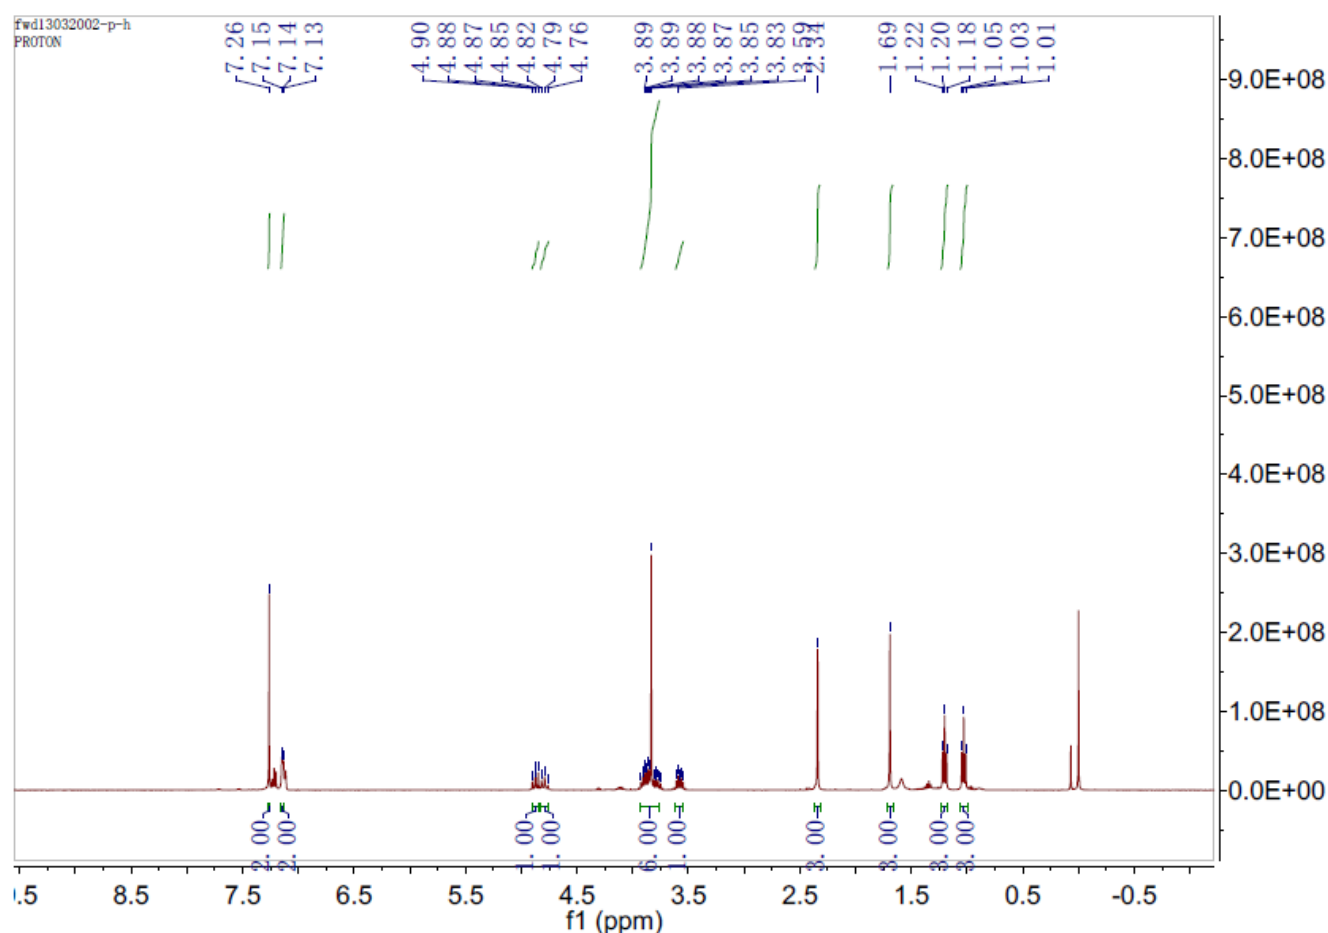

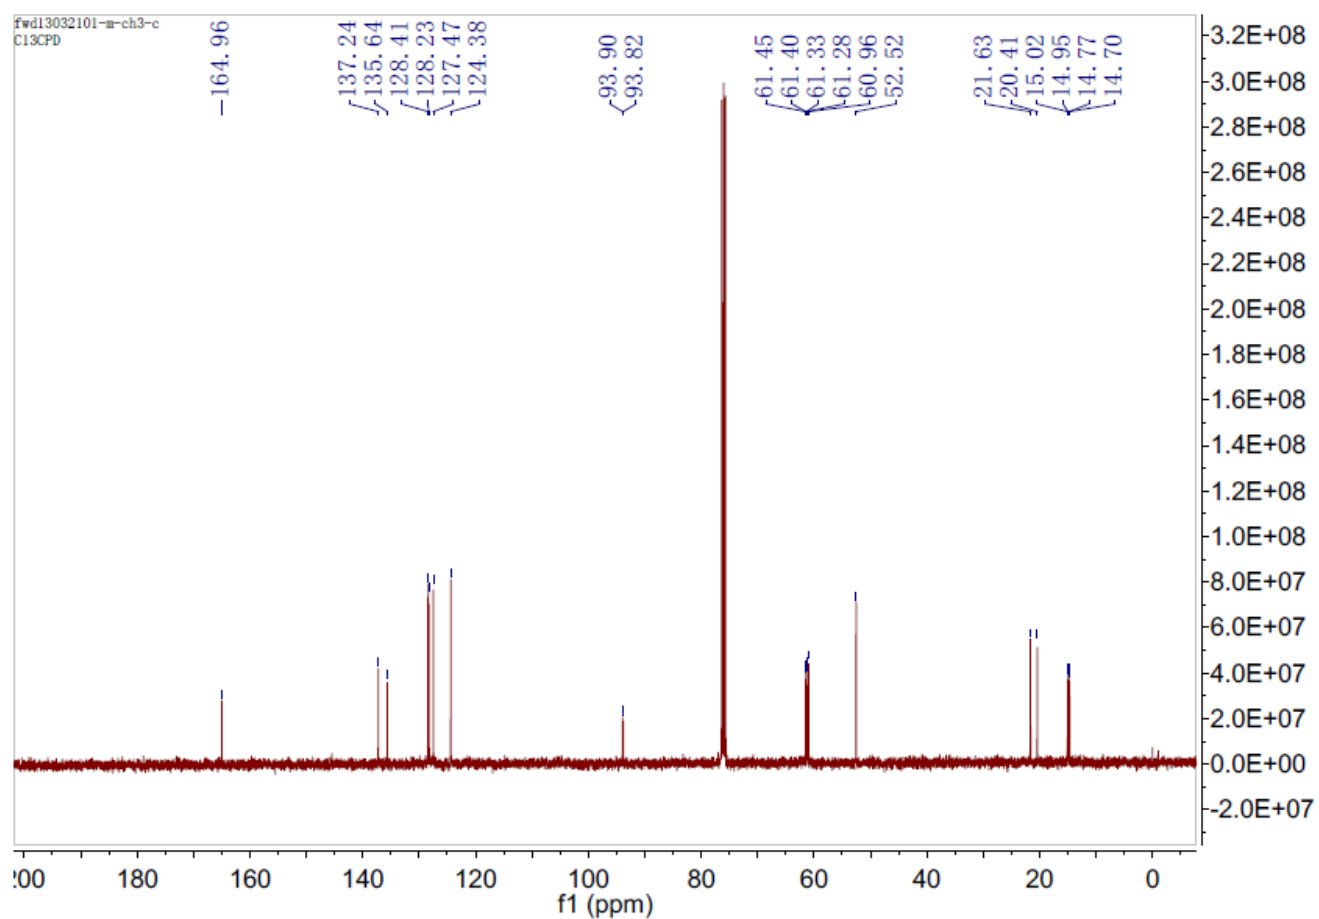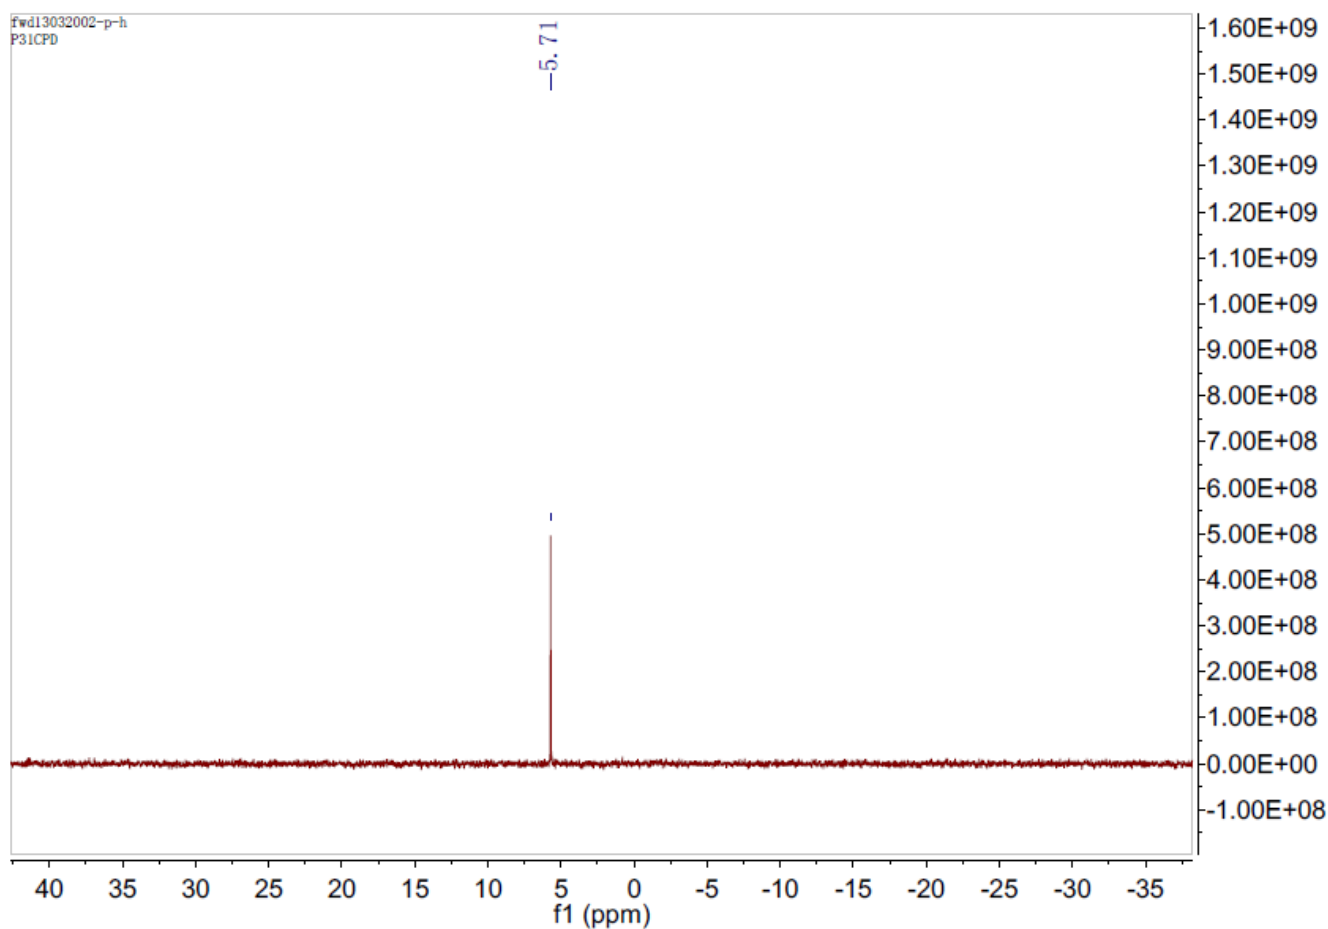

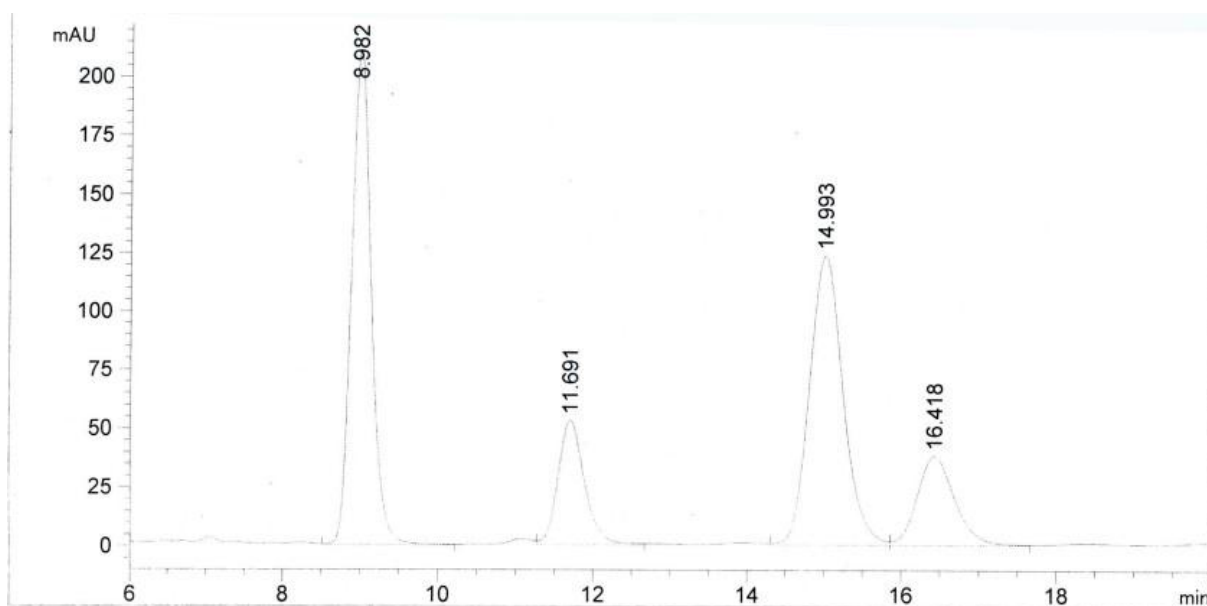

| # | [min]  |    | [min]  | mAU        | *s | [mAU ]    | %       |
|---|--------|----|--------|------------|----|-----------|---------|
| 1 | 8.982  | VB | 0.2709 | 3744.64185 |    | 211.25081 | 37.3204 |
| 2 | 11.691 | VB | 0.3662 | 1264.89343 |    | 52.91571  | 12.6064 |
| 3 | 14.993 | VV | 0.4646 | 3753.94092 |    | 123.73191 | 37.4130 |
| 4 | 16.418 | VV | 0.5120 | 1270.30371 |    | 38.02853  | 12.6603 |

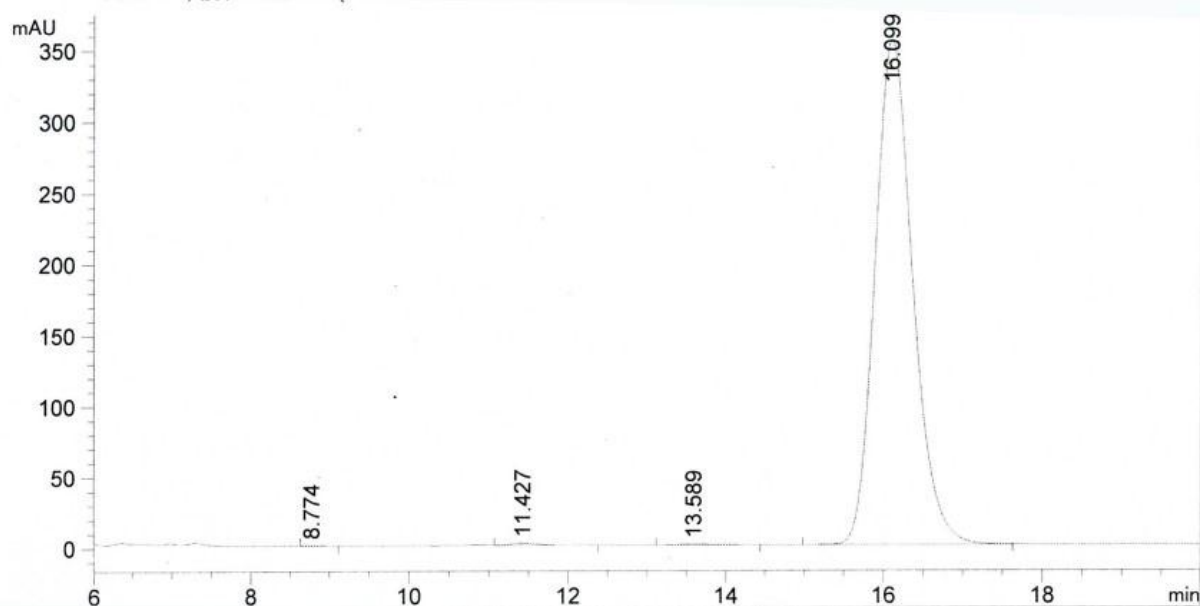

| # | [min]  |    | [min]  | mAU       | *s | [mAU ]     | %       |
|---|--------|----|--------|-----------|----|------------|---------|
| 1 | 8.774  | BB | 0.2647 | 7.31082   |    | 3.55415e-1 | 0.0618  |
| 2 | 11.427 | VB | 0.3687 | 37.00798  |    | 1.50350    | 0.3127  |
| 3 | 13.589 | VB | 0.4432 | 16.59977  |    | 5.01151e-1 | 0.1403  |
| 4 | 16.099 | BB | 0.5099 | 1.17742e4 |    | 355.71262  | 99.4853 |

**Methyl 3-((diethylphosphoryl)amino)-3-(furan-2-yl)-2-methyl-2-nitropropanoate (6l):**

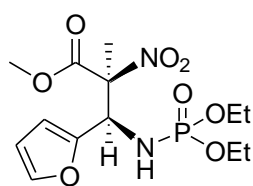

White solid; mp 84-87 °C;  $[\alpha]_D^{20} = 74.0^\circ$  ( $c = 0.005$ ,  $\text{CH}_2\text{Cl}_2$ );  $^1\text{H}$  NMR (300

MHz,  $\text{CDCl}_3$ )  $\delta$  7.34-7.37 (m, 1H), 6.28-6.46 (m, 2H), 5.11 (dd,  $J = 11.8, 9.9$  Hz,

1H), 4.34 (t,  $J = 11.8$  Hz, 1H), 3.70-4.02 (m, 7H), 1.76 (s, 3H), 1.11-1.29 (m,

6H);  $^{13}\text{C}$  NMR (101 MHz,  $\text{CDCl}_3$ )  $\delta$  165.71, 150.11, 142.65, 110.79, 109.77, 94.05 (d,  $J = 7.8$  Hz),

62.66, 62.62, 55.51, 53.70, 21.40, 16.07, 15.96 (d,  $J = 7.5$  Hz);  $^{31}\text{P}$  NMR (162 MHz,  $\text{CDCl}_3$ )  $\delta$  5.98;

HRMS (MALDI) calculated for  $[\text{C}_{13}\text{H}_{21}\text{N}_2\text{O}_8\text{P}+\text{Na}]^+$ : 387.0933, Found: 387.0935; HPLC (Chiralcel

AS-H, hexane/*i*PrOH, 85:15 v/v, 1.0mL/min, 23°C, UV 220 nm): tr (minor) = 22.310 min.

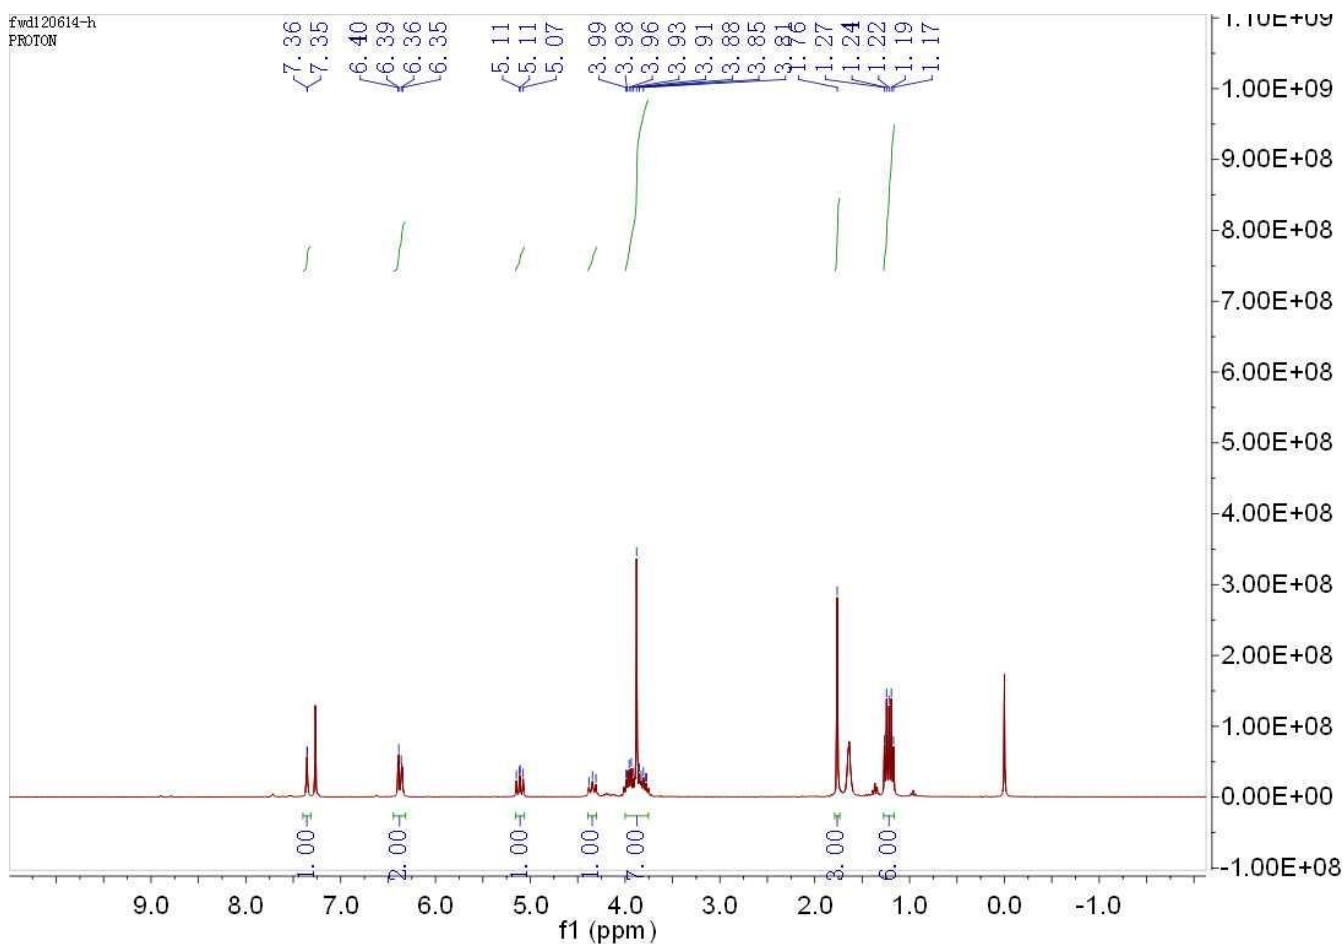

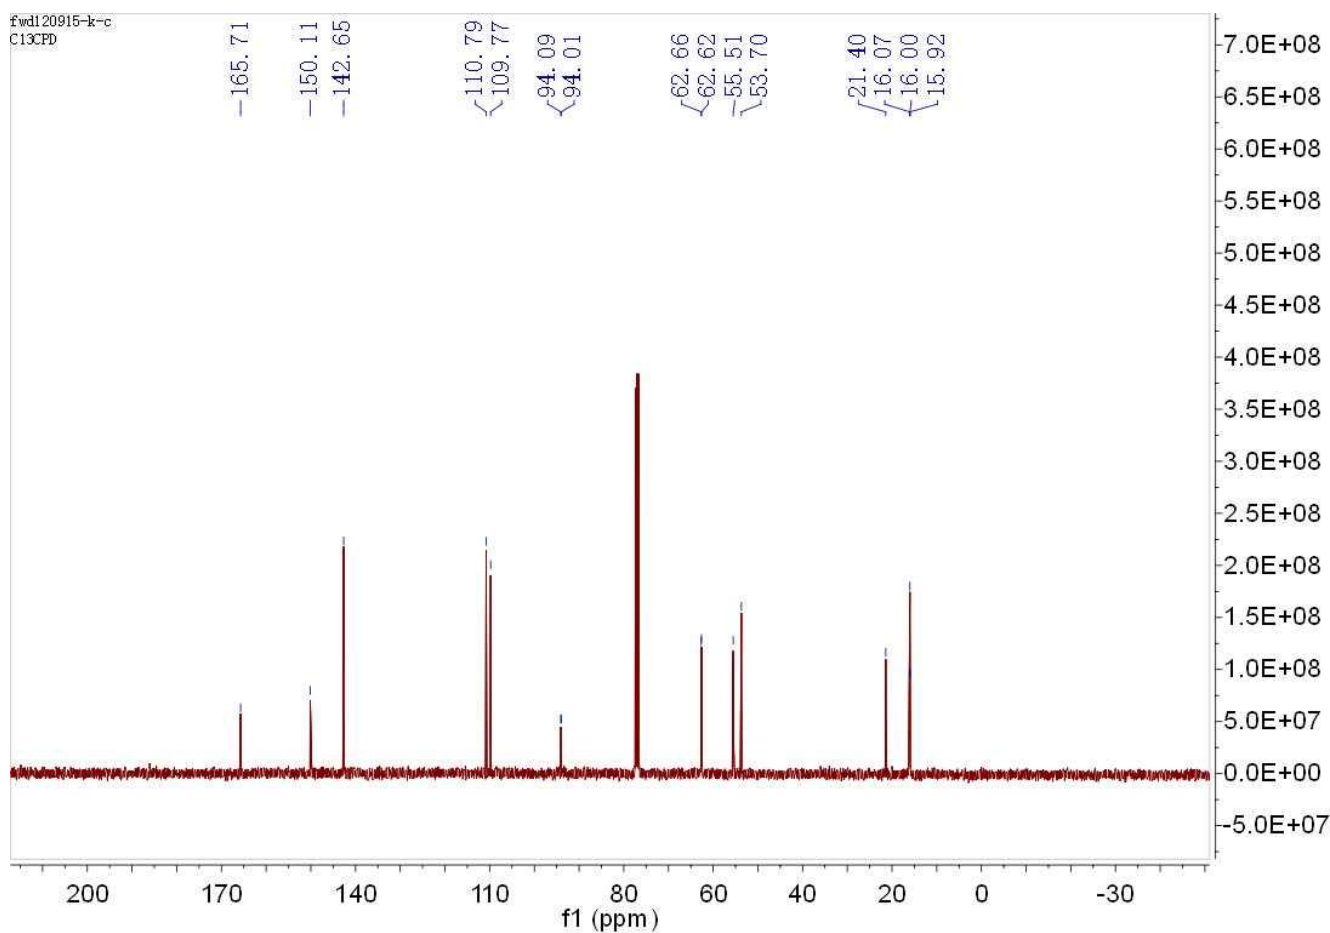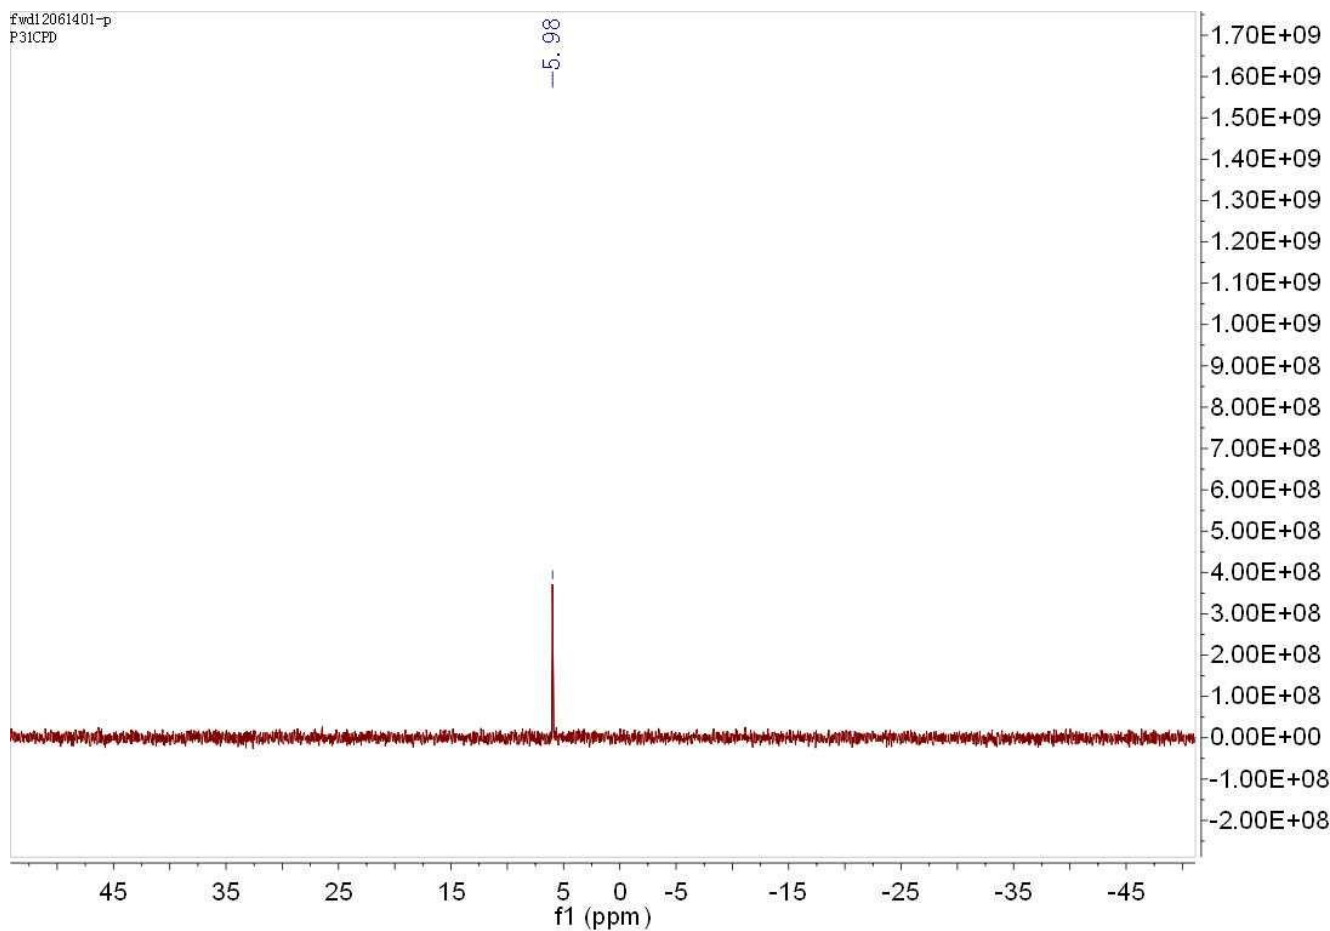

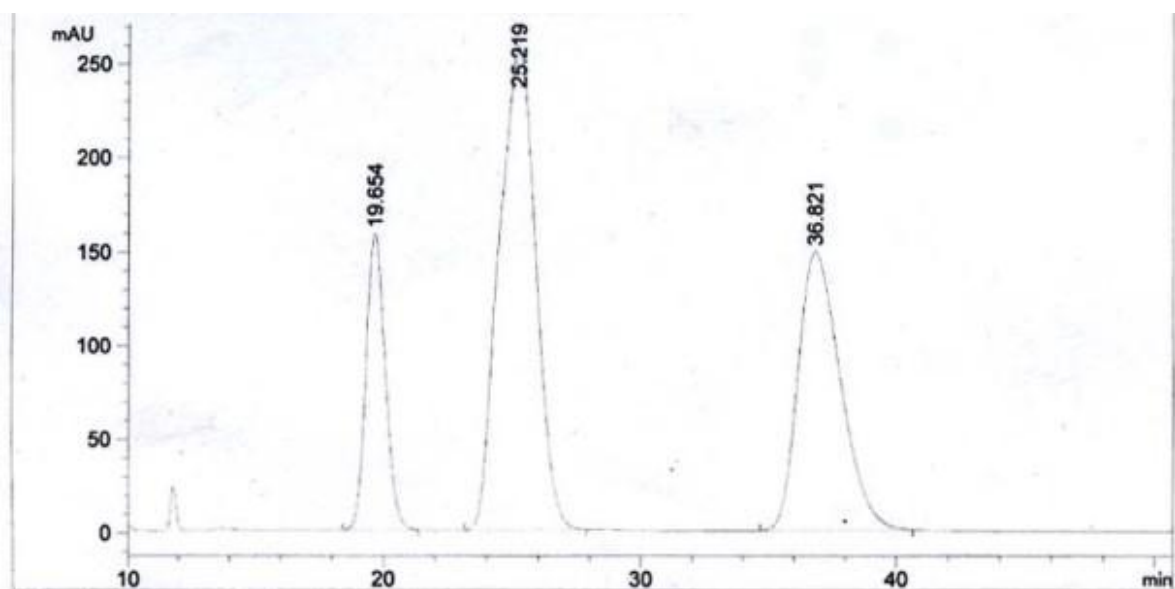

| # | [min]  |    | [min]  | mAU        | *s | [mAU]     | %       |
|---|--------|----|--------|------------|----|-----------|---------|
| 1 | 19.654 | BB | 0.8077 | 8231.20117 |    | 158.27026 | 16.1271 |
| 2 | 25.219 | BB | 1.4541 | 2.55519e4  |    | 257.62704 | 50.0629 |
| 3 | 36.821 | BB | 1.7540 | 1.72565e4  |    | 149.37294 | 33.8100 |

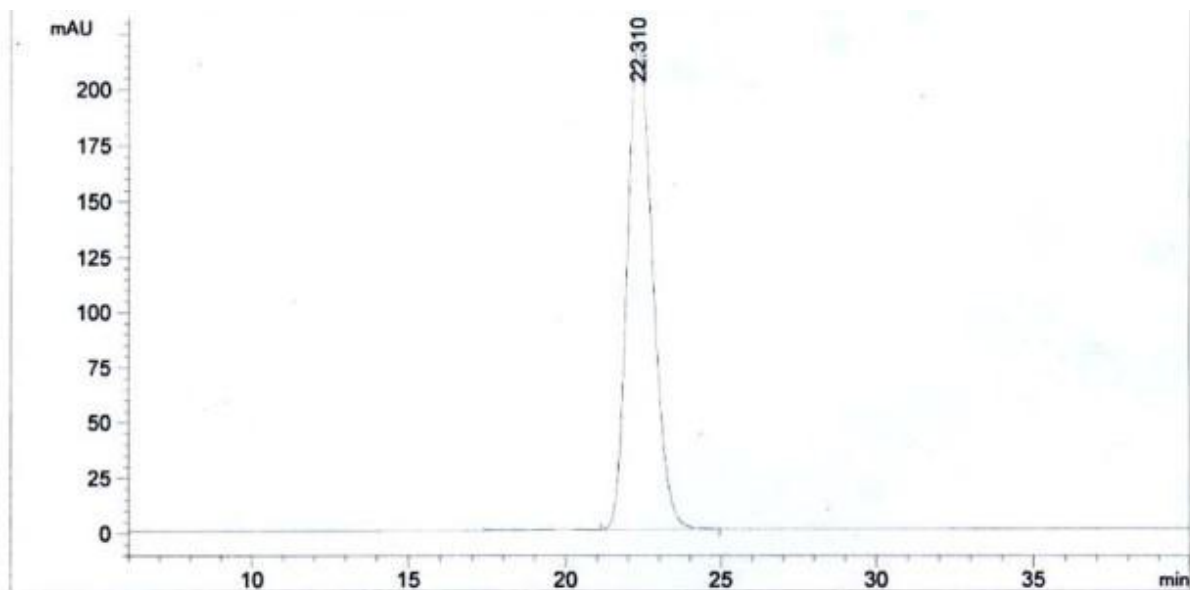

| # | [min]  |    | [min]  | mAU       | *s | [mAU]     | %        |
|---|--------|----|--------|-----------|----|-----------|----------|
| 1 | 22.310 | BB | 0.8902 | 1.25131e4 |    | 220.15718 | 100.0000 |

**Methyl 3-((diethylphosphoryl)amino)-2-methyl-2-nitro-5-phenylpent-4-enoate (6m):**

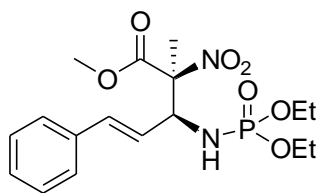

White solid; mp 57-60 °C;  $[\alpha]_D^{20} = 6.4^\circ$  ( $c = 0.005$ ,  $\text{CH}_2\text{Cl}_2$ );  $^1\text{H}$  NMR (400 MHz,  $\text{CDCl}_3$ )  $\delta$  7.30-7.47 (m, 5H), 6.71 (d,  $J = 15.8$  Hz, 1H), 6.17 (dd,  $J = 15.8, 8.5$  Hz, 1H), 4.44 (dd,  $J = 20.4, 9.0$  Hz, 1H), 3.81-4.11 (m, 8H), 1.89 (s, 3H), 1.22-1.33 (m, 6H);  $^{13}\text{C}$  NMR (101 MHz,  $\text{CDCl}_3$ )  $\delta$  166.28, 135.71, 135.57, 128.73, 128.50, 126.70, 124.43, 95.05 (d,  $J = 7.3$  Hz), 62.76, 62.69 (d,  $J = 4.7$  Hz), 60.82, 53.61, 21.66, 16.17, 16.07 (d,  $J = 7.3$  Hz);  $^{31}\text{P}$  NMR (162 MHz,  $\text{CDCl}_3$ )  $\delta$  6.73; HRMS (MALDI) calculated for  $[\text{C}_{17}\text{H}_{25}\text{N}_2\text{O}_7\text{P} + \text{Na}]^+$ : 423.1297, Found: 423.1295; HPLC (Chiralcel AD-H, hexane/*i*PrOH, 85:15 v/v, 1.0mL/min, 23°C, UV 220 nm): tr (major) = 12.620 min, tr (major) = 24.532 min.

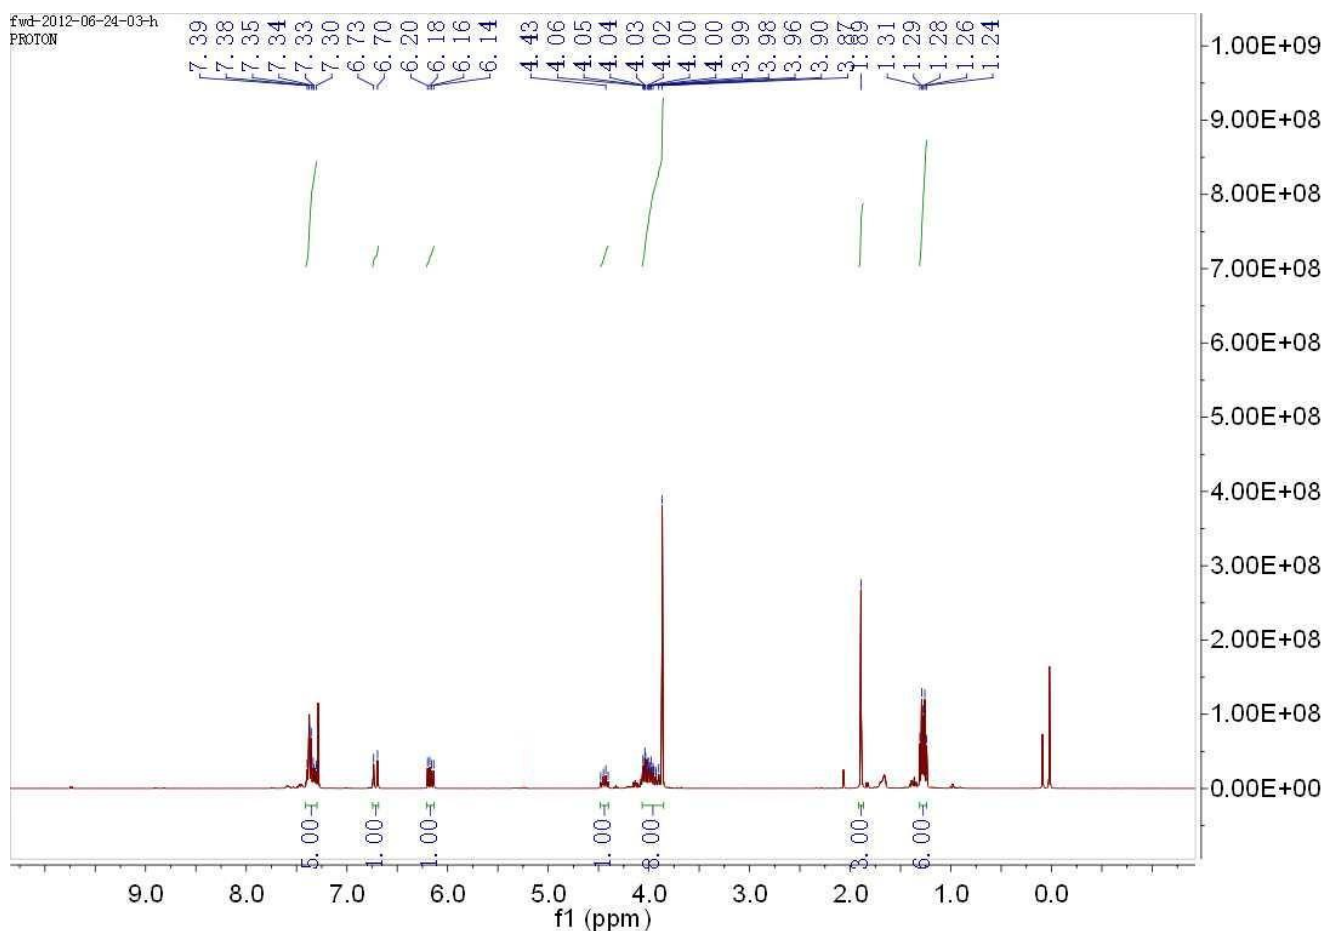

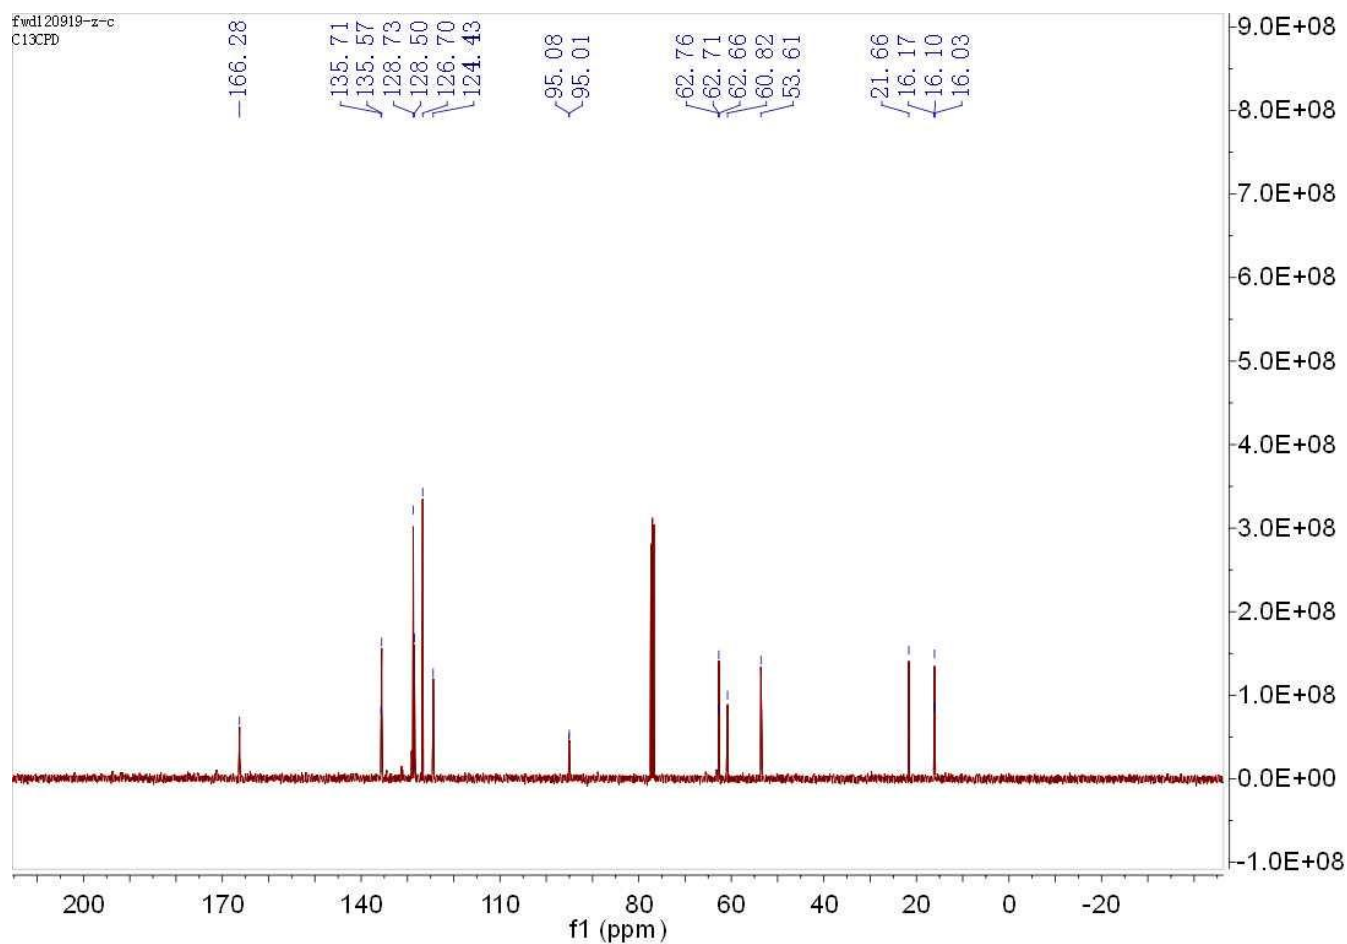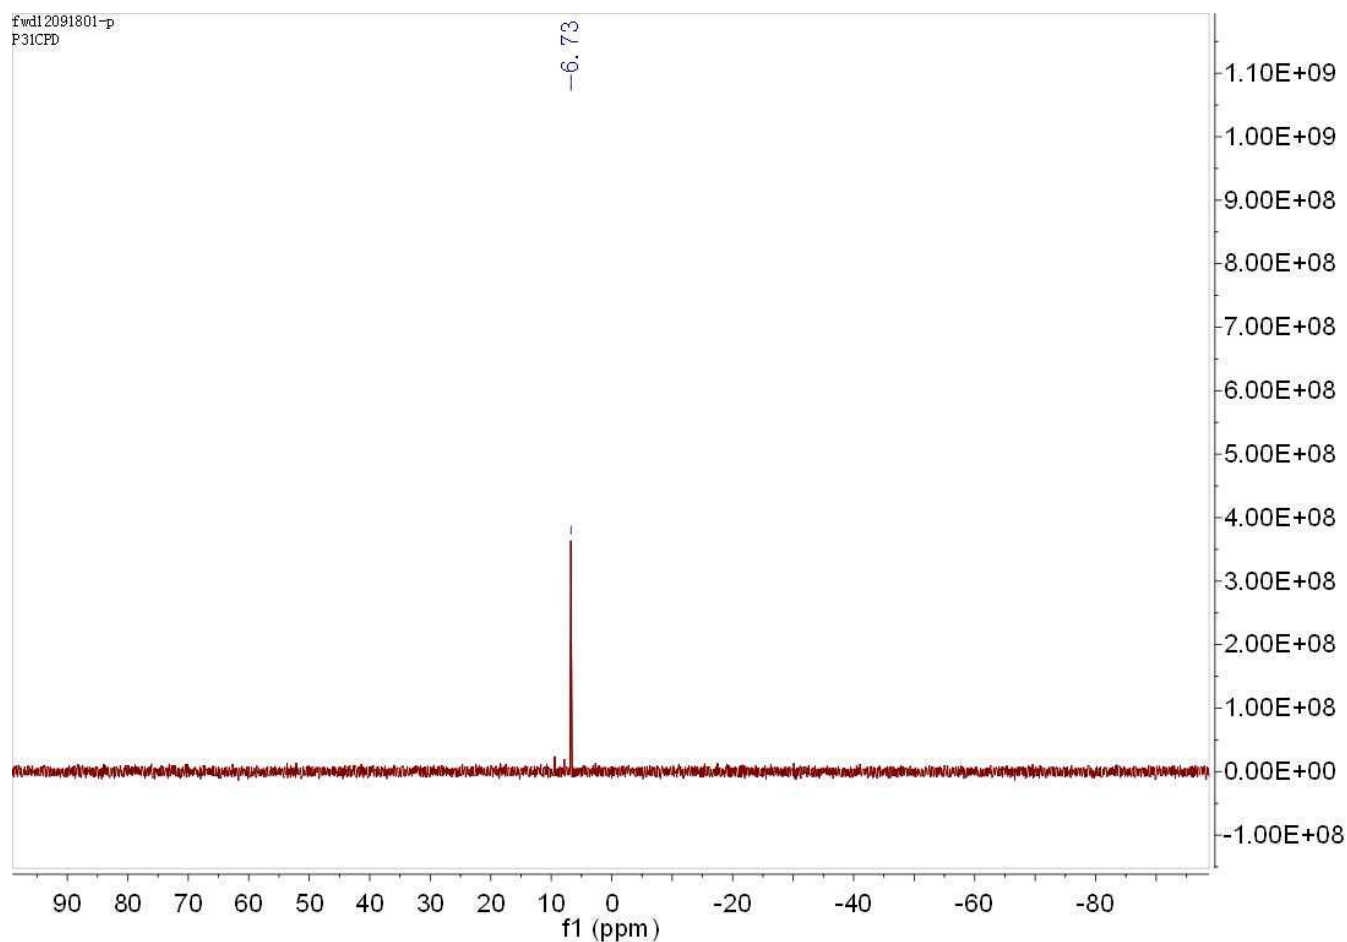

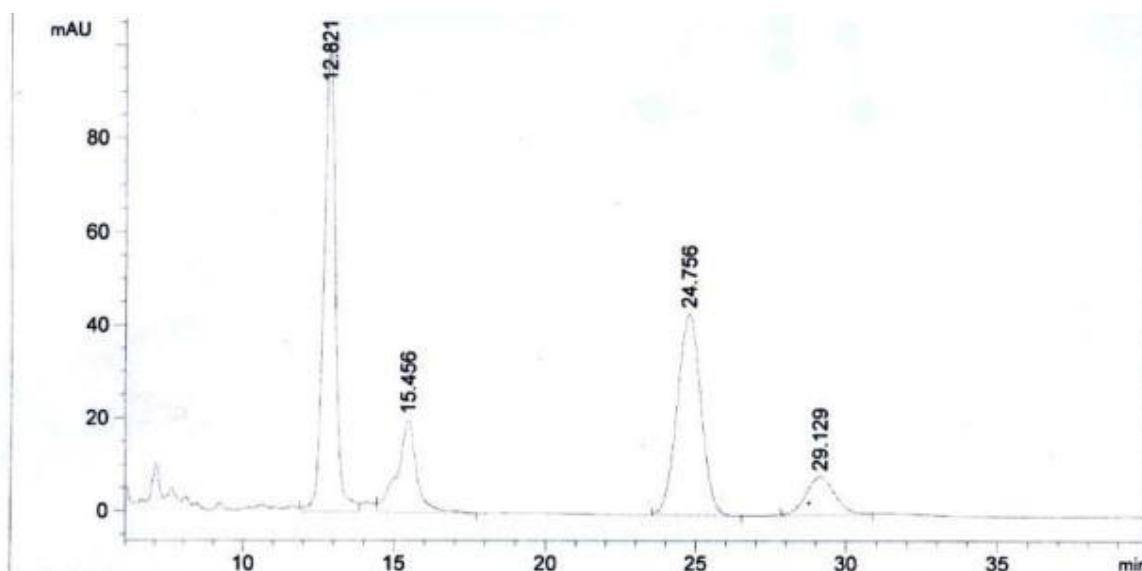

| # | [min]  |    | [min]  | mAU        | *s | [mAU]     | %       |
|---|--------|----|--------|------------|----|-----------|---------|
| 1 | 12.821 | VV | 0.4134 | 2712.45605 |    | 100.66216 | 41.3371 |
| 2 | 15.456 | VB | 0.6313 | 891.24524  |    | 19.97224  | 13.5823 |
| 3 | 24.756 | BB | 0.8536 | 2402.01685 |    | 43.51958  | 36.6061 |
| 4 | 29.129 | BB | 1.0297 | 556.08356  |    | 8.32577   | 8.4746  |

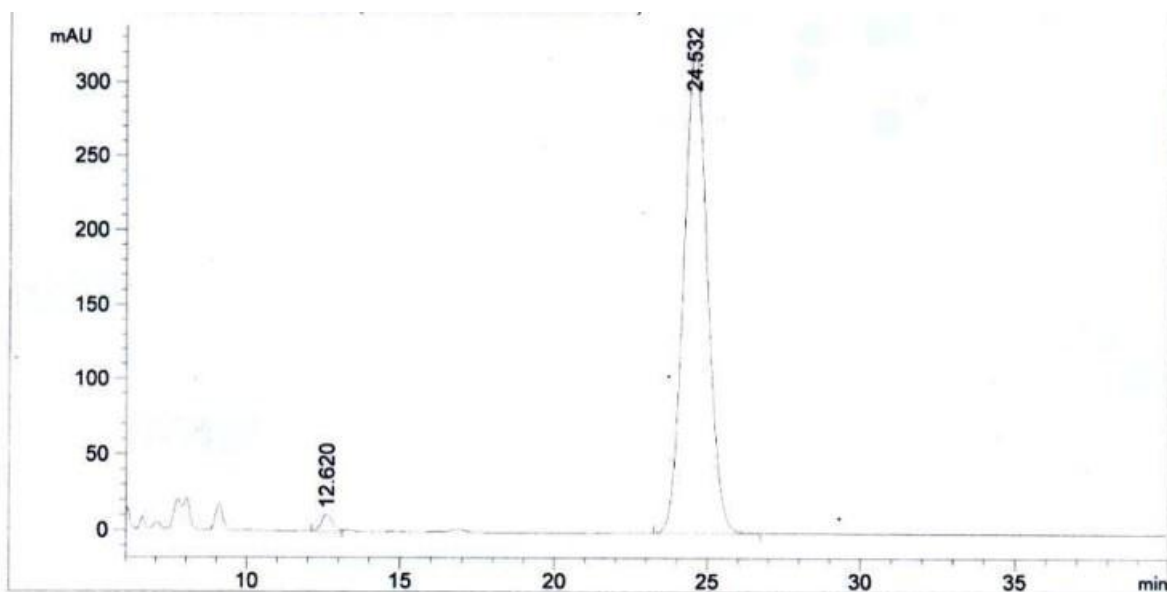

| # | [min]  |    | [min]  | mAU       | *s | [mAU]     | %       |
|---|--------|----|--------|-----------|----|-----------|---------|
| 1 | 12.620 | VV | 0.4011 | 318.33316 |    | 12.06316  | 1.7938  |
| 2 | 24.532 | BB | 0.8328 | 1.74277e4 |    | 323.25488 | 98.2062 |

**Methyl 2-((2-chlorophenyl)((diethylphosphoryl)amino)methyl)-2-nitrobutanoate (6n):**

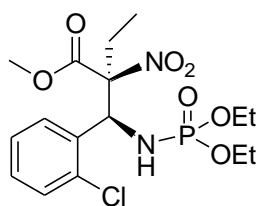

White solid; mp 59-62 °C;  $[\alpha]_D^{20} = 7.0^\circ$  ( $c = 0.01$ ,  $\text{CH}_2\text{Cl}_2$ );  $^1\text{H}$  NMR (400 MHz,  $\text{CDCl}_3$ )  $\delta$  7.36-7.41 (m, 1H), 7.23-7.31 (m, 2H), 7.12-7.18 (m, 1H), 5.57-5.75 (m, 1H), 4.65-4.85 (m, 1H), 3.77-4.03 (m, 6H), 3.43-3.62 (m, 1H), 2.16-2.30 (m, 1H), 1.82-1.99 (m, 1H), 1.25 (t,  $J = 7.0$  Hz, 3H), 1.01 (t,  $J = 7.0$  Hz, 3H), 0.95 (t,  $J = 7.3$  Hz, 3H);  $^{13}\text{C}$  NMR (101 MHz,  $\text{CDCl}_3$ )  $\delta$  165.62, 135.10, 134.06, 129.92, 129.65, 127.94, 127.63, 100.74 (d,  $J = 8.4$  Hz), 62.70 (d,  $J = 5.5$  Hz), 62.40 (d,  $J = 5.5$  Hz), 55.59, 53.57, 27.09, 16.09 (d,  $J = 7.5$  Hz), 15.75 (d,  $J = 7.5$  Hz), 9.12;  $^{31}\text{P}$  NMR (162 MHz,  $\text{CDCl}_3$ )  $\delta$  5.34, 5.19; HRMS (MALDI) calculated for  $[\text{C}_{16}\text{H}_{24}\text{ClN}_2\text{O}_7\text{P}+\text{Na}]^+$ : 445.0907, Found 445.0905; HPLC (Chiralcel AD-H, hexane/*i*PrOH, 85:15 v/v, 1.0mL/min, 23°C, UV 220 nm): tr (minor) = 8.184 min, tr (major) = 10.391 min, tr (major) = 11.817 min, tr (major) = 17.838 min.

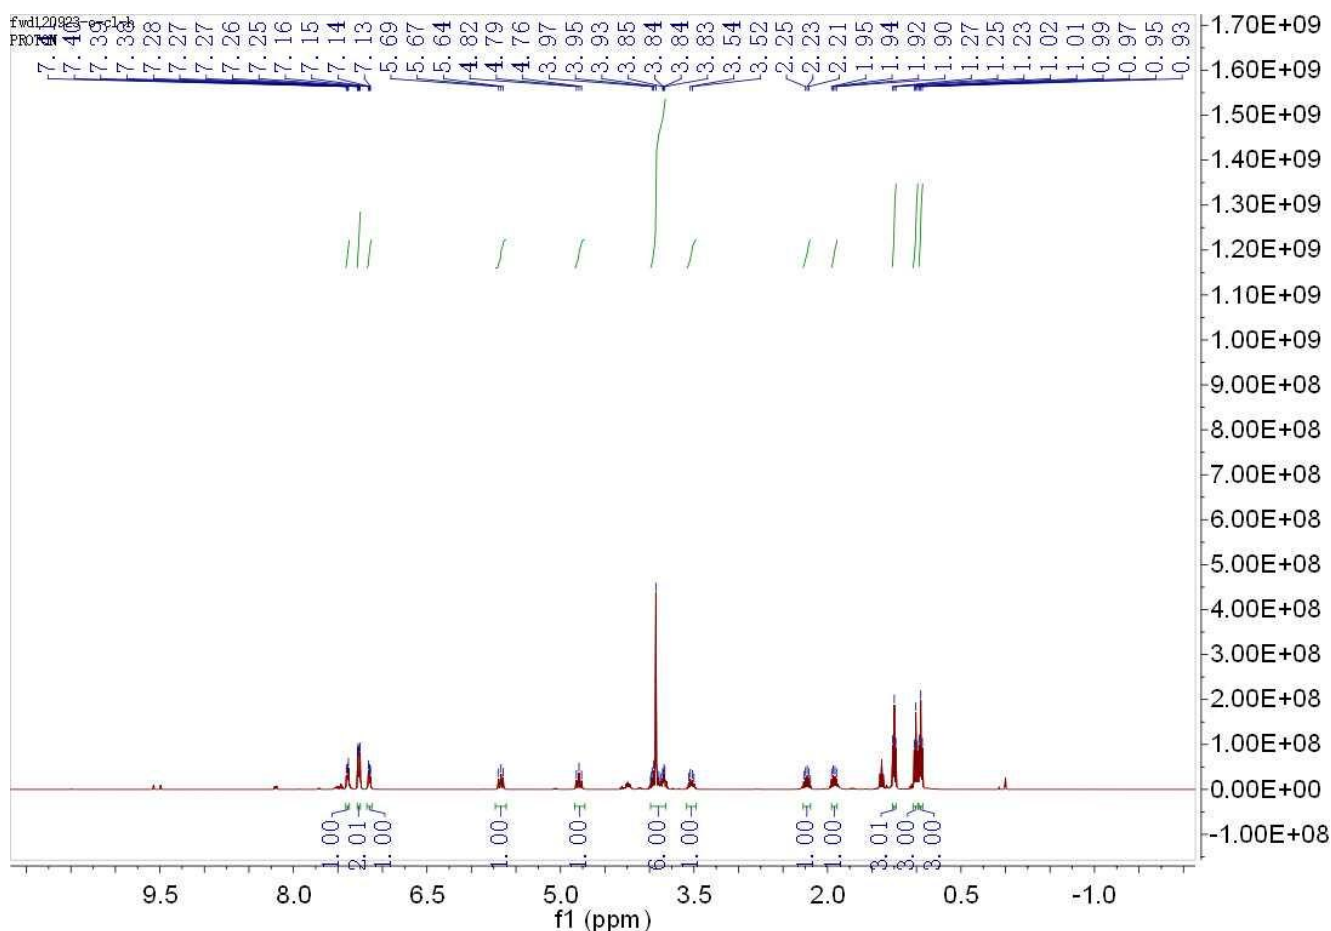

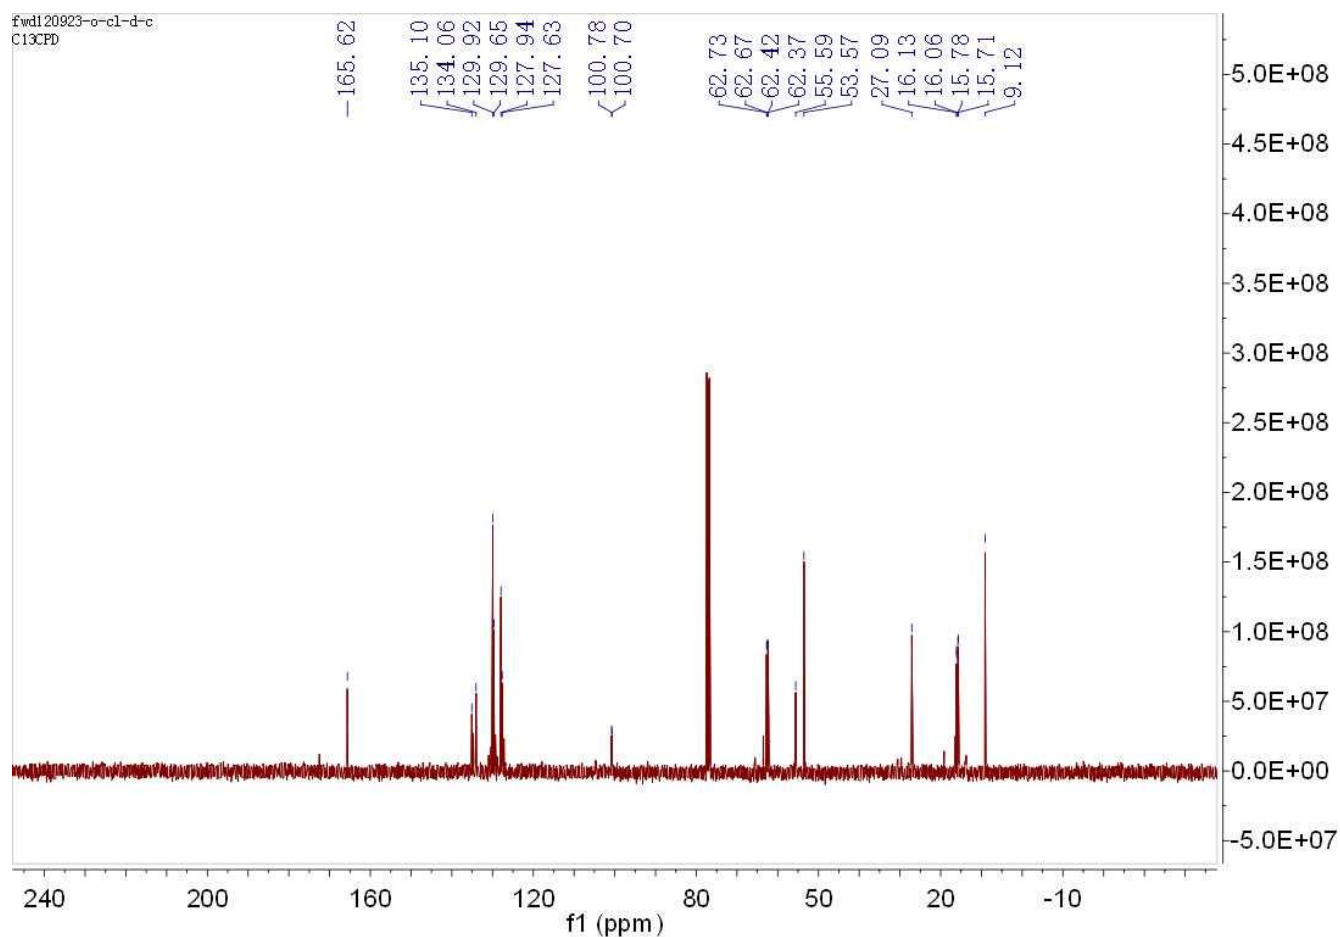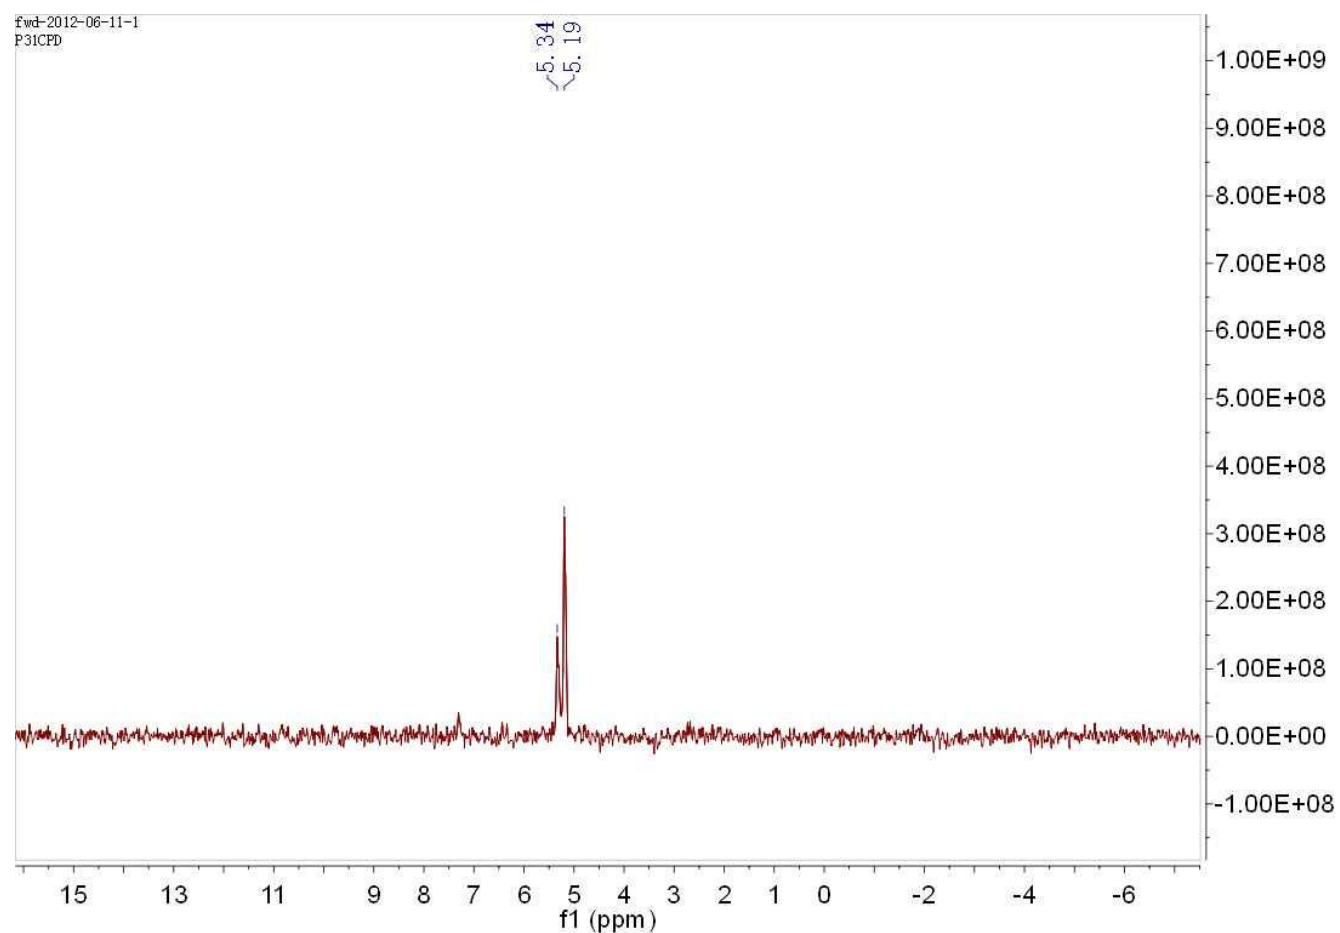

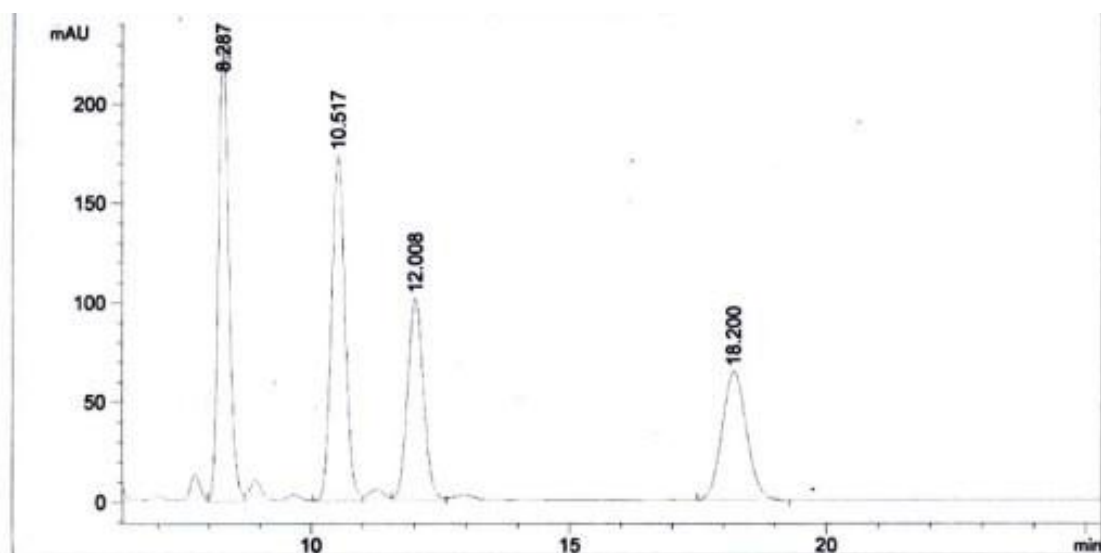

| # | [min]  |    | [min]  | mAU        | *s | [mAU ]    | %       |
|---|--------|----|--------|------------|----|-----------|---------|
| 1 | 8.287  | VV | 0.2216 | 3299.70435 |    | 229.57248 | 30.6022 |
| 2 | 10.517 | VV | 0.2839 | 3181.72681 |    | 173.45546 | 29.5080 |
| 3 | 12.008 | VV | 0.3322 | 2180.84033 |    | 101.50092 | 20.2256 |
| 4 | 18.200 | BB | 0.5141 | 2120.31421 |    | 64.09477  | 19.6642 |

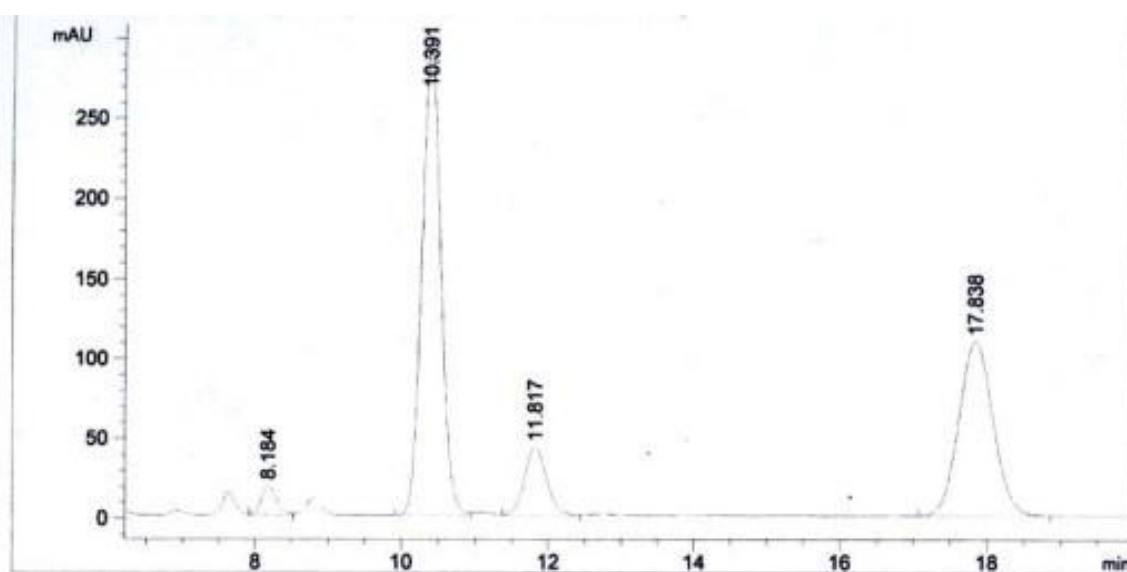

| # | [min]  |    | [min]  | mAU        | *s | [mAU ]    | %       |
|---|--------|----|--------|------------|----|-----------|---------|
| 1 | 8.184  | VV | 0.2166 | 261.67789  |    | 18.43349  | 2.6288  |
| 2 | 10.391 | BV | 0.2797 | 5258.64355 |    | 292.45578 | 52.8277 |
| 3 | 11.817 | VB | 0.3262 | 905.06299  |    | 42.89463  | 9.0922  |
| 4 | 17.838 | BB | 0.4991 | 3528.94531 |    | 109.69804 | 35.4514 |

**Methyl 2-((3-chlorophenyl)((diethylphosphoryl)amino)methyl)-2-nitrobutanoate (6o):**

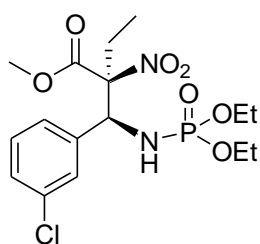

White solid; mp 58-60 °C;  $[\alpha]_D^{20} = 27.6^\circ$  ( $c = 0.005$ ,  $\text{CH}_2\text{Cl}_2$ );  $^1\text{H}$  NMR (400 MHz,  $\text{CDCl}_3$ )  $\delta$  7.22-7.35 (m, 3H), 7.13-7.20 (m, 1H), 4.93-5.03 (m, 1H), 4.67-4.78 (m, 1H), 3.79-3.97 (m, 6H), 3.63-3.74 (m, 1H), 1.95-2.09 (m, 2H), 1.22 (t,  $J = 7.0$  Hz, 3H), 1.08 (t,  $J = 7.3$  Hz, 3H), 0.96 (t,  $J = 7.3$  Hz, 3H);  $^{13}\text{C}$  NMR (101 MHz,  $\text{CDCl}_3$ )  $\delta$  165.64, 139.07, 134.58, 129.90, 128.96, 128.18, 126.21, 98.34, 62.60 (d,  $J = 5.3$  Hz), 62.50 (d,  $J = 5.1$  Hz), 60.98, 53.49, 29.59, 15.99 (d,  $J = 7.5$  Hz), 15.81 (d,  $J = 7.5$  Hz), 9.02;  $^{31}\text{P}$  NMR (162 MHz,  $\text{CDCl}_3$ )  $\delta$  5.75, 5.60; HRMS (MALDI) calculated for  $[\text{C}_{16}\text{H}_{24}\text{ClN}_2\text{O}_7\text{P} + \text{H}]^+$ : 423.1088, Found: 423.1086; HPLC (Chiralcel AD-H, hexane/*i*PrOH, 85:15 v/v, 1.0 mL/min, 23°C, UV 220 nm): tr (minor) = 8.483 min, tr (major) = 10.905 min, tr (major) = 17.385 min, tr (major) = 18.813 min.

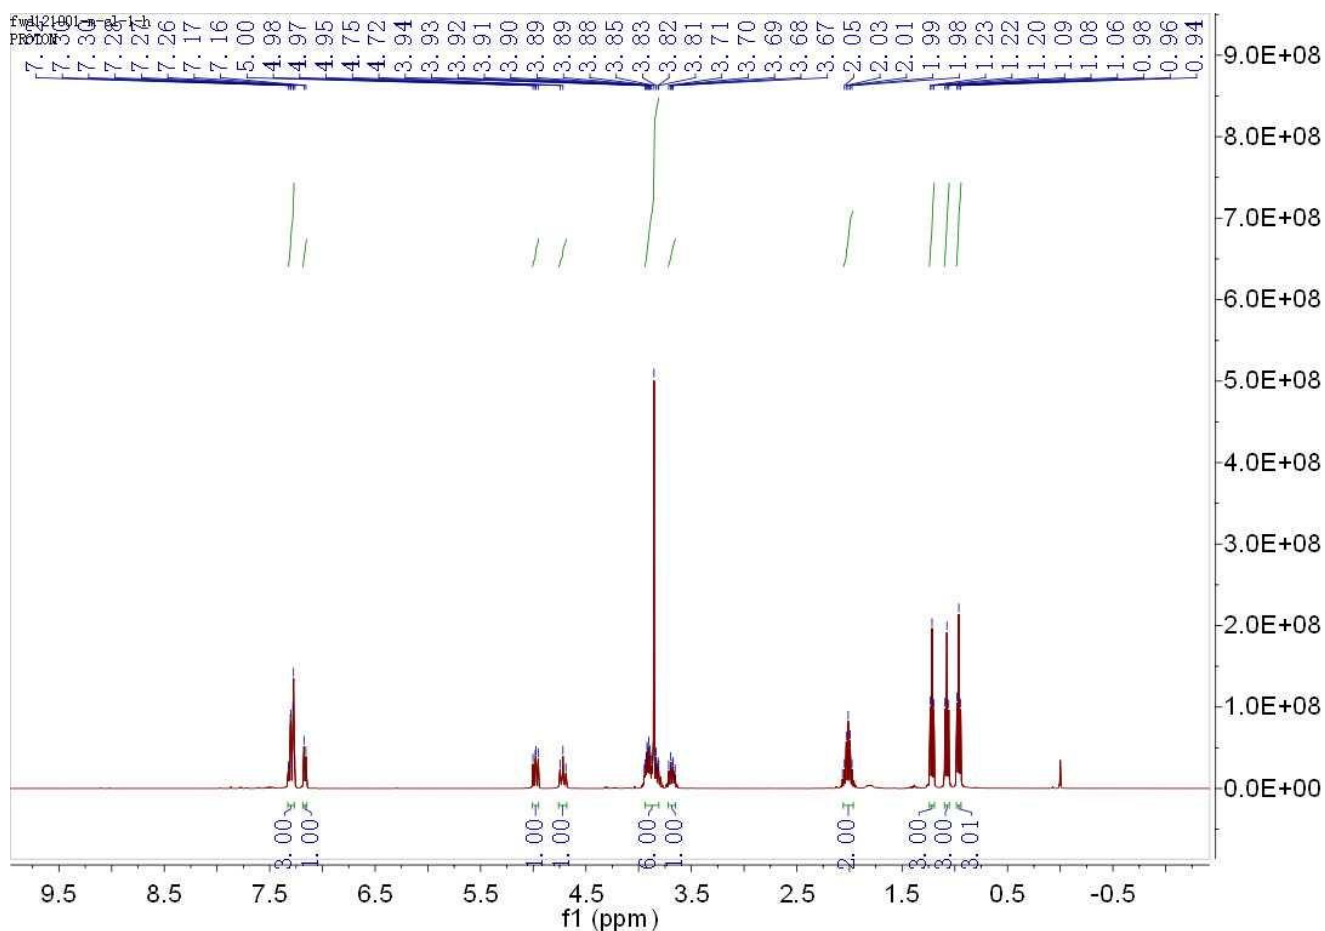

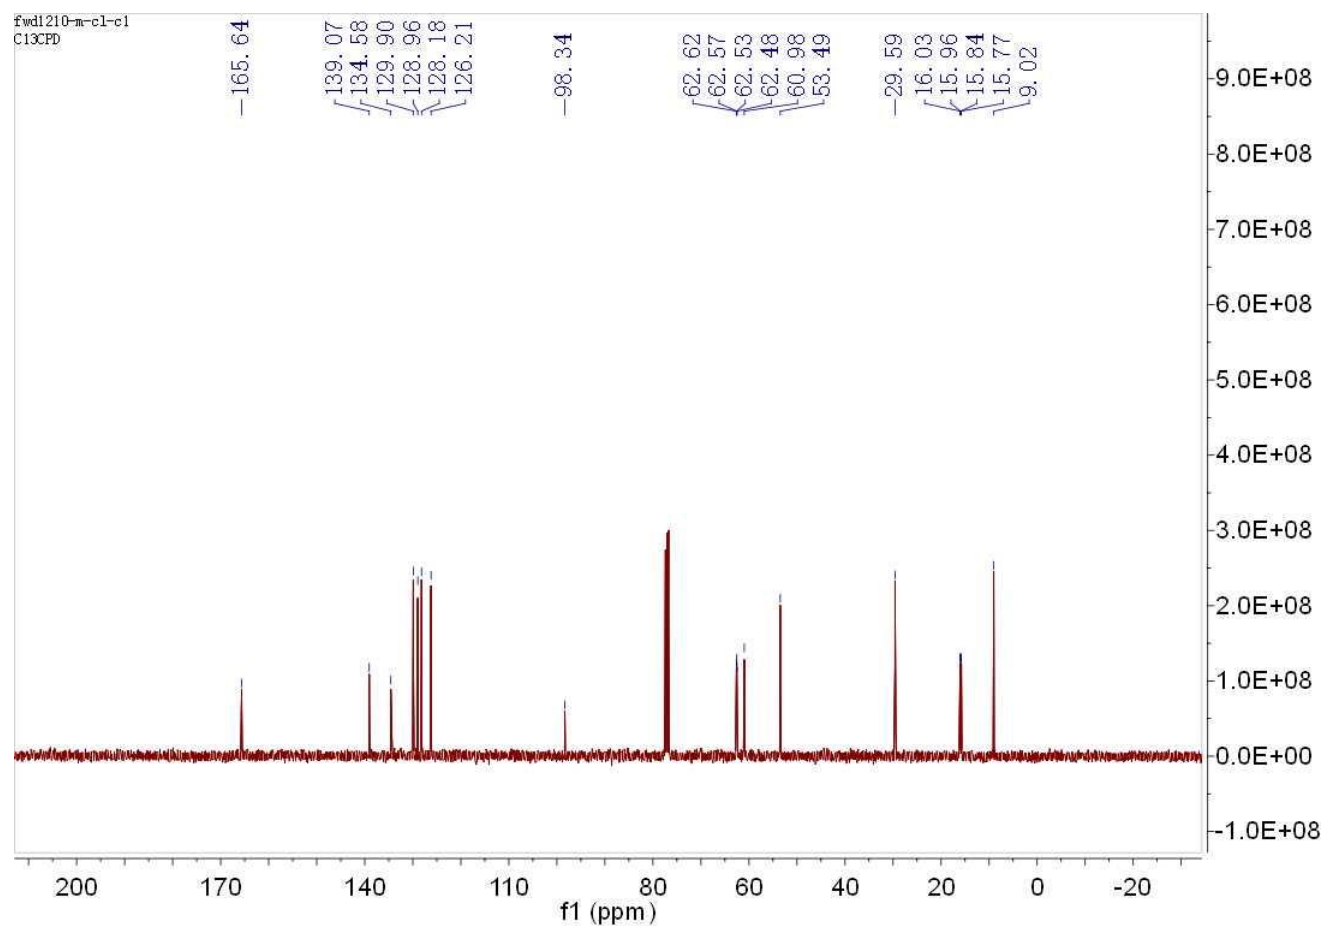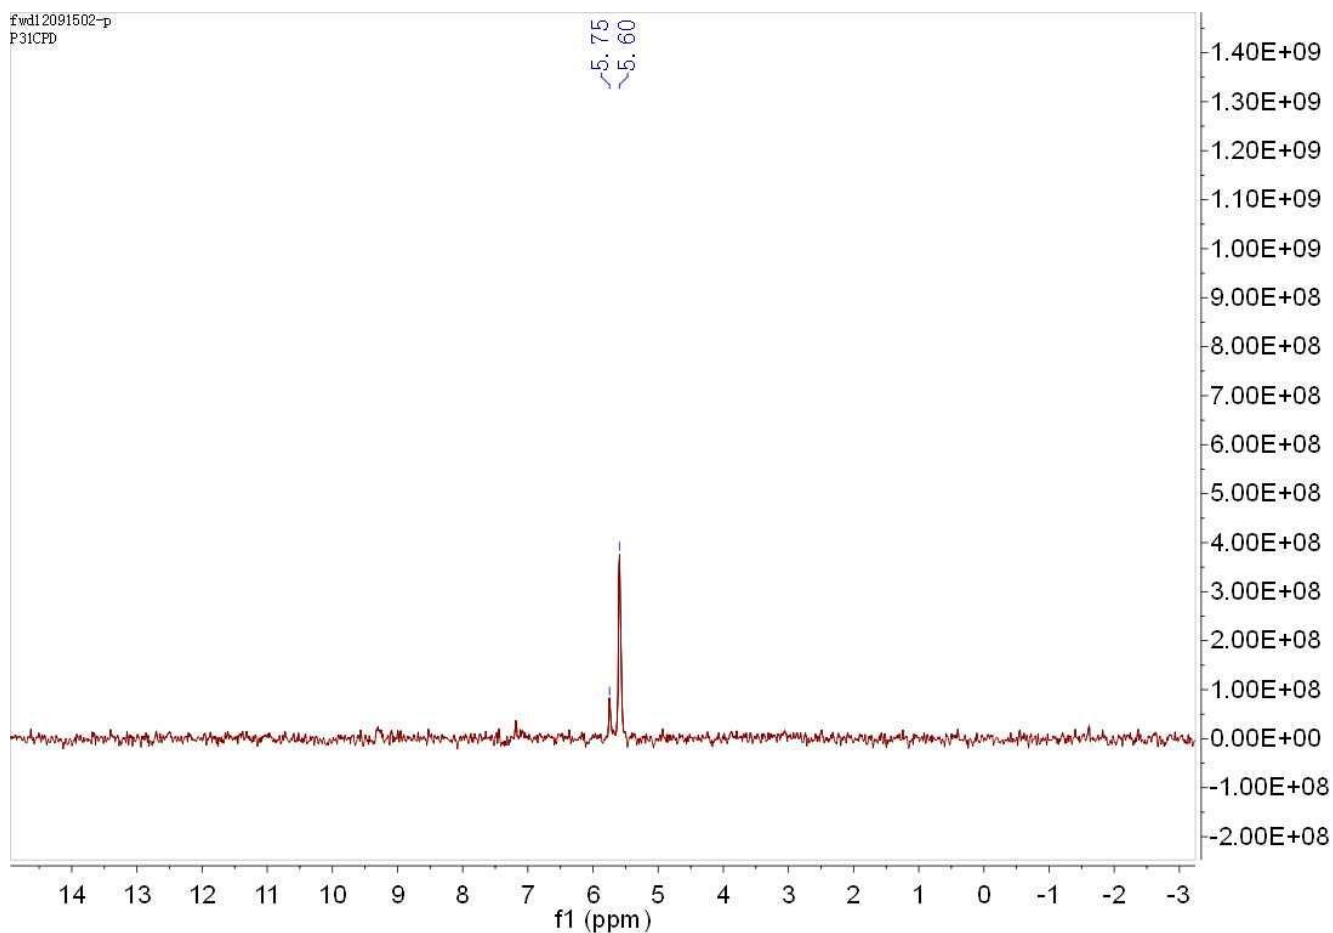

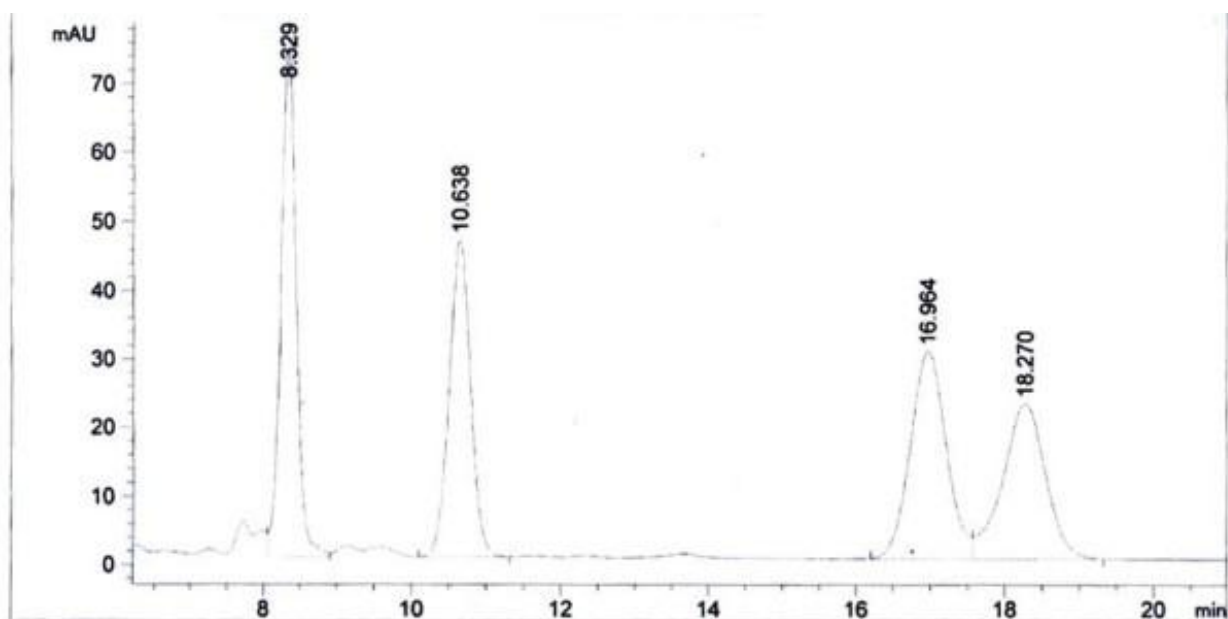

| # | [min]  |    | [min]  | mAU        | *s | [mAU ]   | %       |
|---|--------|----|--------|------------|----|----------|---------|
| 1 | 8.329  | VV | 0.2230 | 1074.57056 |    | 74.11059 | 27.3074 |
| 2 | 10.638 | VB | 0.3070 | 924.48511  |    | 46.34566 | 23.4934 |
| 3 | 16.964 | BV | 0.5183 | 1025.83069 |    | 30.44744 | 26.0688 |
| 4 | 18.270 | VB | 0.6036 | 910.20184  |    | 22.75321 | 23.1304 |

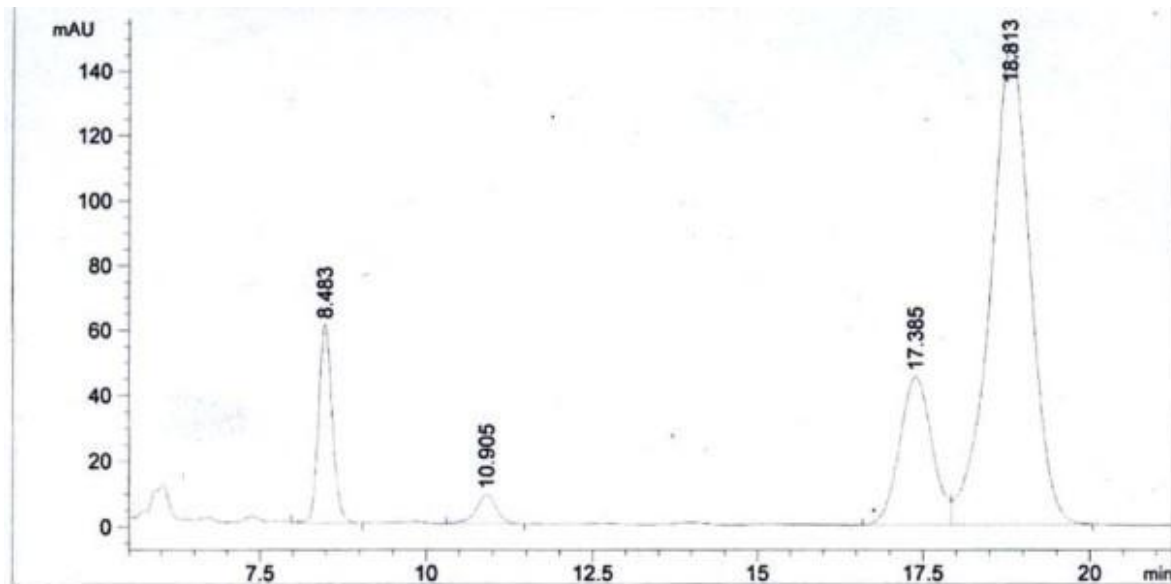

| # | [min]  |    | [min]  | mAU        | *s | [mAU ]    | %       |
|---|--------|----|--------|------------|----|-----------|---------|
| 1 | 8.483  | VB | 0.2230 | 879.33209  |    | 60.66296  | 10.1061 |
| 2 | 10.905 | BB | 0.3242 | 191.10847  |    | 8.91939   | 2.1964  |
| 3 | 17.385 | BV | 0.5209 | 1530.18567 |    | 45.28720  | 17.5863 |
| 4 | 18.813 | VB | 0.6174 | 6100.37109 |    | 148.56720 | 70.1112 |

**Reference:**

- [1] L. Jiang, H. T. Zheng, T. Y. Liu, L. Yue, Y. C. Chen, *Tetrahedron* **2007**, *63*, 5123.
- [2] B. Vakulya, S. Varga, A. Csámpai, T. Soós, *Org. Lett.* **2005**, *7*, 1967.
- [3] K. Liu, H. F. Cui, J. Nie, K. Y. Dong, X. J. Li, J. A. Ma, *Org. Lett.* **2007**, *9*, 923.
